# Supplementary material for: Synthesis of 3-azabicyclo[3.1.0]hexane derivatives via palladium-catalyzed cyclopropanation of maleimides with N-tosylhydrazones: practical and facile access to CP-866,087
Source: Royal Society of Chemistry journal article supplement (doi:10.1039/c6ob02137a), 2017-01-01

# Supporting Information

## Synthesis of 3-Azabicyclo[3.1.0]hexane Derivatives *via* Palladium-Catalyzed Cyclopropanation of Maleimides with *N*-Tosylhydrazones: Practical and Facile Access to CP- 866,087

Pengquan Chen,<sup>†</sup> Chuanle Zhu,<sup>†</sup> Rui Zhu, Zhiming Lin, Wanqing Wu,<sup>\*</sup> Huanfeng Jiang<sup>\*</sup>

Key Laboratory of Functional Molecular Engineering of Guangdong Province, School of  
Chemistry and Chemical Engineering, South China University of Technology, Guangzhou 510640,  
P. R. China

E-mail: cewuwq@scut.edu.cn, jianghf@scut.edu.cn; Fax and Tel.: (+86) 020-87112906

|                                                                                                                                   |            |
|-----------------------------------------------------------------------------------------------------------------------------------|------------|
| <b>A. General Information .....</b>                                                                                               | <b>S2</b>  |
| <b>B. General Condition Optimizing Process for the Reaction of Non-Terminal<br/>Olefin 2a and <i>N</i>-Tosylhydrazones 1.....</b> | <b>S3</b>  |
| <b>C. General Process for Substrate Scope of <i>N</i>-Tosylhydrazones and Maleimides</b>                                          | <b>S3</b>  |
| <b>D. Analysis Data for the Products .....</b>                                                                                    | <b>S4</b>  |
| <b>E. X-ray Crystallographic Data for 3g.....</b>                                                                                 | <b>S17</b> |
| <b>F. X-ray Crystallographic Data for 4a .....</b>                                                                                | <b>S18</b> |
| <b>G. NMR Spectra of New Compounds .....</b>                                                                                      | <b>S20</b> |

## A. General Information

Melting points were measured using a melting point instrument and are uncorrected. Chemical shifts were reported in ppm from the solvent resonance as the internal standard ( $\text{CDCl}_3$   $\delta_{\text{H}} = 7.26$  ppm,  $\delta_{\text{C}} = 77.16$  ppm). Multiplicity was indicated as follows: s (singlet), d (doublet), t (triplet), q (quartet), m (multiplet). Coupling constants were reported in Hertz (Hz). IR spectra were obtained with an infrared spectrometer on either potassium bromide pellets or liquid films between two potassium bromide pellets. GC-MS data were obtained using electron ionization. HRMS was carried out on a high-resolution mass spectrometer (LCMS-IT-TOF). TLC was performed using commercially available 100–400 mesh silica gel plates (GF<sub>254</sub>). X-ray structural analyses were conducted on an X-ray analysis instrument. The 25 mL Schlenk tube was purchased commercially and used directly to optimize the reaction conditions.

**Materials.** *N*-Tosylhydrazones were synthesized according to literature procedure. Other commercially available reagents and solvents were purchased and used without further purification. Analytical thin-layer chromatography was performed on 0.20 mm silica gel plates (GF<sub>254</sub>) using UV light as a visualizing agent. Flash column chromatography was carried out using silica gel (200–300 mesh) with the indicated solvent system. All reactions were conducted in oven-dried Schlenk tubes. All the reaction temperatures reported are oil bath temperatures.

**Caution:** Normally, *N*-tosylhydrazones are potentially explosive at high temperature. All these grams-scale experiments must be handled carefully. Although no accident happened during our investigation, we strongly recommend all operations involving *N*-tosylhydrazones should carry out in a well-ventilated hood behind a blast shield.

## B. General Condition Optimizing Process for the Reaction of Non-Terminal Olefin **2a** and *N*-Tosylhydrazones **1**

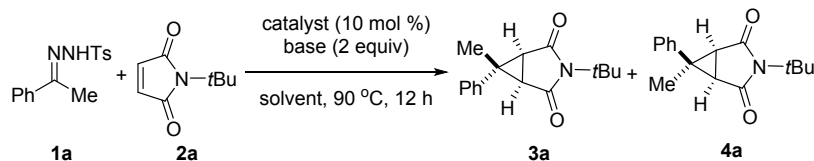

A 25 mL round-bottom flask equipped with a magnetic stirring bar, a reflux condenser, **1a** (0.4 mmol), **2** (0.2 mmol), catalyst (10 mol %), base (2 equiv), solvent (2 mL). The mixture was stirred at 90 °C in an oil bath under N<sub>2</sub>. After 12 h, the resulting solution was cooled to room temperature, added water (10 mL), and then extracted with EtOAc (3 × 10 mL). The combined organic phases were dried over anhydrous Na<sub>2</sub>SO<sub>4</sub>, filtered and concentrated *in vacuo*. The ratio of **3a** and **4a** were determined by GC-MS analysis of the obtained crude product. Further purification by flash column chromatography on silica gel (eluting with petroleum ether/ethyl acetate) provided the pure product **3a** and **4a**.

## C. General Process for Substrate Scope of *N*-Tosylhydrazones and Maleimides

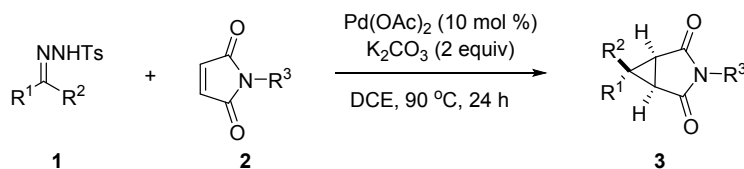

A 250 mL round-bottom flask equipped with a magnetic stirring bar, a reflux condenser, **1** (20 mmol), **2** (10 mmol), Pd(OAc)<sub>2</sub> (10 mol %), K<sub>2</sub>CO<sub>3</sub> (2 equiv), solvent (100 mL). The mixture was stirred at 90 °C in an oil bath under N<sub>2</sub>. After 24 h, the resulting solution was cooled to room temperature, added water (100 mL), and then extracted with EtOAc (3 × 100 mL). The combined organic phases were dried over anhydrous Na<sub>2</sub>SO<sub>4</sub>, filtered and concentrated *in vacuo*. Further purification by flash column chromatography on silica gel (eluting with petroleum ether/ethyl acetate) provided the pure product **3**.

## D. Analysis Data for the Products

### *trans*-3-(*tert*-Butyl)-6-Methyl-6-Phenyl-3-Azabicyclo[3.1.0]hexane-2,4-Dione (3a)

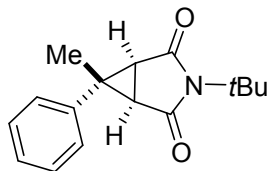

1.82 g, 71% yield; white solid, mp: 149–150 °C ; TLC (petroleum ether/ethyl acetate, 10:1 v/v):  $R_f = 0.60$ ;  $^1\text{H NMR}$  (400 MHz,  $\text{CDCl}_3$ )  $\delta$  7.53–7.25 (m, 5H), 2.65 (s, 2H), 1.58 (s, 9H), 1.57 (s, 3H);  $^{13}\text{C NMR}$  (100 MHz,  $\text{CDCl}_3$ )  $\delta$  174.6, 143.0, 128.9, 127.6, 127.3, 58.1, 41.2, 32.5, 28.5, 17.0; IR (KBr): 2973, 2931, 1765, 1702, 1531, 1454, 1339, 1263, 1166, 1083, 1010  $\text{cm}^{-1}$ ; HRMS (ESI,  $m/z$ ):  $[\text{M}+\text{H}]^+$  Calcd. for  $\text{C}_{16}\text{H}_{20}\text{NO}_2$ , 258.1489; found, 258.1488.

### *trans*-3-(*tert*-Butyl)-6-(2-Fluorophenyl)-6-Methyl-3-Azabicyclo[3.1.0]hexane-2,4-Dione (3b)

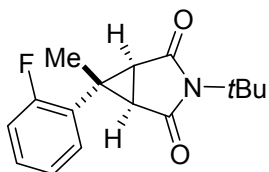

2.09 g, 76% yield; white solid, mp: 96–97 °C; TLC (petroleum ether/ethyl acetate, 15:1 v/v):  $R_f = 0.48$ ;  $^1\text{H NMR}$  (400 MHz,  $\text{CDCl}_3$ )  $\delta$  7.31–7.25 (m, 2H), 7.13–7.04 (m, 2H), 2.63 (s, 2H), 1.59 (s, 9H), 1.54 (s, 3H);  $^{13}\text{C NMR}$  (100 MHz,  $\text{CDCl}_3$ )  $\delta$  174.2, 160.8 (d,  $^1J_{\text{F-C}} = 248.0$  Hz), 130.0 (d,  $^2J_{\text{F-C}} = 13.6$  Hz), 129.7 (d,  $^3J_{\text{F-C}} = 8.1$  Hz), 129.6 (d,  $^4J_{\text{F-C}} = 3.5$  Hz), 124.5 (d,  $^3J_{\text{F-C}} = 3.7$  Hz), 116.2 (d,  $^2J_{\text{F-C}} = 21.1$  Hz), 58.1, 36.6, 31.7, 28.5, 16.1;  $^{19}\text{F NMR}$  (376 MHz,  $\text{CDCl}_3$ )  $\delta$  -114.6 – -114.7 (m, 1F); IR (KBr): 3074, 2976, 1768, 1704, 1490, 1455, 1341, 1262, 1216, 1166, 1080, 1012  $\text{cm}^{-1}$ ; HRMS (ESI,  $m/z$ ):  $[\text{M}+\text{H}]^+$  Calcd. For  $\text{C}_{16}\text{H}_{19}\text{FNO}_2$ , 276.1394; found, 276.1395.

### *trans*-3-(*tert*-Butyl)-6-(3-Fluorophenyl)-6-Methyl-3-Azabicyclo[3.1.0]hexane-2,4-Dione (3c)

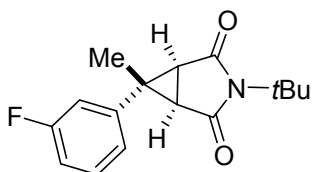

2.28 g, 83% yield; white solid, mp: 92–93 °C; TLC (petroleum ether/ethyl acetate, 15:1 v/v):  $R_f =$

0.50;  $^1\text{H}$  NMR (400 MHz,  $\text{CDCl}_3$ )  $\delta$  7.30 (q,  $J = 7.2$  Hz, 1H), 7.08 (d,  $J = 7.6$  Hz, 1H), 6.98 (m, 2H), 2.63 (s, 2H), 1.58 (s, 9H), 1.57 (s, 3H);  $^{13}\text{C}$  NMR (100 MHz,  $\text{CDCl}_3$ )  $\delta$  174.4, 162.9 (d,  $^1J_{\text{F-C}} = 245.9$  Hz), 145.2 (d,  $^3J_{\text{F-C}} = 7.4$  Hz), 130.5 (d,  $^3J_{\text{F-C}} = 8.3$  Hz), 122.8 (d,  $^4J_{\text{F-C}} = 2.8$  Hz), 114.7 (d,  $^2J_{\text{F-C}} = 16.6$  Hz), 114.5 (d,  $^2J_{\text{F-C}} = 17.9$  Hz), 58.2, 40.3, 32.6, 28.5, 16.6;  $^{19}\text{F}$  NMR (376 MHz,  $\text{CDCl}_3$ )  $\delta$  -111.8 – -111.9 (m, 1F); IR (KBr): 3061, 2971, 2927, 1691, 1584, 1444, 1355, 1261, 1172, 1090, 1021  $\text{cm}^{-1}$ ; HRMS (ESI,  $m/z$ ):  $[\text{M}+\text{H}]^+$  Calcd. for  $\text{C}_{16}\text{H}_{19}\text{FNO}_2$ , 276.1394; found, 276.1393.

***trans*-3-(*tert*-Butyl)-6-(4-Fluorophenyl)-6-Methyl-3-Azabicyclo[3.1.0]hexane-2,4-Dione (3d)**

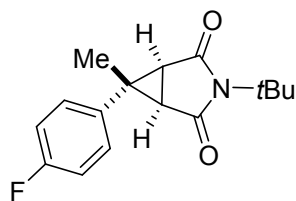

2.42 g, 88% yield; white solid, mp: 95–96 °C; TLC (petroleum ether/ethyl acetate, 15:1 v/v):  $R_f = 0.48$ ;  $^1\text{H}$  NMR (400 MHz,  $\text{CDCl}_3$ )  $\delta$  7.28 (dd,  $J_1 = 7.6$  Hz,  $J_2 = 5.2$  Hz, 2H), 7.02 (t,  $J = 8.4$  Hz, 2H), 2.61 (s, 2H), 1.58 (s, 9H), 1.55 (s, 3H);  $^{13}\text{C}$  NMR (100 MHz,  $\text{CDCl}_3$ )  $\delta$  174.4, 161.9 (d,  $^1J_{\text{F-C}} = 245.7$  Hz), 138.8 (d,  $^4J_{\text{F-C}} = 3.4$  Hz), 129.1 (d,  $^3J_{\text{F-C}} = 8.1$  Hz), 115.8 (d,  $^2J_{\text{F-C}} = 21.5$  Hz), 58.1, 40.5, 32.6, 28.5, 17.1;  $^{19}\text{F}$  NMR (376 MHz,  $\text{CDCl}_3$ )  $\delta$  -114.1 – -114.2 (m, 1F); IR (KBr): 2973, 2930, 2868, 1767, 1703, 1513, 1443, 1343, 1224, 1166, 1085, 1011  $\text{cm}^{-1}$ ; HRMS (ESI,  $m/z$ ):  $[\text{M}+\text{H}]^+$  Calcd. for  $\text{C}_{16}\text{H}_{19}\text{FNO}_2$ , 276.1394; found, 276.1399.

***trans*-3-(*tert*-Butyl)-6-(3-Chlorophenyl)-6-Methyl-3-Azabicyclo[3.1.0]hexane-2,4-Dione (3e)**

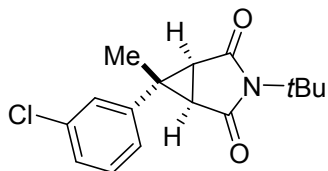

2.36 g, 81% yield; white solid, mp: 102–103 °C; TLC (petroleum ether/ethyl acetate, 15:1 v/v):  $R_f = 0.37$ ;  $^1\text{H}$  NMR (400 MHz,  $\text{CDCl}_3$ )  $\delta$  7.31 (s, 1H), 7.27–7.18 (m, 3H), 2.63 (s, 2H), 1.58 (s, 9H), 1.56 (s, 3H);  $^{13}\text{C}$  NMR (100 MHz,  $\text{CDCl}_3$ )  $\delta$  174.1, 144.7, 134.7, 130.2, 127.9, 125.5, 58.2, 40.4, 32.3, 28.5, 16.8; IR (KBr): 3263, 2974, 2923, 1764, 1691, 1464, 1357, 1260, 1174, 1095, 1022,  $\text{cm}^{-1}$ ; HRMS (ESI,  $m/z$ ):  $[\text{M}+\text{H}]^+$  Calcd. for  $\text{C}_{16}\text{H}_{19}\text{ClNO}_2$ , 292.1099; found, 292.1098.

***trans*-3-(*tert*-Butyl)-6-(4-Chlorophenyl)-6-Methyl-3-Azabicyclo[3.1.0]hexane-2,4-Dione (3f)**

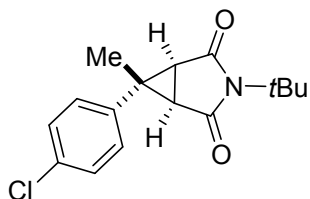

2.56 g, 88% yield; white solid, mp: 102–103 °C; TLC (petroleum ether/ethyl acetate, 15:1 v/v):  $R_f$  = 0.33;  $^1\text{H NMR}$  (400 MHz,  $\text{CDCl}_3$ )  $\delta$  7.31 (d,  $J$  = 8.4 Hz, 2H), 7.25 (d,  $J$  = 8.4 Hz, 2H), 2.61 (s, 2H), 1.58 (s, 9H), 1.55 (s, 3H);  $^{13}\text{C NMR}$  (100 MHz,  $\text{CDCl}_3$ )  $\delta$  174.2, 141.4, 133.5, 129.1, 128.7, 58.1, 40.3, 32.5, 28.5, 16.9; IR (KBr): 2970, 2933, 2872, 1767, 1702, 1483, 1340, 1165, 1093, 1011  $\text{cm}^{-1}$ ; HRMS (ESI,  $m/z$ ):  $[\text{M}+\text{Na}]^+$  Calcd. for  $\text{C}_{16}\text{H}_{18}\text{ClNNaO}_2$ , 314.0918; found, 314.0920.

***trans*-6-(3-Bromophenyl)-3-(*tert*-Butyl)-6-Methyl-3-Azabicyclo[3.1.0]hexane-2,4-Dione (3g)**

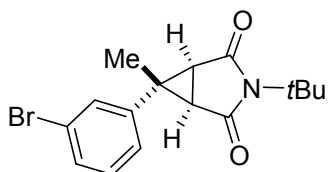

2.68 g, 80% yield; white solid, mp: 108–109 °C; TLC (petroleum ether/ethyl acetate, 15:1 v/v):  $R_f$  = 0.44;  $^1\text{H NMR}$  (400 MHz,  $\text{CDCl}_3$ )  $\delta$  7.47 (s, 1H), 7.40 (d,  $J$  = 7.2 Hz, 1H), 7.27–7.19 (m, 2H), 2.63 (s, 2H), 1.58 (s, 9H), 1.56 (s, 3H);  $^{13}\text{C NMR}$  (100 MHz,  $\text{CDCl}_3$ )  $\delta$  174.1, 145.0, 130.8, 130.7, 130.5, 126.0, 122.8, 58.2, 40.4, 32.3, 28.5, 16.9; IR (KBr): 3064, 2972, 2930, 1765, 1698, 1564, 1465, 1260, 1168, 1077, 1007  $\text{cm}^{-1}$ ; HRMS (ESI,  $m/z$ ):  $[\text{M}+\text{H}]^+$  Calcd. for  $\text{C}_{16}\text{H}_{19}\text{BrNO}_2$ , 336.0594; found, 336.0594.

***trans*-6-(4-Bromophenyl)-3-(*tert*-Butyl)-6-Methyl-3-Azabicyclo[3.1.0]hexane-2,4-Dione (3h)**

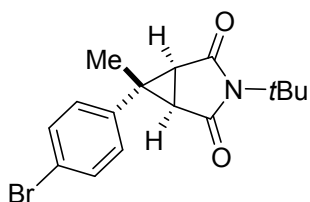

2.78 g, 83% yield; white solid, mp: 94–95 °C; TLC (petroleum ether/ethyl acetate, 15:1 v/v):  $R_f$  = 0.35;  $^1\text{H NMR}$  (400 MHz,  $\text{CDCl}_3$ )  $\delta$  7.46 (d,  $J$  = 8.4 Hz, 2H), 7.19 (d,  $J$  = 8.4 Hz, 2H), 2.61 (s, 2H), 1.58 (s, 9H), 1.55 (s, 3H);  $^{13}\text{C NMR}$  (100 MHz,  $\text{CDCl}_3$ )  $\delta$  174.2, 141.9, 132.1, 129.1, 121.6,

58.2, 40.4, 32.4, 28.5, 16.8; IR (KBr): 3074, 2973, 2930, 1765, 1702, 1485, 1341, 1263, 1166, 1085, 1010  $\text{cm}^{-1}$ ; HRMS (ESI,  $m/z$ ):  $[M+Na]^+$  Calcd. for  $\text{C}_{16}\text{H}_{18}\text{BrNNaO}_2$ , 358.0413; found, 358.0410.

***trans*-3-(*tert*-Butyl)-6-(4-Iodophenyl)-6-Methyl-3-Azabicyclo[3.1.0]hexane-2,4-Dione (3i)**

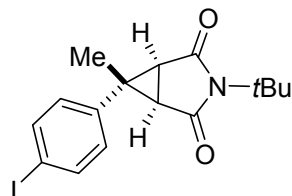

2.07 g, 67% yield; white solid, mp: 123–124 °C; TLC (petroleum ether/ethyl acetate, 15:1 v/v):  $R_f$  = 0.47;  $^1\text{H}$  NMR (400 MHz,  $\text{CDCl}_3$ )  $\delta$  7.67 (d,  $J$  = 8.0 Hz, 2H), 7.06 (d,  $J$  = 7.6 Hz, 2H), 2.60 (s, 2H), 1.57 (s, 9H), 1.54 (s, 3H);  $^{13}\text{C}$  NMR (100 MHz,  $\text{CDCl}_3$ )  $\delta$  174.2, 142.6, 138.0, 129.3, 93.1, 58.2, 40.5, 32.4, 28.5, 16.8; IR (KBr): 2972, 2928, 2864, 1766, 1701, 1482, 1339, 1264, 1166, 1087, 1007  $\text{cm}^{-1}$ ; HRMS (ESI,  $m/z$ ):  $[M+Na]^+$  Calcd. for  $\text{C}_{16}\text{H}_{18}\text{INNaO}_2$ , 406.0274; found, 406.0272.

**Methyl 4-(*trans*-3-(*tert*-butyl)-6-Methyl-2,4-Dioxo-3-Azabicyclo[3.1.0]hexan-6-yl)benzoate (3j)**

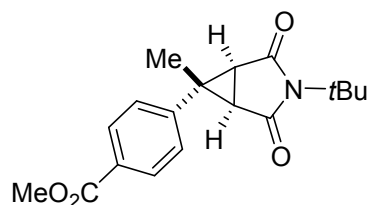

2.43 g, 77% yield; white solid, mp: 137–138 °C; TLC (petroleum ether/ethyl acetate, 15:1 v/v):  $R_f$  = 0.22;  $^1\text{H}$  NMR (400 MHz,  $\text{CDCl}_3$ )  $\delta$  8.01 (d,  $J$  = 8.4 Hz, 2H), 7.38 (d,  $J$  = 8.0 Hz, 2H), 3.91 (s, 3H), 2.66 (s, 2H), 1.59 (s, 12H);  $^{13}\text{C}$  NMR (100 MHz,  $\text{CDCl}_3$ )  $\delta$  174.1, 166.4, 147.6, 130.2, 129.5, 127.3, 58.2, 52.2, 40.5, 32.5, 28.5, 16.5; IR (KBr): 3069, 2941, 1701, 1610, 1450, 1343, 1278, 1170, 1106, 1012  $\text{cm}^{-1}$ ; HRMS (ESI,  $m/z$ ):  $[M+H]^+$  Calcd. for  $\text{C}_{18}\text{H}_{22}\text{NO}_4$ , 316.1543; found, 316.1538.

***trans*-3-(*tert*-Butyl)-6-Methyl-6-(4-(trifluoromethyl)phenyl)-3-Azabicyclo[3.1.0]hexane-2,4-Dione (3k)**

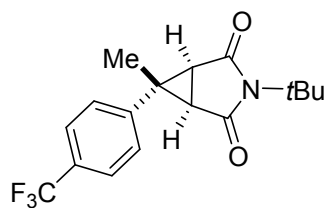

2.60 g, 80% yield; white solid, mp: 177–178 °C; TLC (petroleum ether/ethyl acetate, 15:1 v/v):  $R_f$  = 0.30;  $^1\text{H}$  NMR (400 MHz,  $\text{CDCl}_3$ )  $\delta$  7.61 (d,  $J$  = 8.0 Hz, 2H), 7.44 (d,  $J$  = 8.0 Hz, 2H), 2.65 (s, 2H), 1.59 (s, 12H);  $^{13}\text{C}$  NMR (100 MHz,  $\text{CDCl}_3$ )  $\delta$  174.1, 146.7, 130.0 (q,  $^2J_{\text{F-C}}$  = 32.5 Hz), 127.8, 126.0 (d,  $^3J_{\text{F-C}}$  = 3.6 Hz), 123.8, (q,  $^1J_{\text{F-C}}$  = 270.1 Hz), 58.3, 30.4, 32.3, 28.5, 16.7;  $^{19}\text{F}$  NMR (376 MHz,  $\text{CDCl}_3$ )  $\delta$  -62.7 (s, 3F); IR (KBr): 3062, 2980, 2927, 2856, 1689, 1463, 1342, 1263, 1163, 1083, 1027  $\text{cm}^{-1}$ ; HRMS (ESI,  $m/z$ ):  $[\text{M}+\text{Na}]^+$  Calcd. for  $\text{C}_{17}\text{H}_{18}\text{F}_3\text{NNaO}_2$ , 348.1182; found, 348.1180.

***trans*-3-(*tert*-Butyl)-6-Methyl-6-(4-Nitrophenyl)-3-Azabicyclo[3.1.0]hexane-2,4-Dione (3l)**

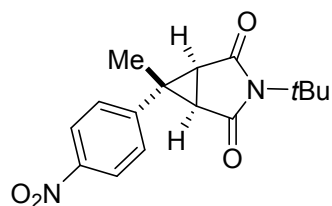

2.20 g, 73% yield; white solid, mp: 167–168 °C; TLC (petroleum ether/ethyl acetate, 10:1 v/v):  $R_f$  = 0.32;  $^1\text{H}$  NMR (400 MHz,  $\text{CDCl}_3$ )  $\delta$  8.21 (d,  $J$  = 8.8 Hz, 2H), 7.50 (d,  $J$  = 8.4 Hz, 2H), 2.68 (s, 2H), 1.61 (s, 3H), 1.59 (s, 9H);  $^{13}\text{C}$  NMR (100 MHz,  $\text{CDCl}_3$ )  $\delta$  173.6, 149.6, 147.2, 128.3, 124.2, 58.4, 39.9, 32.4, 28.5, 16.5; IR (KBr): 3116, 3059, 2978, 2931, 2867, 1764, 1693, 1515, 1354, 1265, 1177, 1087, 1030  $\text{cm}^{-1}$ ; HRMS (ESI,  $m/z$ ):  $[\text{M}+\text{Na}]^+$  Calcd. for  $\text{C}_{16}\text{H}_{18}\text{N}_2\text{NaO}_4$ , 325.1159; found, 325.1162.

***trans*-3-(*tert*-Butyl)-6-Methyl-6-(*m*-Tolyl)-3-Azabicyclo[3.1.0]hexane-2,4-Dione (3m)**

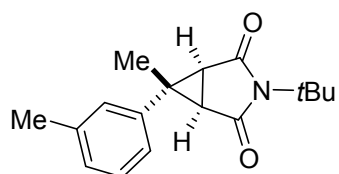

2.09 g, 77% yield; white solid, mp: 96–97 °C; TLC (petroleum ether/ethyl acetate, 15:1 v/v):  $R_f$  =



0.56;  $^1\text{H}$  NMR (400 MHz,  $\text{CDCl}_3$ )  $\delta$  7.20 (t,  $J = 7.2$  Hz, 1H), 7.10 (m, 3H), 2.63 (s, 2H), 2.34 (s, 3H), 1.58 (s, 9H), 1.56 (s, 3H);  $^{13}\text{C}$  NMR (100 MHz,  $\text{CDCl}_3$ )  $\delta$  174.7, 143.0, 138.7, 129.8, 128.3, 128.2, 124.4, 58.0, 41.4, 32.5, 28.5, 21.3, 17.1; IR (KBr): 3067, 2971, 2926, 2868, 1763, 1698, 1460, 1335, 1266, 1165, 1082, 1007  $\text{cm}^{-1}$ ; HRMS (ESI,  $m/z$ ):  $[\text{M}+\text{Na}]^+$  Calcd. for  $\text{C}_{17}\text{H}_{21}\text{NNaO}_2$ , 294.1464; found, 294.1469.

***trans*-3-(*tert*-Butyl)-6-Methyl-6-(*p*-Yolyl)-3-Azabicyclo[3.1.0]hexane-2,4-Dione (3n)**

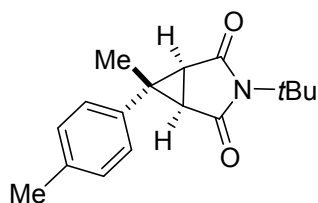

2.01 g, 74% yield; white solid, mp: 93–94 °C; TLC (petroleum ether/ethyl acetate, 15:1 v/v):  $R_f = 0.55$ ;  $^1\text{H}$  NMR (400 MHz,  $\text{CDCl}_3$ )  $\delta$  7.20–7.14 (m, 4H), 2.62 (s, 2H), 2.32 (s, 3H), 1.58 (s, 9H), 1.56 (s, 3H);  $^{13}\text{C}$  NMR (100 MHz,  $\text{CDCl}_3$ )  $\delta$  174.7, 140.1, 137.4, 129.5, 127.2, 58.0, 41.0, 32.7, 28.5, 21.0, 17.0; IR (KBr): 2972, 2926, 2865, 1765, 1703, 1462, 1338, 1264, 1164, 1085, 1009  $\text{cm}^{-1}$ ; HRMS (ESI,  $m/z$ ):  $[\text{M}+\text{Na}]^+$  Calcd. for  $\text{C}_{17}\text{H}_{21}\text{NNaO}_2$ , 294.1464 found, 294.1468.

***trans*-3-(*tert*-Butyl)-6-(3-Methoxyphenyl)-6-Methyl-3-Azabicyclo[3.1.0]hexane-2,4-Dione (3o)**

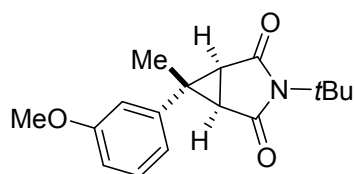

1.89 g, 66% yield; white solid, mp: 92–93 °C; TLC (petroleum ether/ethyl acetate, 15:1 v/v):  $R_f = 0.43$ ;  $^1\text{H}$  NMR (400 MHz,  $\text{CDCl}_3$ )  $\delta$  7.24 (t,  $J = 8.0$  Hz, 1H), 6.90–6.79 (m, 3H), 3.80 (s, 3H), 2.64 (s, 2H), 1.58 (s, 9H), 1.57 (s, 3H);  $^{13}\text{C}$  NMR (100 MHz,  $\text{CDCl}_3$ )  $\delta$  174.6, 159.9, 144.5, 130.0, 119.5, 113.2, 113.1, 58.0, 55.3, 41.2, 32.6, 28.5, 16.9; IR (KBr): 2972, 2928, 2836, 1765, 1702, 1464, 1339, 1270, 1164, 1045, 1008  $\text{cm}^{-1}$ ; HRMS (ESI,  $m/z$ ):  $[\text{M}+\text{Na}]^+$  Calcd. for  $\text{C}_{17}\text{H}_{21}\text{NNaO}_3$ , 310.1414; found, 310.1415.

***trans*-3-(*tert*-Butyl)-6-(4-Methoxyphenyl)-6-Methyl-3-Azabicyclo[3.1.0]hexane-2,4-Dione (3p)**

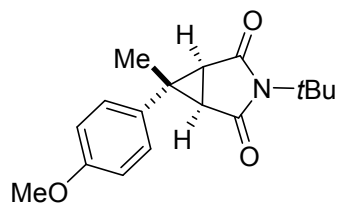

1.61 g, 56% yield; white solid, mp: 94–95 °C; TLC (petroleum ether/ethyl acetate, 15:1 v/v):  $R_f$  = 0.41;  $^1\text{H NMR}$  (400 MHz,  $\text{CDCl}_3$ )  $\delta$  7.22 (d,  $J$  = 8.8 Hz, 2H), 6.85 (d,  $J$  = 8.8 Hz, 2H), 3.79 (s, 3H), 2.61 (s, 2H), 1.58 (s, 9H), 1.55 (s, 3H);  $^{13}\text{C NMR}$  (100 MHz,  $\text{CDCl}_3$ )  $\delta$  174.7, 158.9, 135.1, 128.3, 114.2, 58.0, 55.3, 40.8, 32.8, 28.5, 17.1; IR (KBr): 2970, 2926, 2838, 1763, 1699, 1462, 1340, 1252, 1167, 1084, 1027  $\text{cm}^{-1}$ ; HRMS (ESI,  $m/z$ ):  $[\text{M}+\text{Na}]^+$  Calcd. for  $\text{C}_{17}\text{H}_{21}\text{NNaO}_3$ , 310.1414; found, 310.1415.

***trans*-3-(*tert*-Butyl)-6-Methyl-6-(4-(Methylthio)phenyl)-3-Azabicyclo[3.1.0]hexane-2,4-Dione**

**(3q)**

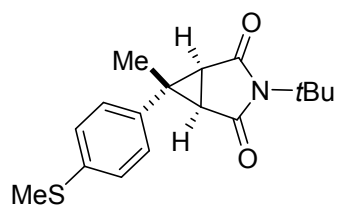

1.76 g, 58% yield; white solid, mp: 116–117 °C; TLC (petroleum ether/ethyl acetate, 15:1 v/v):  $R_f$  = 0.30;  $^1\text{H NMR}$  (400 MHz,  $\text{CDCl}_3$ )  $\delta$  7.21 (s, 4H), 2.61 (s, 2H), 2.47 (s, 3H), 1.58 (s, 9H), 1.55 (s, 3H);  $^{13}\text{C NMR}$  (100 MHz,  $\text{CDCl}_3$ )  $\delta$  174.5, 139.7, 138.2, 127.8, 126.8, 58.1, 40.7, 32.6, 28.5, 16.9, 15.7; IR (KBr): 3061, 2972, 2926, 1762, 1691, 1456, 1351, 1263, 1164, 1086, 1015  $\text{cm}^{-1}$ ; HRMS (ESI,  $m/z$ ):  $[\text{M}+\text{Na}]^+$  Calcd. for  $\text{C}_{17}\text{H}_{21}\text{NNaO}_2\text{S}$ , 326.1185; found, 326.1183.

**4-(*trans*-3-(*tert*-Butyl)-6-Methyl-2,4-Dioxo-3-Azabicyclo[3.1.0]hexan-6-yl)phenyl acetate (3r)**

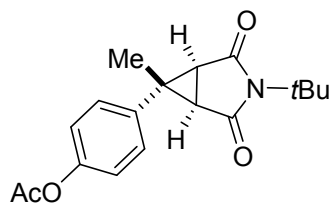

2.24 g, 71% yield; white solid, mp: 151–152 °C; TLC (petroleum ether/ethyl acetate, 10:1 v/v):  $R_f$  = 0.30;  $^1\text{H NMR}$  (400 MHz,  $\text{CDCl}_3$ )  $\delta$  7.32 (d,  $J$  = 8.4 Hz, 2H), 7.05 (d,  $J$  = 8.0 Hz, 2H), 2.63 (s, 2H), 2.29 (s, 3H), 1.58 (s, 9H), 1.56 (s, 3H);  $^{13}\text{C NMR}$  (100 MHz,  $\text{CDCl}_3$ )  $\delta$  174.4, 169.3, 149.9, 140.5, 128.6, 122.1, 58.1, 40.6, 32.5, 28.5, 21.1, 17.1; IR (KBr): 3075, 2975, 2934, 1762, 1699,

1459, 1364, 1264, 1198, 1083, 1011  $\text{cm}^{-1}$ ; HRMS (ESI,  $m/z$ ):  $[\text{M}+\text{H}]^+$  Calcd. for  $\text{C}_{18}\text{H}_{22}\text{NO}_4$ , 316.1543; found, 316.1545.

***trans*-3-(*tert*-Butyl)-6-(3,4-Dichlorophenyl)-6-Methyl-3-Azabicyclo[3.1.0]hexane-2,4-Dione**

(3s)

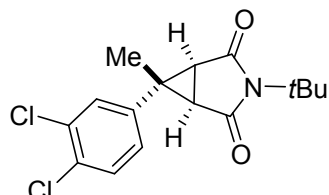

2.41 g, 74% yield; white solid, mp: 158–159 °C; TLC (petroleum ether/ethyl acetate, 15:1 v/v):  $R_f$  = 0.40;  $^1\text{H}$  NMR (400 MHz,  $\text{CDCl}_3$ )  $\delta$  7.42–7.39 (m, 2H), 7.15 (d,  $J$  = 8.4 Hz, 1H), 2.61 (s, 2H), 1.58 (s, 9H), 1.55 (s, 3H);  $^{13}\text{C}$  NMR (100 MHz,  $\text{CDCl}_3$ )  $\delta$  173.9, 142.9, 133.0, 130.9, 129.5, 126.7, 58.3, 39.6, 32.3, 28.4, 16.7; IR (KBr): 3070, 2975, 2935, 1767, 1702, 1470, 1340, 1265, 1168, 1087, 1020  $\text{cm}^{-1}$ ; HRMS (ESI,  $m/z$ ):  $[\text{M}+\text{H}]^+$  Calcd. for  $\text{C}_{16}\text{H}_{18}\text{Cl}_2\text{NO}_2$ , 326.0709; found, 326.0704.

***trans*-3-(*tert*-Butyl)-6-Methyl-6-(Naphthalen-2-yl)-3-Azabicyclo[3.1.0]hexane-2,4-Dione(3t)**

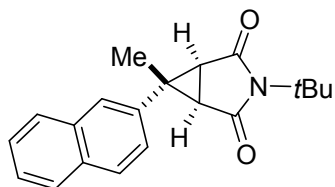

2.21 g, 72% yield; white solid, mp: 161–162 °C; TLC (petroleum ether/ethyl acetate, 15:1 v/v):  $R_f$  = 0.56;  $^1\text{H}$  NMR (400 MHz,  $\text{CDCl}_3$ )  $\delta$  7.8 (t,  $J$  = 8.0 Hz, 3H), 7.76 (s, 1H), 7.51–7.46 (m, 2H), 7.42 (d,  $J$  = 8.4 Hz, 1H), 2.75 (s, 2H), 1.66 (s, 3H), 1.61 (s, 9H);  $^{13}\text{C}$  NMR (100 MHz,  $\text{CDCl}_3$ )  $\delta$  174.6, 140.2, 133.2, 132.6, 128.9, 127.8, 127.6, 126.6, 126.4, 126.1, 125.4, 58.1, 41.4, 32.6, 28.5, 17.0; IR (KBr): 2976, 2921, 2853, 1761, 1698, 1467, 1337, 1268, 1161  $\text{cm}^{-1}$ ; HRMS (ESI,  $m/z$ ):  $[\text{M}+\text{Na}]^+$  Calcd. for  $\text{C}_{20}\text{H}_{21}\text{NNaO}_2$ , 330.1464; found, 330.1467.

***trans*-6-(Benzofuran-2-yl)-3-(*tert*-Butyl)-6-Methyl-3-Azabicyclo[3.1.0]hexane-2,4-Dione (3u)**

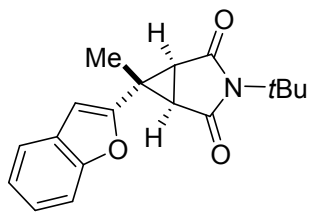

1.90 g, 64% yield; white solid, mp: 133–134 °C; TLC (petroleum ether/ethyl acetate, 15:1 v/v):  $R_f = 0.48$ ;  $^1\text{H NMR}$  (400 MHz,  $\text{CDCl}_3$ )  $\delta$  7.50 (d,  $J = 7.2$  Hz 1H), 7.37 ((d,  $J = 8.0$  Hz 1H), 7.27–7.19 (m, 2H), 6.59 (s, 1H), 2.96 (s, 2H), 1.69 (s, 3H), 1.59 (s, 9H);  $^{13}\text{C NMR}$  (100 MHz,  $\text{CDCl}_3$ )  $\delta$  173.5, 156.4, 154.3, 128.1, 124.5, 123.1, 120.9, 111.0, 103.3, 58.3, 33.6, 32.6, 28.5, 11.8; IR (KBr): 3108, 2976, 2928, 1764, 1702, 1459, 1349, 1265, 1163, 1083, 1014  $\text{cm}^{-1}$ ; HRMS (ESI, m/z):  $[\text{M}+\text{Na}]^+$  Calcd. for  $\text{C}_{18}\text{H}_{19}\text{NNaO}_3$ , 320.1257; found, 320.1260.

***trans*-3-(*tert*-Butyl)-6-Methyl-6-(thiophen-2-yl)-3-Azabicyclo[3.1.0]hexane-2,4-Dione (3v)**

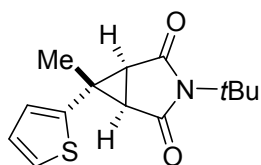

1.32 g, 50% yield; white solid, mp: 74–75 °C; TLC (petroleum ether/ethyl acetate, 15:1 v/v):  $R_f = 0.57$ ;  $^1\text{H NMR}$  (400 MHz,  $\text{CDCl}_3$ )  $\delta$  7.17 (d,  $J = 4.8$  Hz, 1H), 6.91 (t,  $J = 4.0$  Hz, 1H), 6.86 (d,  $J = 3.6$  Hz, 1H), 2.71 (s, 2H), 1.68 (s, 3H), 1.57 (s, 9H);  $^{13}\text{C NMR}$  (100 MHz,  $\text{CDCl}_3$ )  $\delta$  173.5, 146.9, 126.9, 124.3, 123.8, 58.2, 35.9, 35.2, 28.5, 15.9; IR (KBr): 2973, 2929, 1766, 1702, 1463, 1338, 1264, 1165, 1075, 1007  $\text{cm}^{-1}$ ; HRMS (ESI, m/z):  $[\text{M}+\text{Na}]^+$  Calcd. for  $\text{C}_{14}\text{H}_{17}\text{NNaO}_2\text{S}$ , 286.0872; found, 286.0872.

***trans*-3-(*tert*-Butyl)-6-Methyl-6-(Pyridin-3-yl)-3-Azabicyclo[3.1.0]hexane-2,4-Dione (3w)**

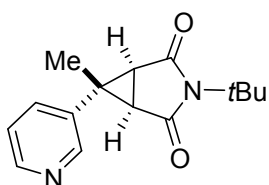

1.47 g, 57% yield; orange solid, mp: 150–151 °C; TLC (petroleum ether/ethyl acetate, 1:1 v/v):  $R_f = 0.45$ ;  $^1\text{H NMR}$  (400 MHz,  $\text{CDCl}_3$ )  $\delta$  8.57 (d,  $J = 27.6$  Hz, 2H), 7.62 (s, 1H), 7.27 (s, 1H), 2.66 (s, 2H), 1.59 (s, 9H), 1.58 (s, 3H);  $^{13}\text{C NMR}$  (100 MHz,  $\text{CDCl}_3$ )  $\delta$  173.9, 156.9, 148.9, 138.4, 135.0,

123.6, 58.3, 38.4, 31.9, 28.5, 16.7; IR (KBr): 3042, 2981, 2937, 1762, 1700, 1467, 1364, 1262, 1171, 1083, 1022  $\text{cm}^{-1}$ ; HRMS (ESI,  $m/z$ ):  $[\text{M}+\text{H}]^+$  Calcd. for  $\text{C}_{15}\text{H}_{19}\text{N}_2\text{O}_2$ , 259.1441; found, 259.1443.

***trans*-3-(*tert*-Butyl)-2',3'-Dihydro-3-Azaspiro[bicyclo[3.1.0]hexane-6,1'-indene]-2,4-Dione (3x)**

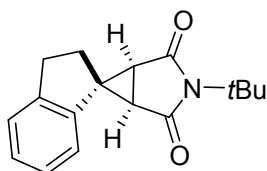

0.81 g, 30% yield; white solid, mp: 119–120 °C; TLC (petroleum ether/ethyl acetate, 15:1 v/v):  $R_f$  = 0.50;  $^1\text{H}$  NMR (400 MHz,  $\text{CDCl}_3$ )  $\delta$  7.22–7.14 (m, 3H), 6.67 (d,  $J$  = 7.2 Hz, 1H), 3.12 (t,  $J$  = 7.6 Hz, 2H), 2.64 (s, 2H), 2.28 (t,  $J$  = 7.6 Hz, 2H), 1.57 (s, 9H);  $^{13}\text{C}$  NMR (100 MHz,  $\text{CDCl}_3$ )  $\delta$  174.3, 143.7, 141.9, 128.1, 127.1, 124.9, 119.1, 57.9, 46.5, 34.2, 29.9, 28.5, 26.2; IR (KBr): 2970, 2928, 2855, 1764, 1701, 1464, 1344, 1265, 1163, 1008  $\text{cm}^{-1}$ ; HRMS (ESI,  $m/z$ ):  $[\text{M}+\text{Na}]^+$  Calcd. for  $\text{C}_{17}\text{H}_{19}\text{NNaO}_2$ , 292.1308; found, 292.1309.

***trans*-3-(*tert*-Butyl)-3',4'-Dihydro-2'*H*-3-Azaspiro[bicyclo[3.1.0]hexane-6,1'-naphthalene]-2,4-Dione (3y)**

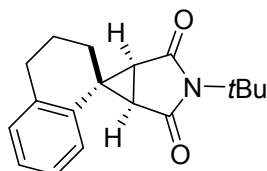

1.13 g, 40% yield; white solid, mp: 72–73 °C; TLC (petroleum ether/ethyl acetate, 15:1 v/v):  $R_f$  = 0.58;  $^1\text{H}$  NMR (400 MHz,  $\text{CDCl}_3$ )  $\delta$  7.16–7.09 (m, 3H), 6.65 (d,  $J$  = 6.8 Hz, 1H), 2.88 (t,  $J$  = 5.2 Hz, 2H), 2.69 (s, 2H), 1.96–1.91 (m, 4H), 1.58 (s, 9H);  $^{13}\text{C}$  NMR (100 MHz,  $\text{CDCl}_3$ )  $\delta$  173.9, 137.9, 136.6, 129.3, 126.9, 126.6, 121.8, 58.1, 38.2, 36.4, 30.2, 28.5, 24.2, 21.9; IR (KBr): 2932, 2865, 1763, 1700, 1458, 1343, 1263, 1166, 1009  $\text{cm}^{-1}$ ; HRMS (ESI,  $m/z$ ):  $[\text{M}+\text{Na}]^+$  Calcd. for  $\text{C}_{18}\text{H}_{21}\text{NNaO}_2$ , 306.1464; found, 306.1466.

***trans*-3'-(*tert*-Butyl)-6,7,8,9-Tetrahydro-3'-Azaspiro[benzo[7]annulene-5,6'-bicyclo[3.1.0]hexane]-2',4'-Dione (3z)**

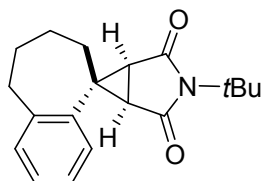

0.92 g, 31% yield; white solid, mp: 134–135 °C; TLC (petroleum ether/ethyl acetate, 15:1 v/v):  $R_f = 0.61$ ;  $^1\text{H NMR}$  (400 MHz,  $\text{CDCl}_3$ )  $\delta$  7.19–7.15 (m, 4H), 2.98 (d,  $J = 10.4$  Hz, 2H), 2.65 (s, 2H), 1.87–1.80 (m, 4H), 1.68 (s, 2H), 1.58 (s, 9H);  $^{13}\text{C NMR}$  (100 MHz,  $\text{CDCl}_3$ )  $\delta$  175.0, 143.4, 141.7, 129.7, 127.9, 126.4, 126.2, 57.9, 45.0, 34.9, 32.8, 28.5, 28.4, 28.3, 27.3; IR (KBr): 2930, 2857, 1765, 1701, 1454, 1341, 1266, 1209, 1165, 1015  $\text{cm}^{-1}$ ; HRMS (ESI,  $m/z$ ):  $[\text{M}+\text{Na}]^+$  Calcd. for  $\text{C}_{19}\text{H}_{23}\text{NNaO}_2$ , 320.1621; found, 320.1620.

***trans*-3-(*tert*-Butyl)-6-Ethyl-6-Phenyl-3-Azabicyclo[3.1.0]hexane-2,4-Dione (3aa)**

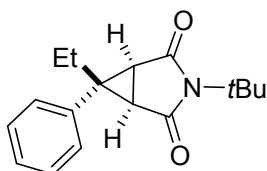

1.71 g, 63% yield; white solid, mp: 75–76 °C; TLC (petroleum ether/ethyl acetate, 15:1 v/v):  $R_f = 0.40$ ;  $^1\text{H NMR}$  (400 MHz,  $\text{CDCl}_3$ )  $\delta$  7.32 (s, 5H), 2.64 (s, 2H), 1.86 (d,  $J = 7.2$  Hz, 2H), 1.58 (s, 9H), 0.91 (t,  $J = 7.2$  Hz, 3H);  $^{13}\text{C NMR}$  (100 MHz,  $\text{CDCl}_3$ )  $\delta$  174.6, 141.3, 128.8, 128.7, 127.7, 57.9, 47.6, 32.2, 28.5, 24.0, 10.6; IR (KBr): 3069, 2973, 2877, 1766, 1689, 1458, 1340, 1265, 1166, 1077, 1016  $\text{cm}^{-1}$ ; HRMS (ESI,  $m/z$ ):  $[\text{M}+\text{Na}]^+$  Calcd. for  $\text{C}_{17}\text{H}_{21}\text{NNaO}_2$ , 294.1464; found, 294.1467.

***trans*-3-(*tert*-Butyl)-6-Phenyl-6-Propyl-3-Azabicyclo[3.1.0]hexane-2,4-Dione (3ab)**

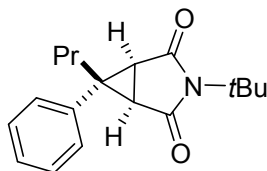

1.91 g, 67% yield; white solid, mp: 73–74 °C; TLC (petroleum ether/ethyl acetate, 15:1 v/v):  $R_f = 0.47$ ;  $^1\text{H NMR}$  (400 MHz,  $\text{CDCl}_3$ )  $\delta$  7.31 (s, 5H), 2.63 (s, 2H), 1.80 (t,  $J = 8.4$  Hz, 2H), 1.59 (s, 9H), 1.39–1.28 (m, 2H), 0.82 (t,  $J = 7.2$  Hz, 3H);  $^{13}\text{C NMR}$  (100 MHz,  $\text{CDCl}_3$ )  $\delta$  174.6, 141.6, 128.7, 128.6, 127.6, 57.9, 46.6, 33.0, 32.2, 28.5, 19.7, 13.9; IR (KBr): 2964, 2872, 1766, 1703,

1457, 1339, 1264, 1166, 1014  $\text{cm}^{-1}$ ; HRMS (ESI,  $m/z$ ):  $[\text{M}+\text{Na}]^+$  Calcd. for  $\text{C}_{18}\text{H}_{23}\text{NNaO}_2$ , 308.1621; found, 308.1624.

***trans*-3-(*tert*-Butyl)-6-Isopropyl-6-Phenyl-3-Azabicyclo[3.1.0]hexane-2,4-Dione (3ac)**

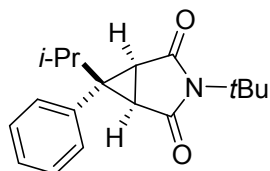

1.37 g, 48% yield; white solid, mp: 142–143  $^{\circ}\text{C}$ ; TLC (petroleum ether/ethyl acetate, 15:1 v/v):  $R_f$  = 0.40;  $^1\text{H}$  NMR (400 MHz,  $\text{CDCl}_3$ )  $\delta$  7.30 (s, 5H), 2.64 (s, 2H), 1.95–1.88 (m, 1H), 1.58 (s, 9H), 0.93 (d,  $J$  = 6.8 Hz, 6H);  $^{13}\text{C}$  NMR (100 MHz,  $\text{CDCl}_3$ )  $\delta$  174.5, 138.2, 130.8, 128.1, 127.8, 58.0, 52.0, 33.2, 28.5, 27.4, 20.0; IR (KBr): 3072, 2967, 2927, 1759, 1698, 1454, 1370, 1259, 1172, 1079, 1017  $\text{cm}^{-1}$ ; HRMS (ESI,  $m/z$ ):  $[\text{M}+\text{Na}]^+$  Calcd. for  $\text{C}_{18}\text{H}_{23}\text{NNaO}_2$ , 308.1621; found, 308.1624.

***trans*-3-(*tert*-Butyl)-6-Cyclopropyl-6-Phenyl-3-Azabicyclo[3.1.0]hexane-2,4-Dione (3ad)**

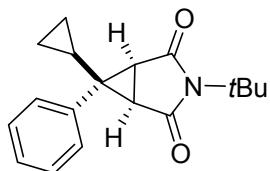

0.99 g, 35% yield; white solid, mp: 90–91  $^{\circ}\text{C}$ ; TLC (petroleum ether/ethyl acetate, 15:1 v/v):  $R_f$  = 0.43;  $^1\text{H}$  NMR (400 MHz,  $\text{CDCl}_3$ )  $\delta$  7.31–7.21 (m, 5H), 2.68 (s, 2H), 1.59 (s, 9H), 1.15–1.12 (m, 1H), 0.50 (d,  $J$  = 8.0 Hz, 2H), 0.22 (d,  $J$  = 5.2 Hz, 2H);  $^{13}\text{C}$  NMR (100 MHz,  $\text{CDCl}_3$ )  $\delta$  174.7, 140.2, 129.2, 128.5, 127.7, 57.9, 46.3, 32.3, 28.4, 11.3, 4.9; IR (KBr): 2974, 2929, 1766, 1702, 1458, 1344, 1266, 1210, 1166, 1017  $\text{cm}^{-1}$ ; HRMS (ESI,  $m/z$ ):  $[\text{M}+\text{Na}]^+$  Calcd. for  $\text{C}_{18}\text{H}_{21}\text{NNaO}_2$ , 306.1464; found, 306.1469.

***trans*-3-Cyclohexyl-6-Methyl-6-Phenyl-3-Azabicyclo[3.1.0]hexane-2,4-Dione (3ae)**

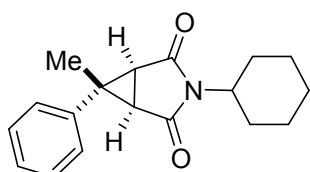

1.90 g, 67% yield; white solid, mp: 94–95 °C; TLC (petroleum ether/ethyl acetate, 15:1 v/v):  $R_f = 0.56$ ;  $^1\text{H NMR}$  (400 MHz,  $\text{CDCl}_3$ )  $\delta$  7.32 (s, 5H), 3.93 (t,  $J = 12.0$  Hz, 1H), 2.20–2.11 (m, 2H), 1.83 (d,  $J = 12.4$  Hz, 2H), 1.67–1.60 (m, 3H), 1.53 (s, 3H), 1.36–1.21 (m, 3H);  $^{13}\text{C NMR}$  (100 MHz,  $\text{CDCl}_3$ )  $\delta$  173.6, 142.9, 128.9, 127.7, 127.3, 51.5, 42.0, 32.4, 29.0, 25.9, 25.0, 17.2; IR (KBr): 3076, 2930, 2857, 1765, 1698, 1449, 1371, 1266, 1188, 1052  $\text{cm}^{-1}$ ; HRMS (ESI,  $m/z$ ):  $[\text{M}+\text{Na}]^+$  Calcd. for  $\text{C}_{18}\text{H}_{21}\text{NNaO}_2$ , 306.1464; found, 306.1467.

***trans*-3-Benzyl-6-Methyl-6-Phenyl-3-Azabicyclo[3.1.0]hexane-2,4-Dione (3af)**

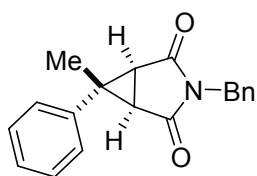

1.78 g, 61% yield; white solid, mp: 151–152 °C; TLC (petroleum ether/ethyl acetate, 10:1 v/v):  $R_f = 0.43$ ;  $^1\text{H NMR}$  (400 MHz,  $\text{CDCl}_3$ )  $\delta$  7.43 (d,  $J = 7.2$  Hz, 2H), 7.34–7.25 (m, 8H), 4.61 (s, 2H), 2.76 (s, 2H), 1.27 (s, 3H);  $^{13}\text{C NMR}$  (100 MHz,  $\text{CDCl}_3$ )  $\delta$  173.2, 142.8, 135.7, 129.3, 129.0, 128.6, 128.1, 127.7, 127.2, 42.8, 42.1, 32.5, 17.0; IR (KBr): 3077, 2967, 2858, 1760, 1695, 1440, 1392, 1336, 1167, 1058, 1000  $\text{cm}^{-1}$ ; HRMS (ESI,  $m/z$ ):  $[\text{M}+\text{Na}]^+$  Calcd. for  $\text{C}_{19}\text{H}_{17}\text{NNaO}_2$ , 314.1151; found, 314.1152.

***trans*-3-Benzyl-6-(3-Bromophenyl)-6-Ethyl-3-Azabicyclo[3.1.0]hexane-2,4-Dione (3ag)**

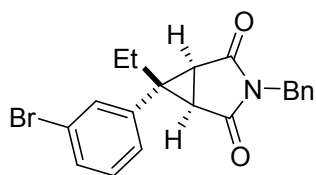

2.80 g, 73% yield; white solid, mp: 126–127 °C; TLC (petroleum ether/ethyl acetate, 15:1 v/v):  $R_f = 0.25$ ;  $^1\text{H NMR}$  (400 MHz,  $\text{CDCl}_3$ )  $\delta$  7.45–7.40 (m, 4H), 7.33–7.17 (m, 5H), 4.61 (s, 2H), 2.73 (s, 2H), 1.43 (q,  $J = 7.6$  Hz 2H), 0.70 (t,  $J = 7.6$  Hz 3H);  $^{13}\text{C NMR}$  (100 MHz,  $\text{CDCl}_3$ )  $\delta$  172.8, 143.2, 135.7, 131.8, 131.1, 130.3, 129.3, 128.6, 128.1, 127.4, 122.7, 48.3, 42.2, 31.9, 23.9, 10.3; IR (KBr): 3066, 2926, 2858, 1768, 1703, 1567, 1394, 1342, 1164, 1064, 1002  $\text{cm}^{-1}$ ; HRMS (ESI,  $m/z$ ):  $[\text{M}+\text{Na}]^+$  Calcd. for  $\text{C}_{20}\text{H}_{18}\text{NNaO}_2$ , 406.0413; found, 406.0404.



***cis*-3-(*tert*-Butyl)-6-Methyl-6-Phenyl-3-Azabicyclo[3.1.0]hexane-2,4-Dione (4a)**

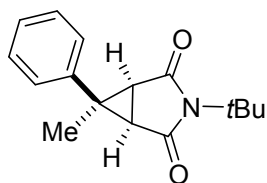

0.44 g, 16% yield; white solid, mp: 120–121 °C; TLC (petroleum ether/ethyl acetate, 10:1 v/v):  $R_f$  = 0.30;  $^1\text{H NMR}$  (400 MHz,  $\text{CDCl}_3$ )  $\delta$  7.36–7.27 (m, 5H), 2.55 (s, 2H), 1.44 (s, 3H), 0.98 (s, 9H);  $^{13}\text{C NMR}$  (100 MHz,  $\text{CDCl}_3$ )  $\delta$  174.4, 138.1, 129.0, 128.9, 127.9, 56.9, 42.7, 33.2, 27.6, 27.5; IR (KBr): 3059, 3019, 2968, 1766, 1701, 1451, 1358, 1266, 1170, 1071, 1005  $\text{cm}^{-1}$ ; HRMS (ESI,  $m/z$ ):  $[\text{M}+\text{Na}]^+$  Calcd. for  $\text{C}_{16}\text{H}_{19}\text{NNaO}_2$ , 280.1308; found, 280.1308.

**E. X-ray Crystallographic Data for 3g**

The X-ray crystallographic structures for **3g**. ORTEP representation with 50% probability thermal ellipsoids. Solvent and hydrogen are omitted for clarity. Crystal data have been deposited to CCDC, number 1489545.

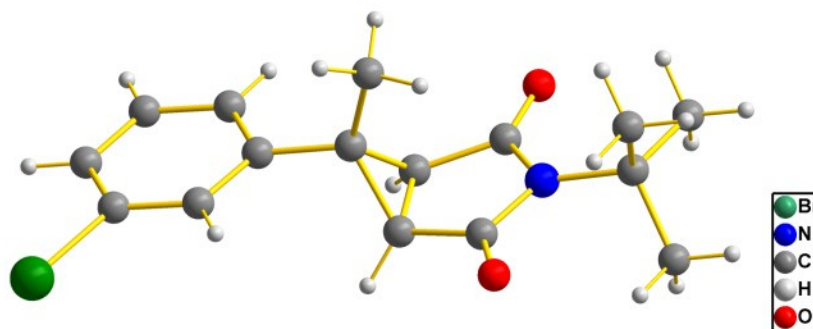

|                             |                                                                                                                             |
|-----------------------------|-----------------------------------------------------------------------------------------------------------------------------|
| Empirical formula           | $\text{C}_{16}\text{H}_{18}\text{BrNO}_2$                                                                                   |
| Formula weight              | 336.22                                                                                                                      |
| Temperature                 | 293(2) K                                                                                                                    |
| Wavelength                  | 0.71073 Å                                                                                                                   |
| Crystal system, space group | MONOCLINIC, P2(1)/c                                                                                                         |
| Unit cell dimensions        | $a = 6.9645(14)$ Å $\alpha = 90$ deg.<br>$b = 14.893(3)$ Å $\beta = 101.19(3)$ deg.<br>$c = 14.570(3)$ Å $\gamma = 90$ deg. |

|                                   |                                             |
|-----------------------------------|---------------------------------------------|
| Volume                            | 1482.5(5) Å <sup>3</sup>                    |
| Z, Calculated density             | 4, 1.506 Mg/m <sup>3</sup>                  |
| Absorption coefficient            | 2.774 mm <sup>-1</sup>                      |
| F(000)                            | 688                                         |
| Crystal size                      | 0.10×0.10×0.10 mm                           |
| Theta range for data collection   | 5.50 to 73.85 deg.                          |
| Limiting indices                  | -8 ≤ h ≤ 8, -17 ≤ k ≤ 17, -17 ≤ l ≤ 15      |
| Reflections collected / unique    | 10300 / 3491 [R(int) = 0.0420]              |
| Completeness to theta = 25.00     | 99.8%                                       |
| Refinement method                 | Full-matrix least-squares on F <sup>2</sup> |
| Data / restraints / parameters    | 2607 / 0 / 182                              |
| Goodness-of-fit on F <sup>2</sup> | 1.153                                       |
| Final R indices [I>2sigma(I)]     | R1 = 0.0396, wR2 = 0.0774                   |
| R indices (all data)              | R1 = 0.0845, wR2 = 0.1299                   |
| Extinction coefficient            | 0.0032(9)                                   |

## F. X-ray Crystallographic Data for 4a

The X-ray crystallographic structures for **4a**. ORTEP representation with 50% probability thermal ellipsoids. Solvent and hydrogen are omitted for clarity. Crystal data have been deposited to CCDC, number 1489546.

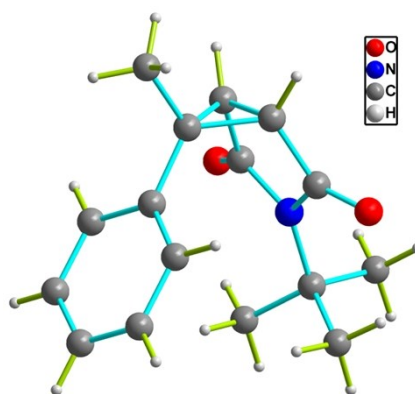

|                   |                                                 |
|-------------------|-------------------------------------------------|
| Empirical formula | C <sub>16</sub> H <sub>19</sub> NO <sub>2</sub> |
|-------------------|-------------------------------------------------|

|                                   |                                                                                                                |
|-----------------------------------|----------------------------------------------------------------------------------------------------------------|
| Formula weight                    | 257.32                                                                                                         |
| Temperature                       | 293(2) K                                                                                                       |
| Wavelength                        | 0.71073 Å                                                                                                      |
| Crystal system, space group       | MONOCLINIC, P2(1)/c                                                                                            |
| Unit cell dimensions              | a = 8.8657(18) Å    alpha = 90 deg.<br>b = 11.708(2) Å    beta = 90 deg.<br>c = 13.548(3) Å    gamma = 90 deg. |
| Volume                            | 1406.3(5) Å <sup>3</sup>                                                                                       |
| Z, Calculated density             | 4, 1.215 Mg/m <sup>3</sup>                                                                                     |
| Absorption coefficient            | 0.080 mm <sup>-1</sup>                                                                                         |
| F(000)                            | 552                                                                                                            |
| Crystal size                      | 0.10×0.10×0.10 mm                                                                                              |
| Theta range for data collection   | 3.01 to 27.48 deg.                                                                                             |
| Limiting indices                  | -10 ≤ h ≤ 11, -15 ≤ k ≤ 15, -17 ≤ l ≤ 17                                                                       |
| Reflections collected / unique    | 13757 / 3199 [R(int) = 0.0962]                                                                                 |
| Completeness to theta = 25.00     | 99.7%                                                                                                          |
| Refinement method                 | Full-matrix least-squares on F <sup>2</sup>                                                                    |
| Data / restraints / parameters    | 3199 / 0 / 173                                                                                                 |
| Goodness-of-fit on F <sup>2</sup> | 1.040                                                                                                          |
| Final R indices [I > 2sigma(I)]   | R1 = 0.0585, wR2 = 0.1521                                                                                      |
| R indices (all data)              | R1 = 0.0972, wR2 = 0.2084                                                                                      |
| Extinction coefficient            | 0.31(3)                                                                                                        |

## G. NMR Spectra of New Compounds

$^1\text{H}$  NMR (400 MHz,  $\text{CDCl}_3$ ) spectrum for **3a**

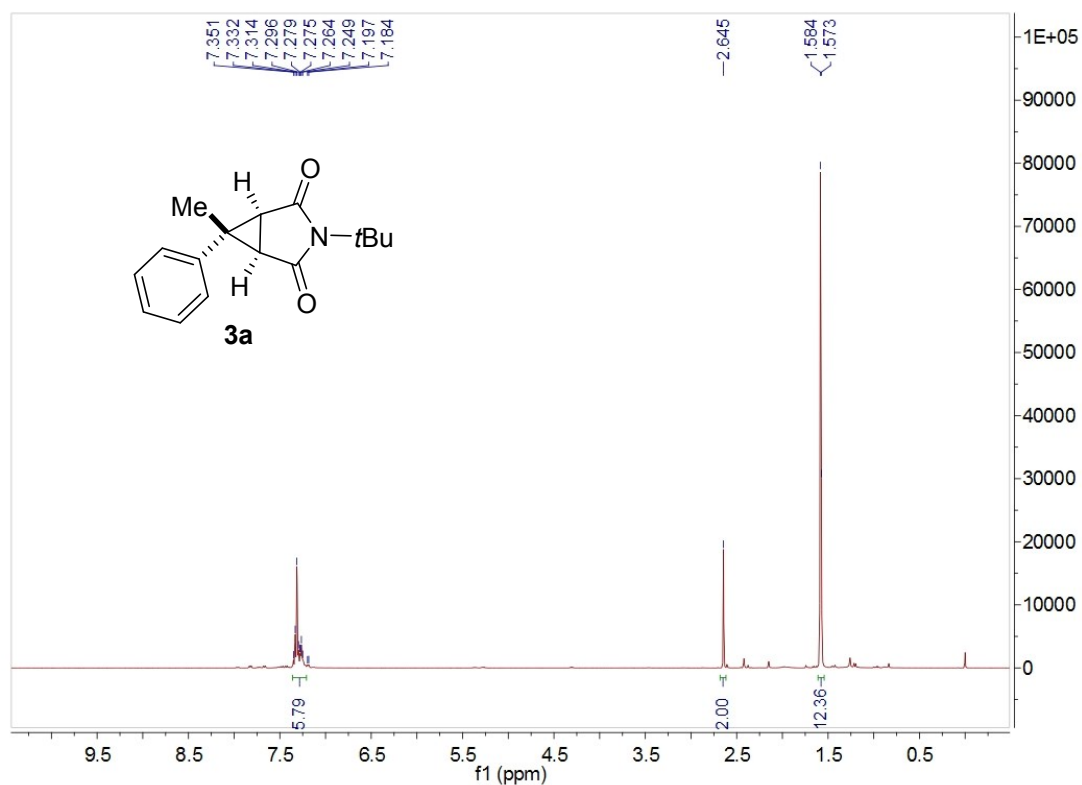

$^{13}\text{C}$  NMR (100 MHz,  $\text{CDCl}_3$ ) spectrum for **3a**

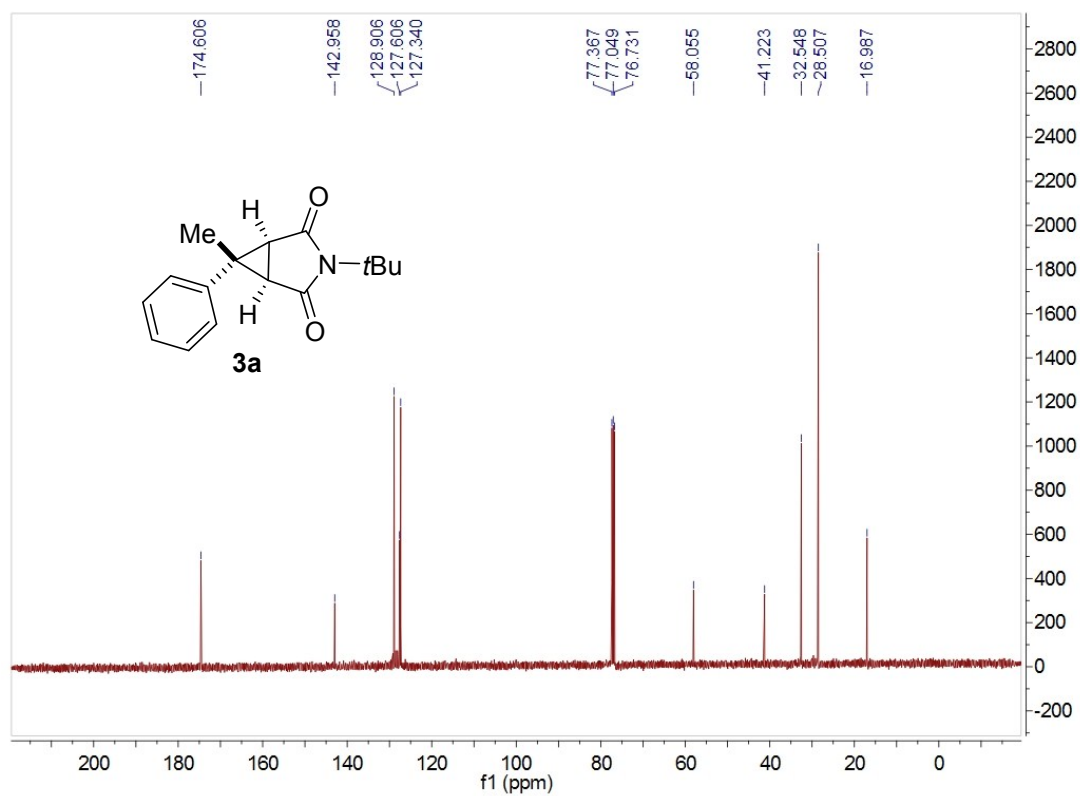

**<sup>1</sup>H NMR (400 MHz, CDCl<sub>3</sub>) spectrum for 3b**

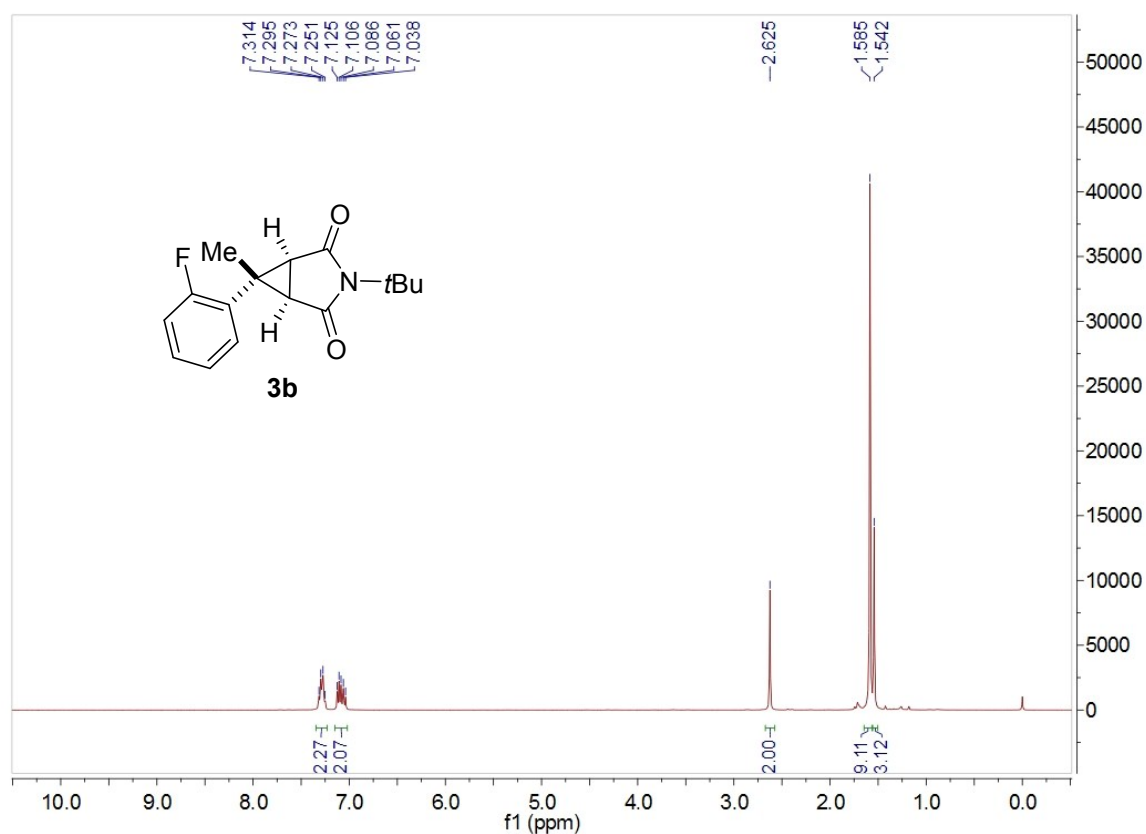

**<sup>13</sup>C NMR (100 MHz, CDCl<sub>3</sub>) spectrum for 3b**

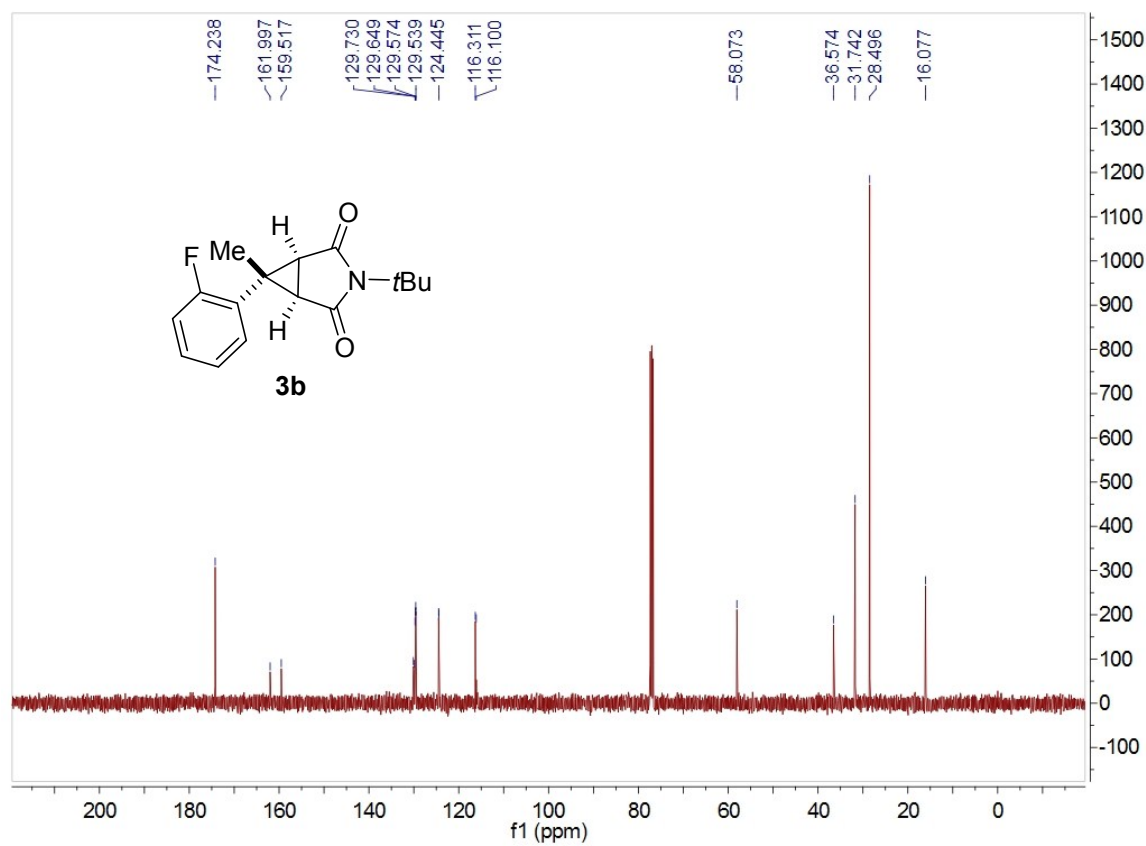

**<sup>19</sup>F NMR (376 MHz, CDCl<sub>3</sub>) spectrum for 3b**

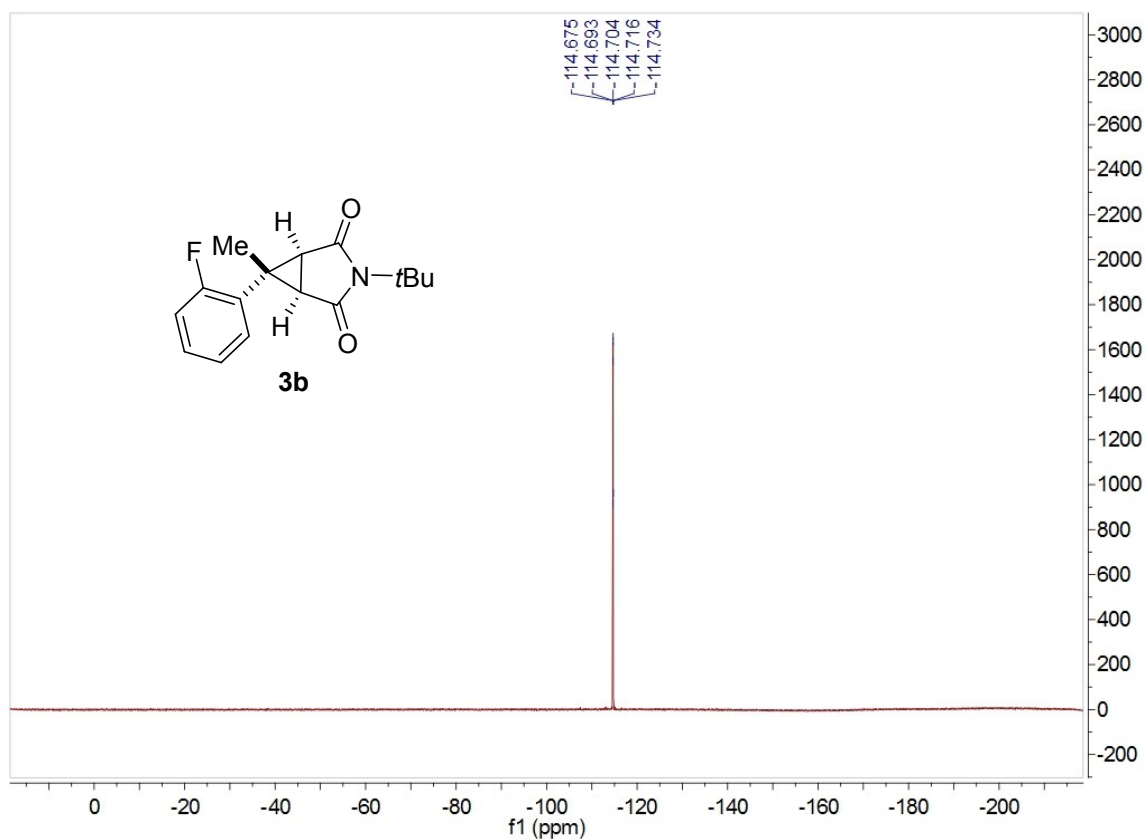

**<sup>1</sup>H NMR (400 MHz, CDCl<sub>3</sub>) spectrum for 3c**

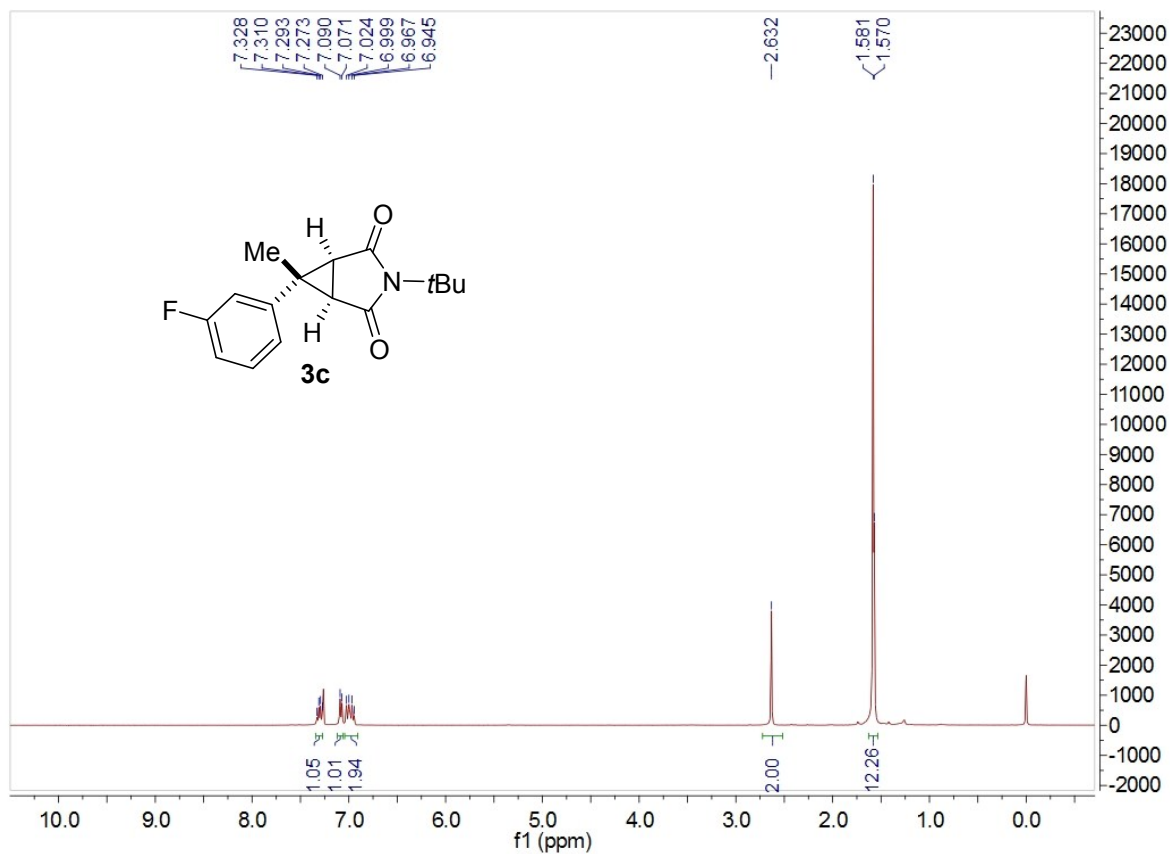

**<sup>13</sup>C NMR (100 MHz, CDCl<sub>3</sub>) spectrum for 3c**

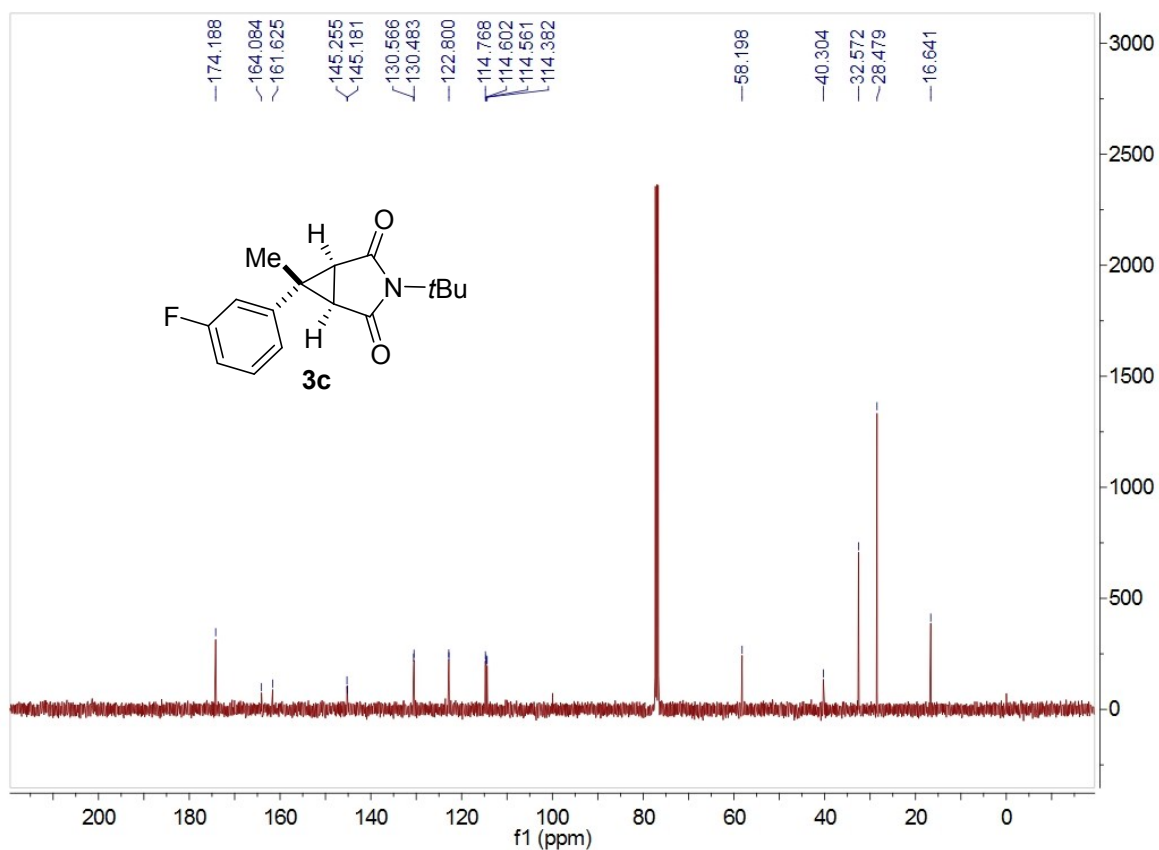

**<sup>19</sup>F NMR (376 MHz, CDCl<sub>3</sub>) spectrum for 3c**

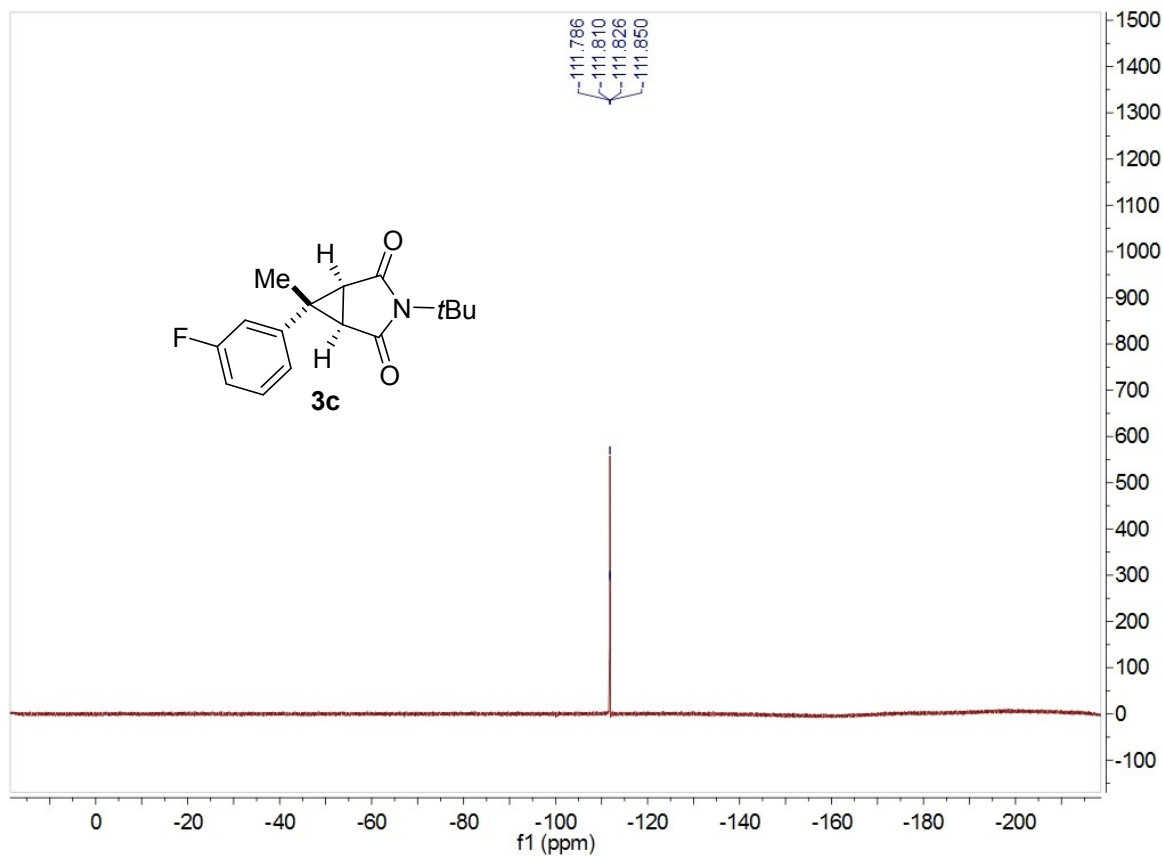

**<sup>1</sup>H NMR (400 MHz, CDCl<sub>3</sub>) spectrum for 3d**

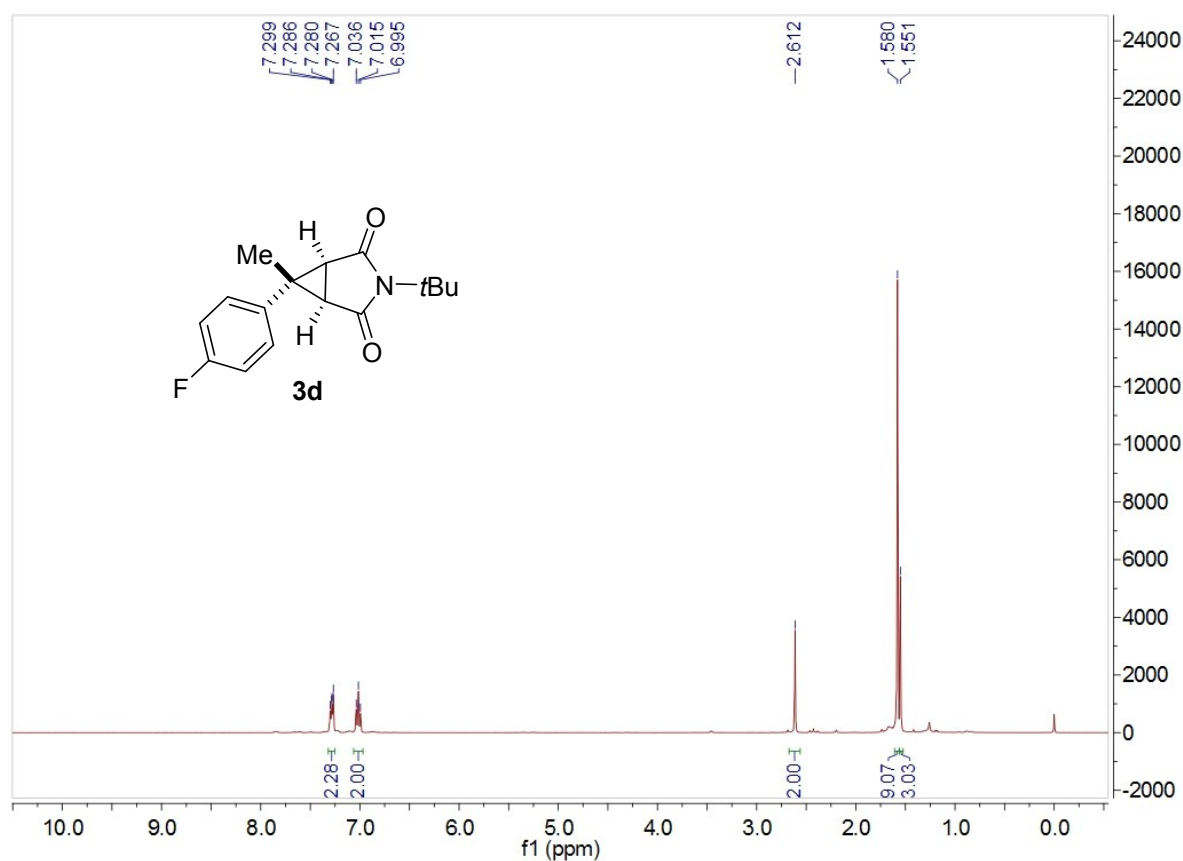

**<sup>13</sup>C NMR (100 MHz, CDCl<sub>3</sub>) spectrum for 3d**

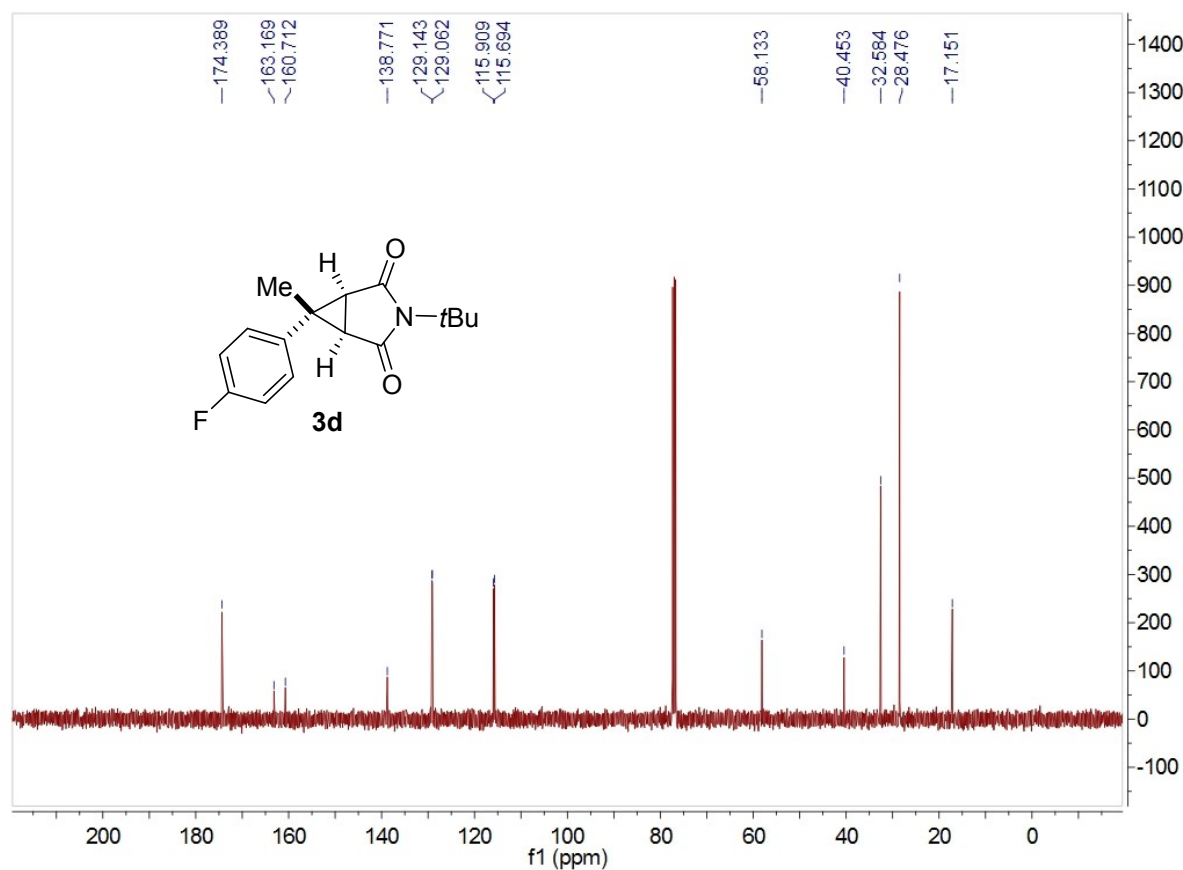



**<sup>19</sup>F NMR (376 MHz, CDCl<sub>3</sub>) spectrum for 3d**

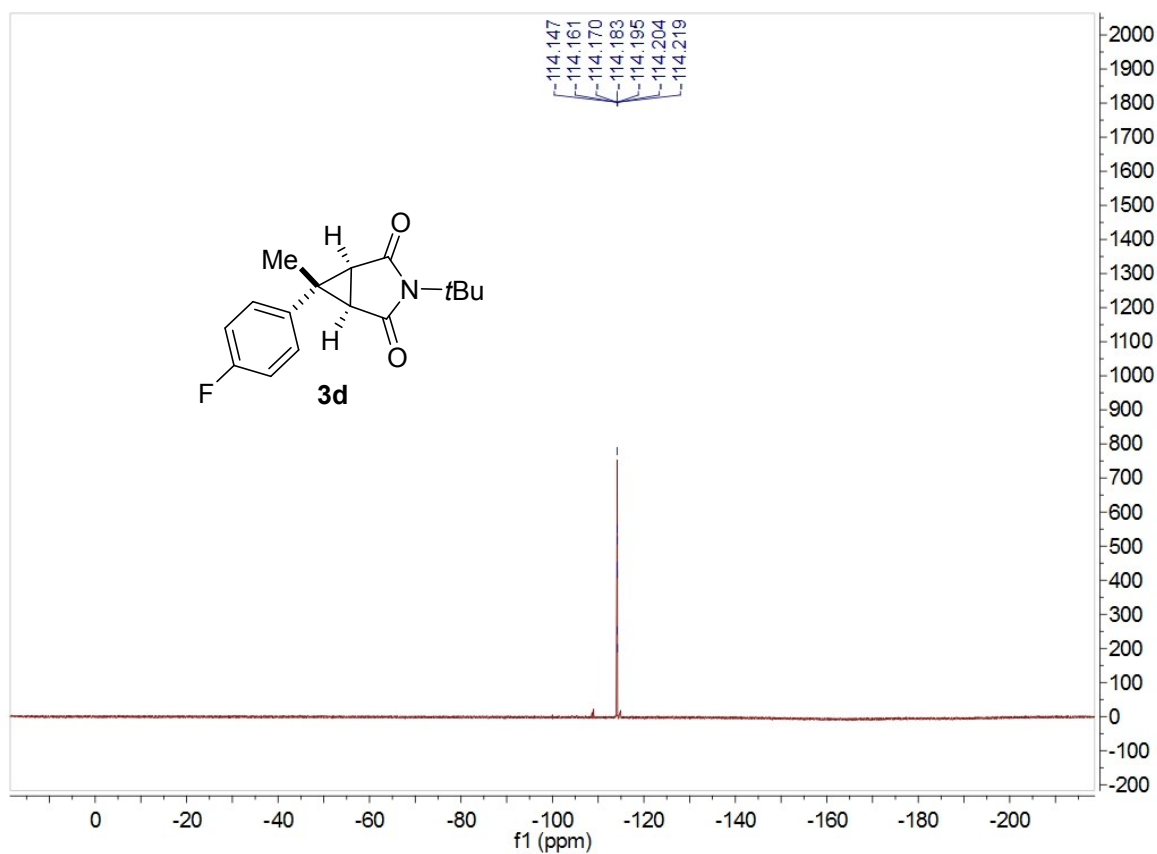

**<sup>1</sup>H NMR (400 MHz, CDCl<sub>3</sub>) spectrum for 3e**

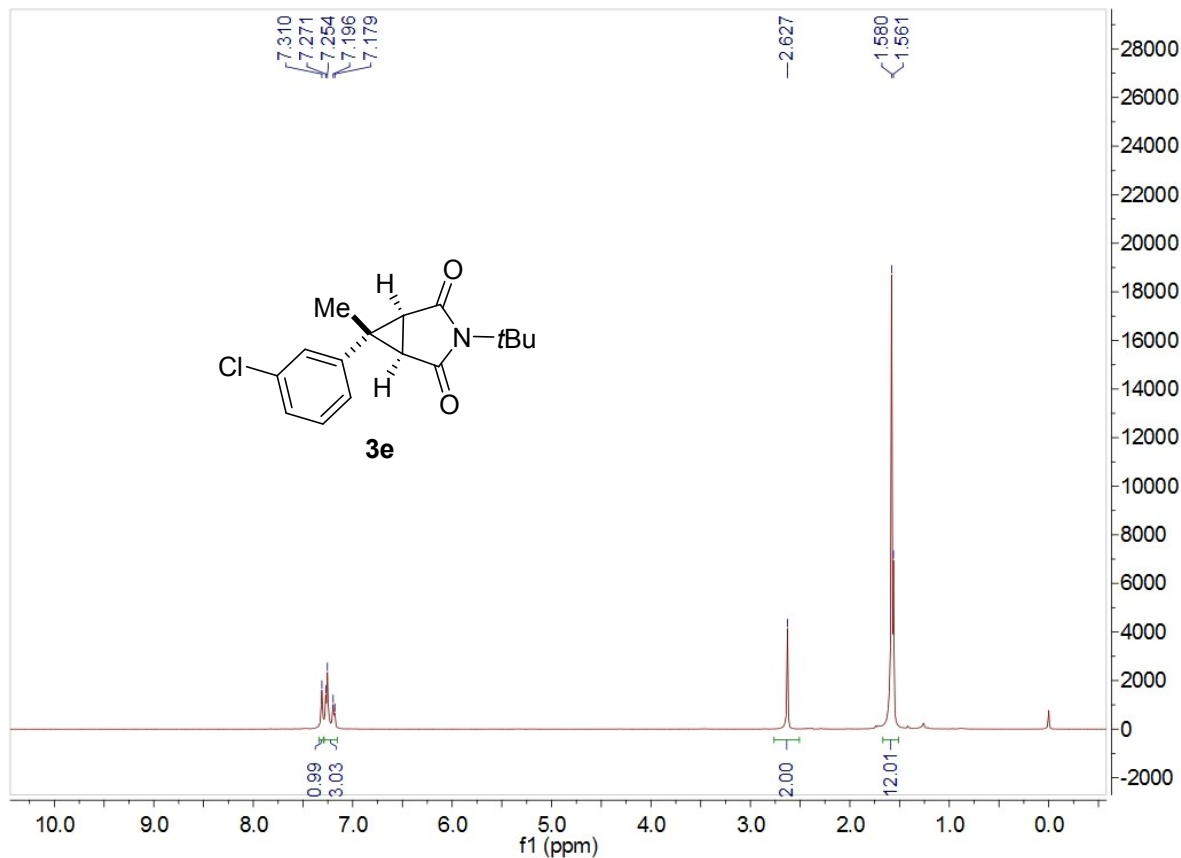

**<sup>13</sup>C NMR (100 MHz, CDCl<sub>3</sub>) spectrum for 3e**

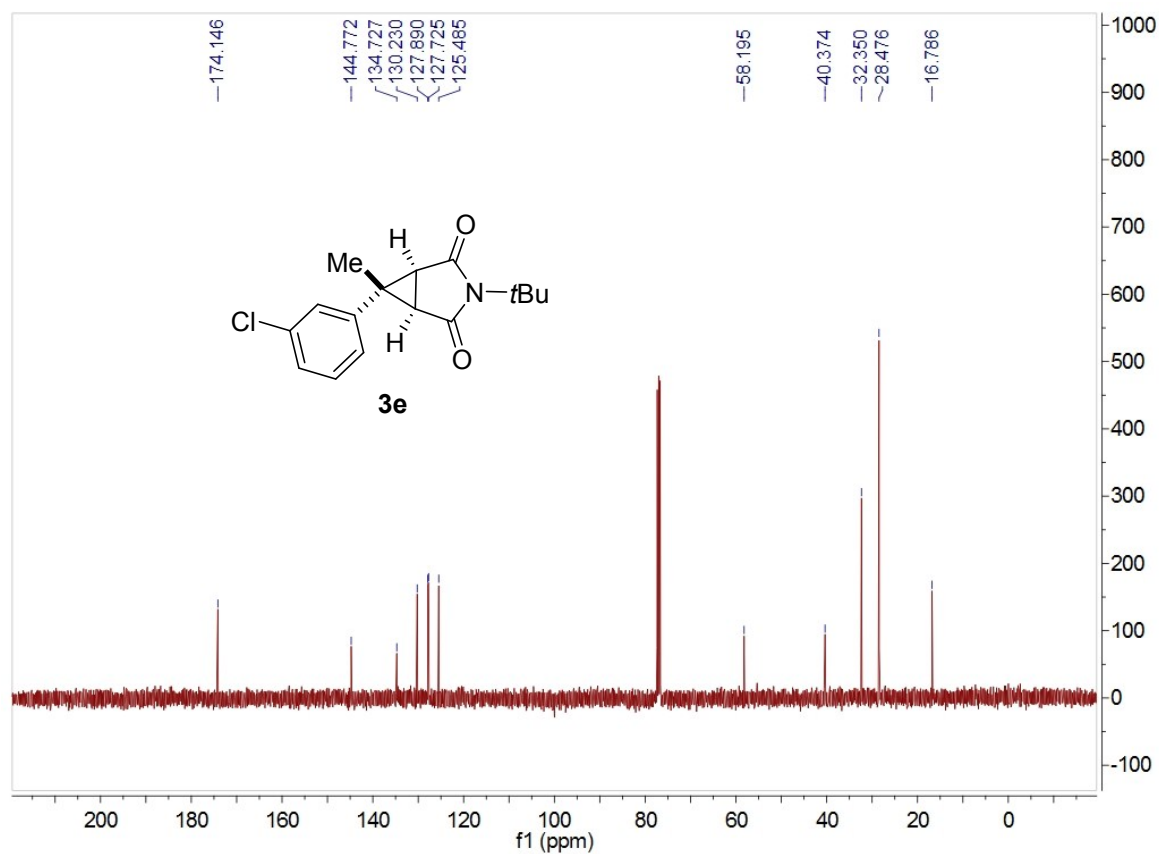

**<sup>1</sup>H NMR (400 MHz, CDCl<sub>3</sub>) spectrum for 3f**

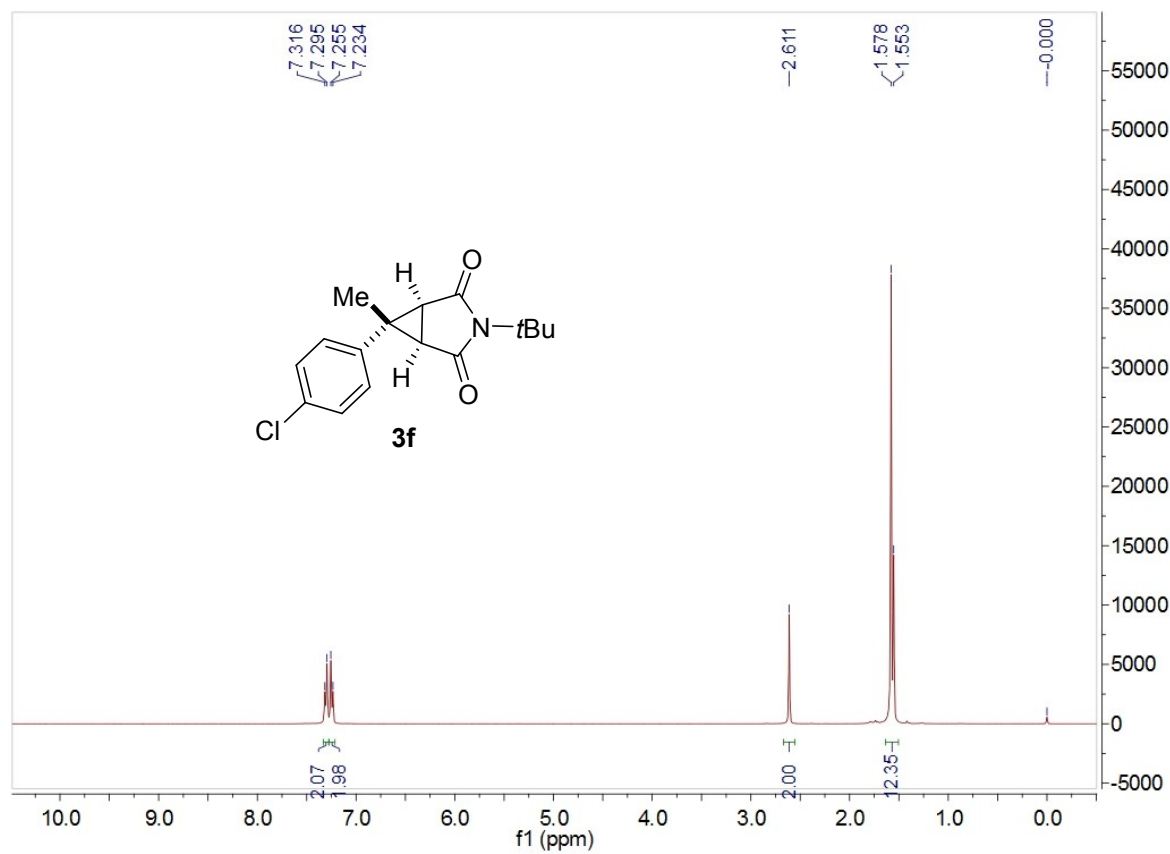

**<sup>13</sup>C NMR (100 MHz, CDCl<sub>3</sub>) spectrum for 3f**

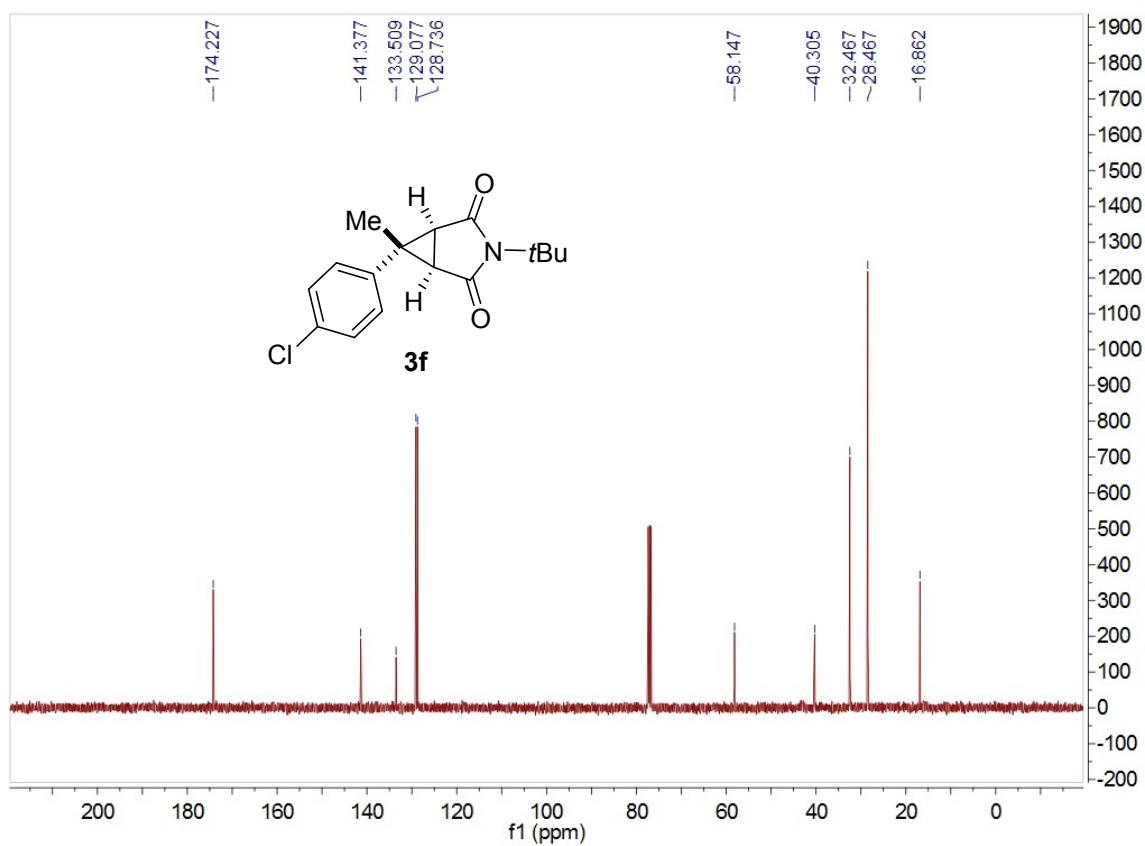

**<sup>1</sup>H NMR (400 MHz, CDCl<sub>3</sub>) spectrum for 3g**

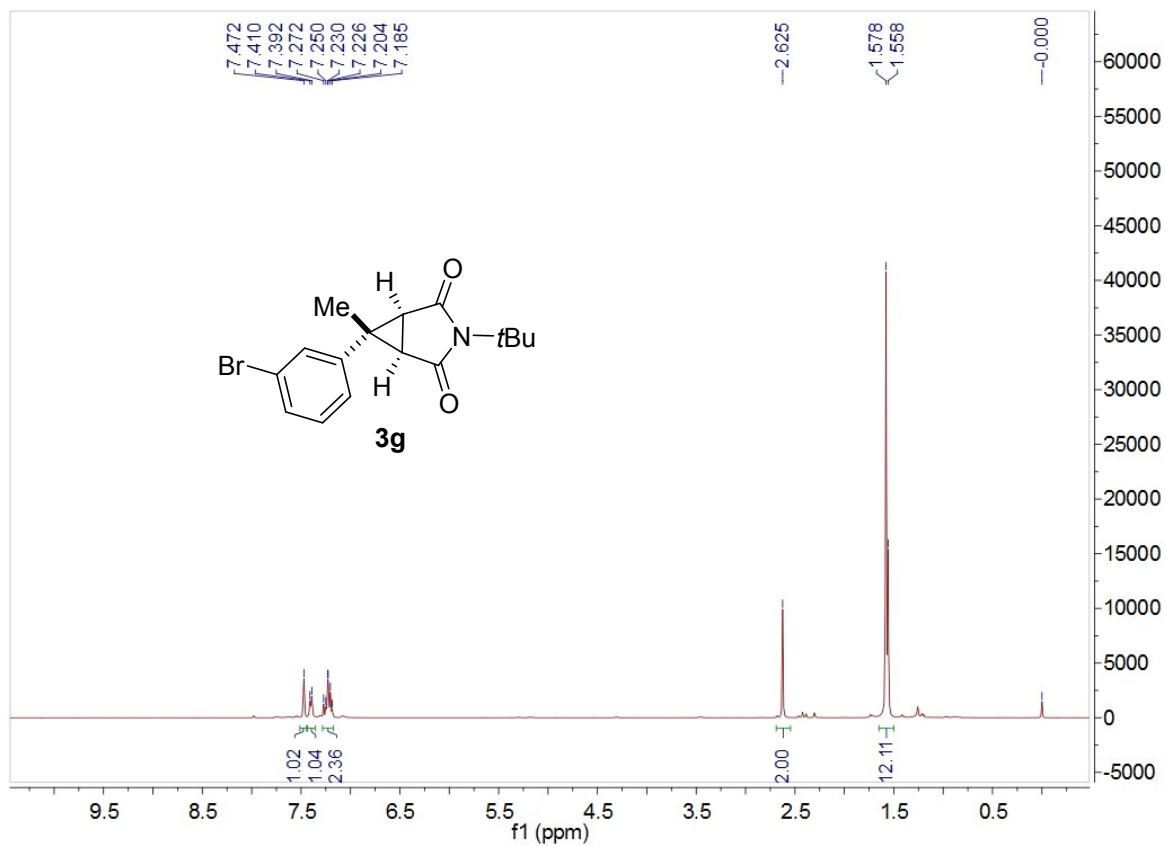

**<sup>13</sup>C NMR (100 MHz, CDCl<sub>3</sub>) spectrum for 3g**

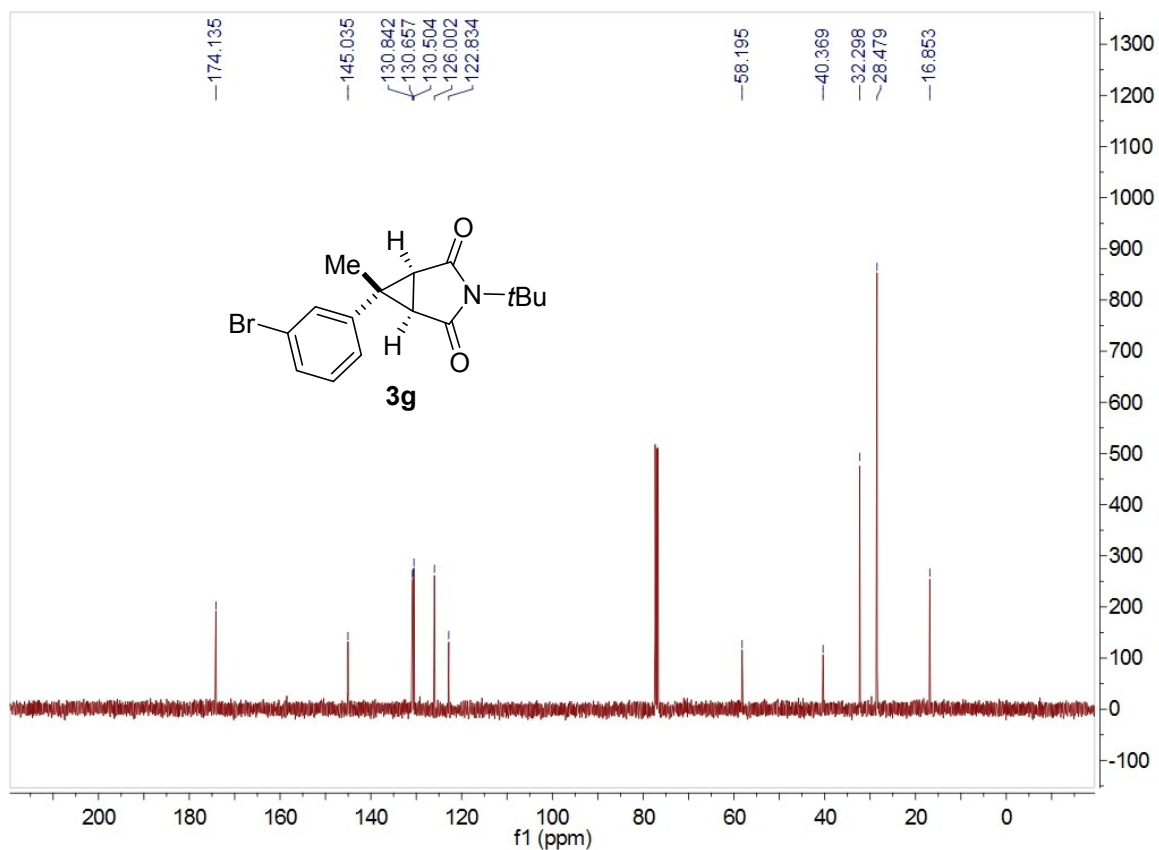

**<sup>1</sup>H NMR (400 MHz, CDCl<sub>3</sub>) spectrum for 3h**

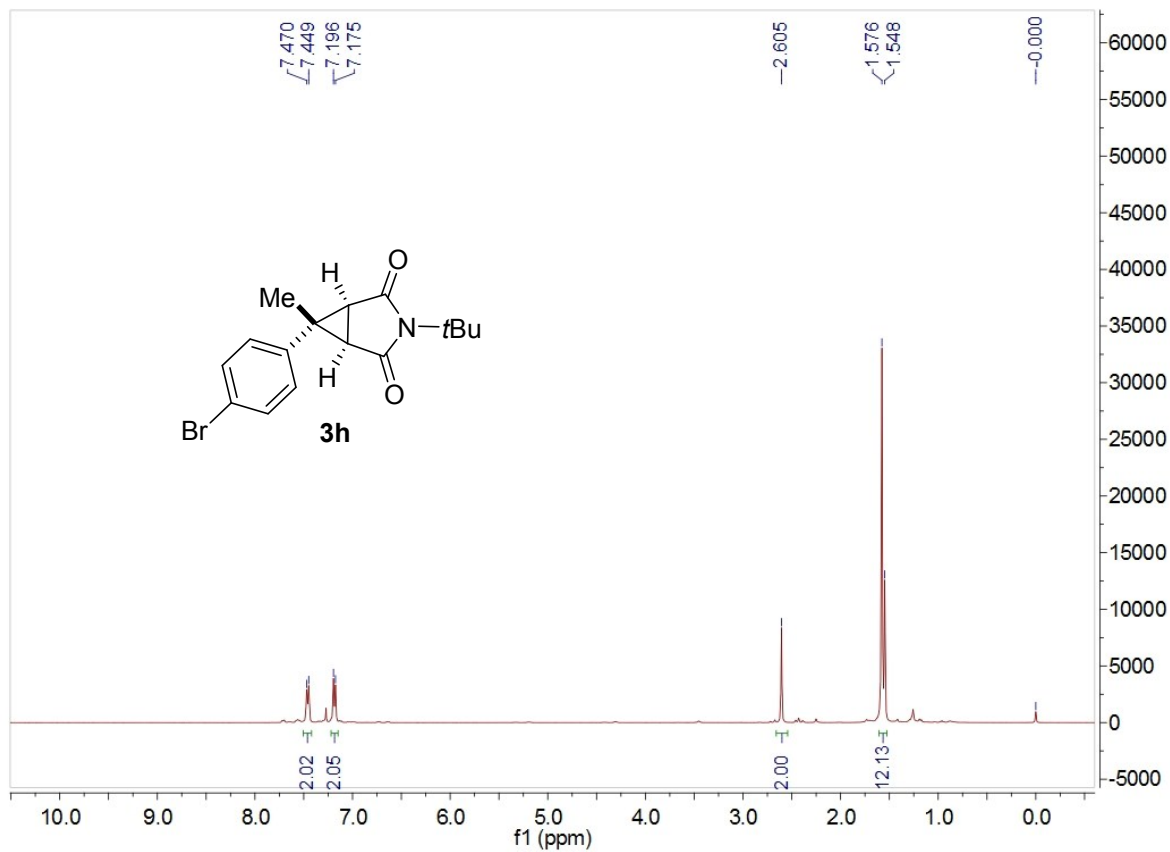

**<sup>13</sup>C NMR (100 MHz, CDCl<sub>3</sub>) spectrum for 3h**

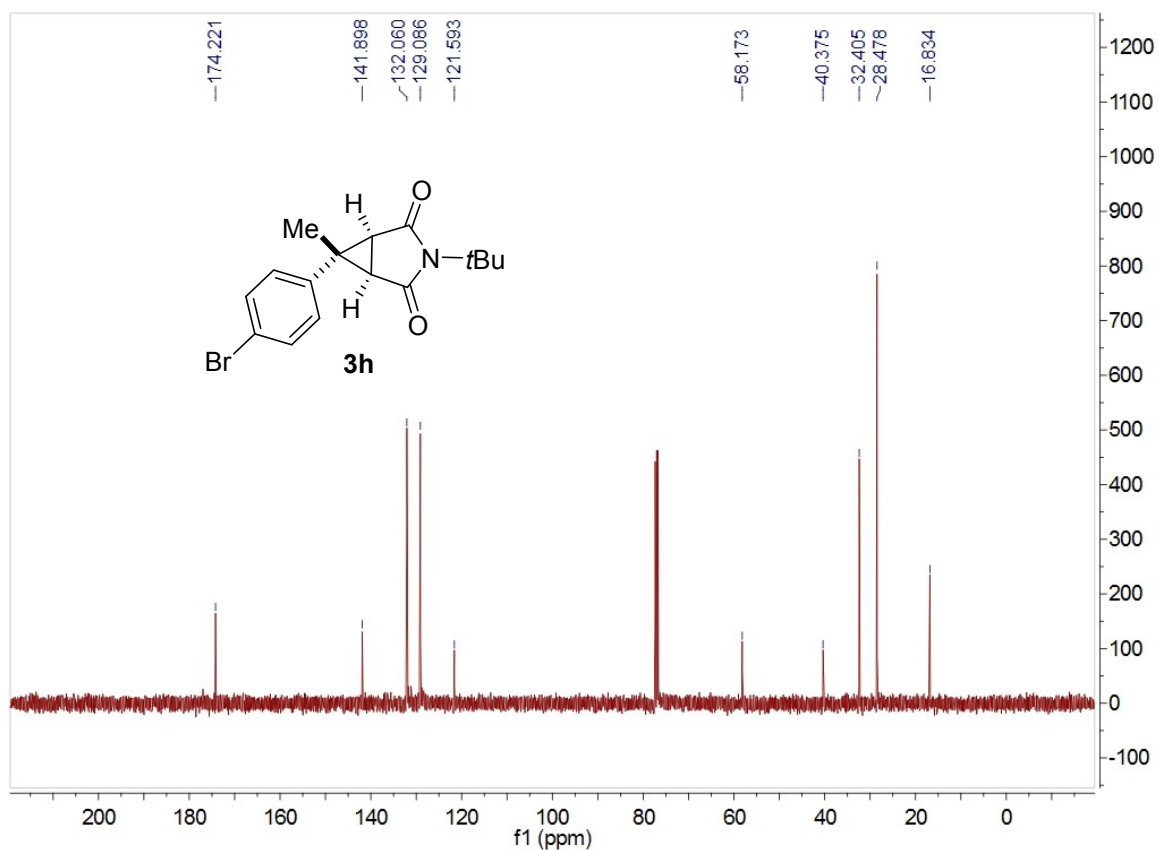

**<sup>1</sup>H NMR (400 MHz, CDCl<sub>3</sub>) spectrum for 3i**

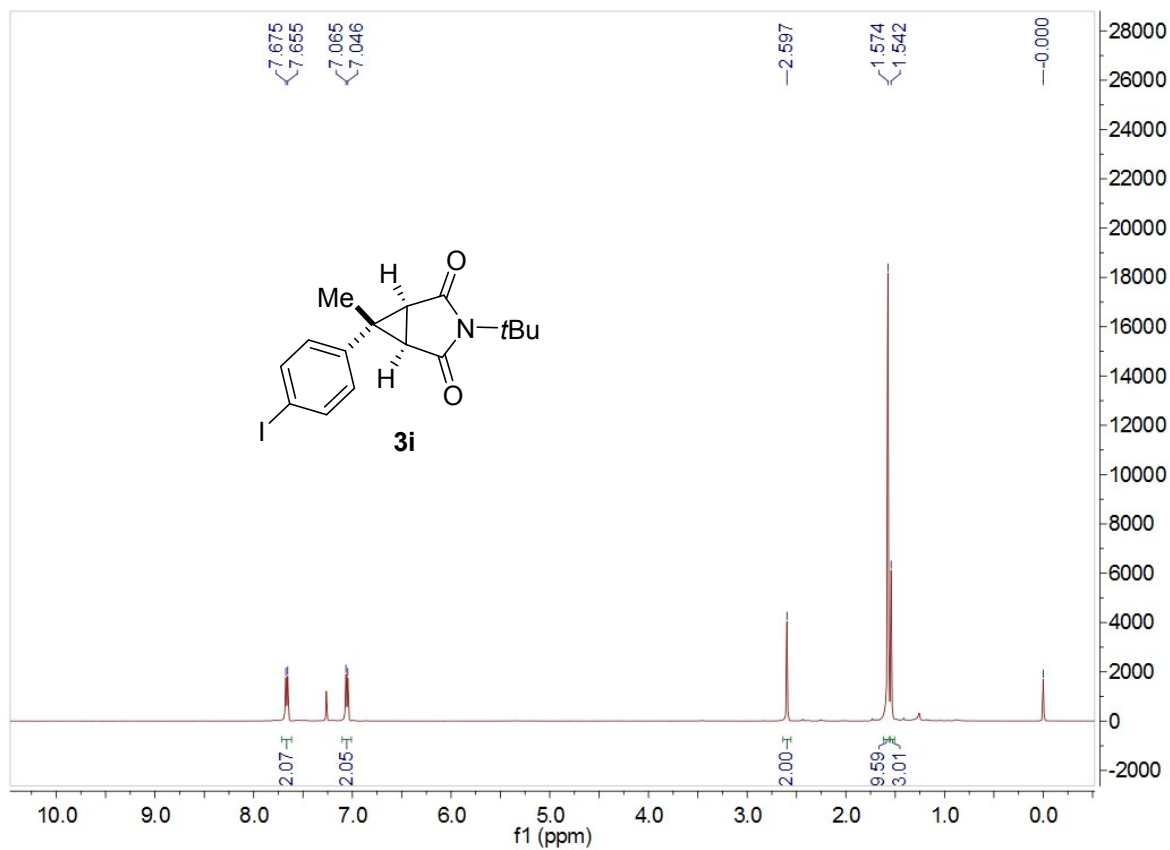

**<sup>13</sup>C NMR (100 MHz, CDCl<sub>3</sub>) spectrum for 3i**

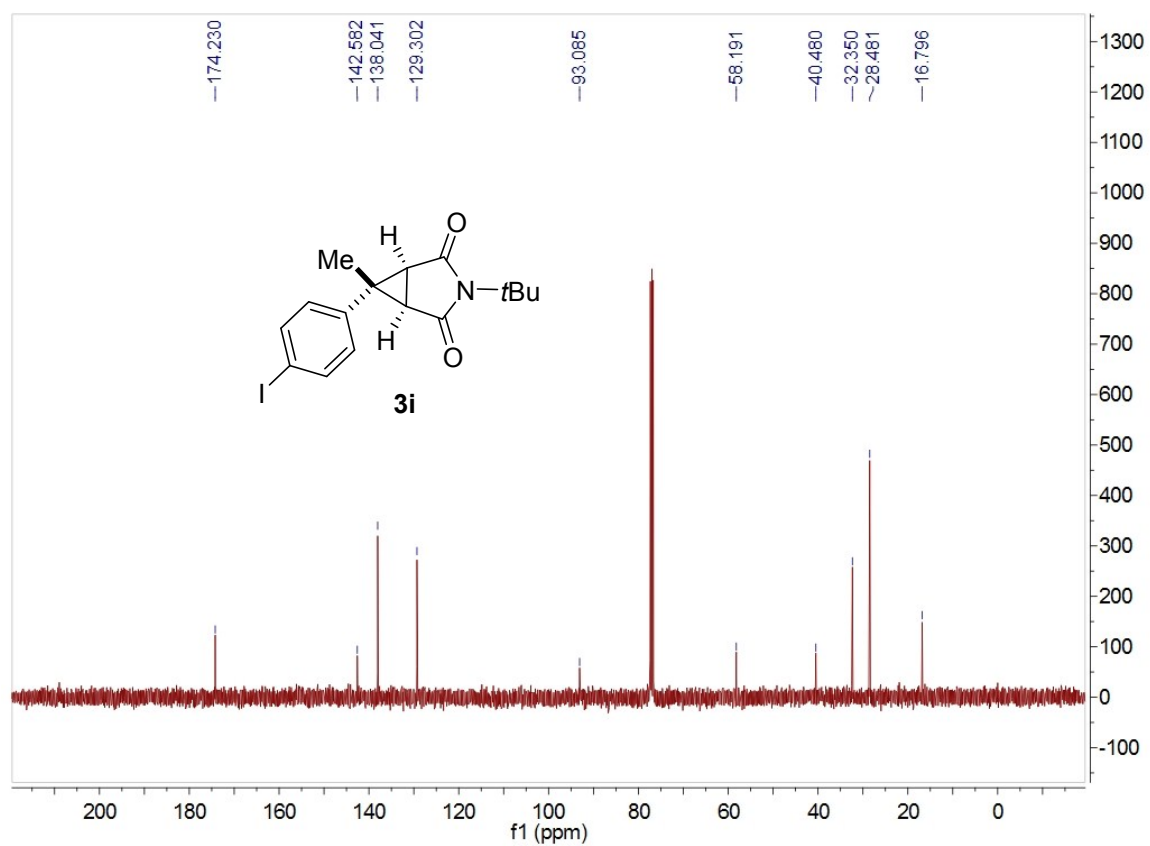

**<sup>1</sup>H NMR (400 MHz, CDCl<sub>3</sub>) spectrum for 3j**

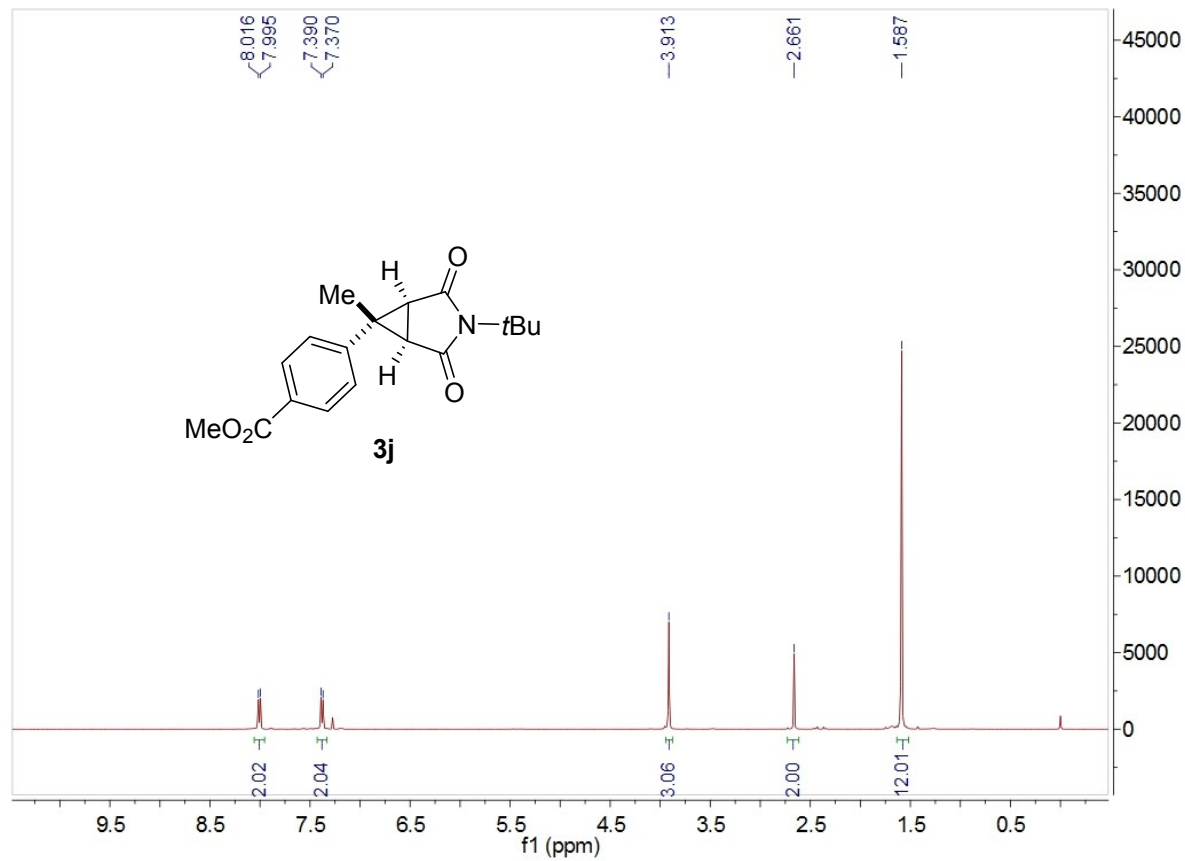

**<sup>13</sup>C NMR (100 MHz, CDCl<sub>3</sub>) spectrum for 3j**

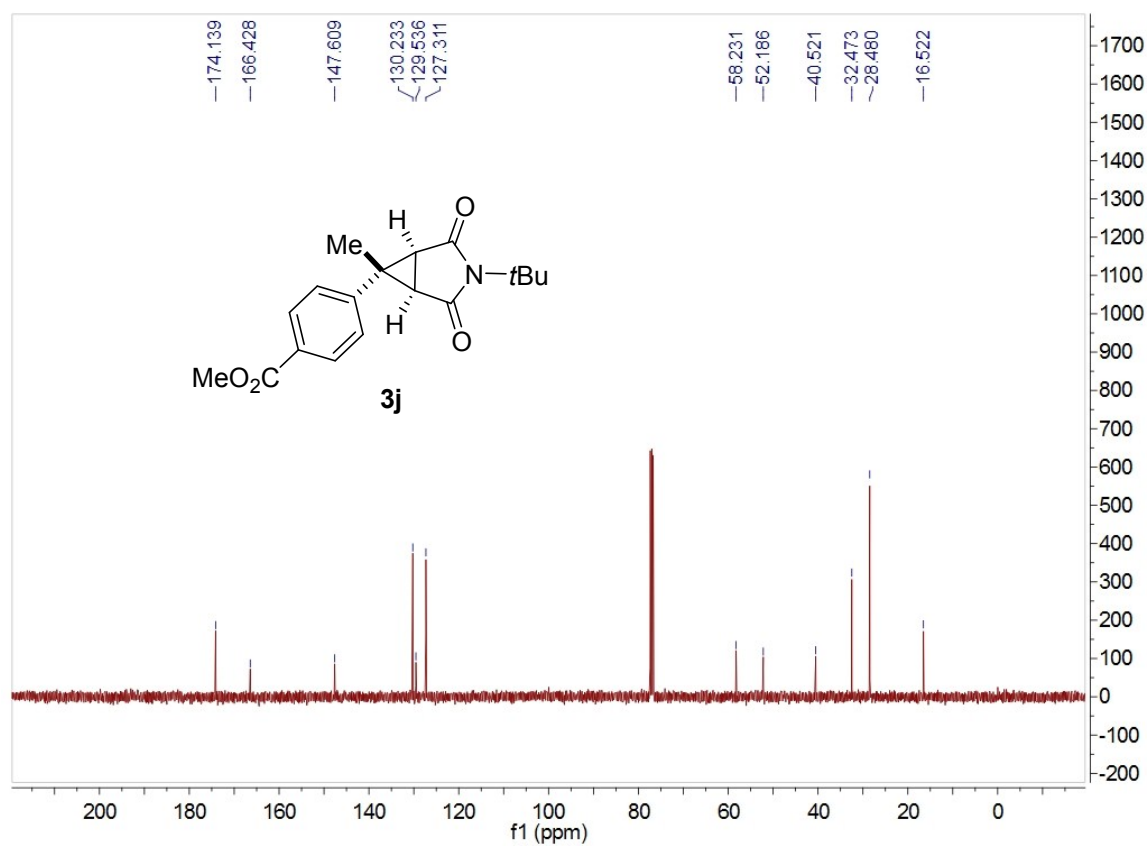

**<sup>1</sup>H NMR (400 MHz, CDCl<sub>3</sub>) spectrum for 3k**

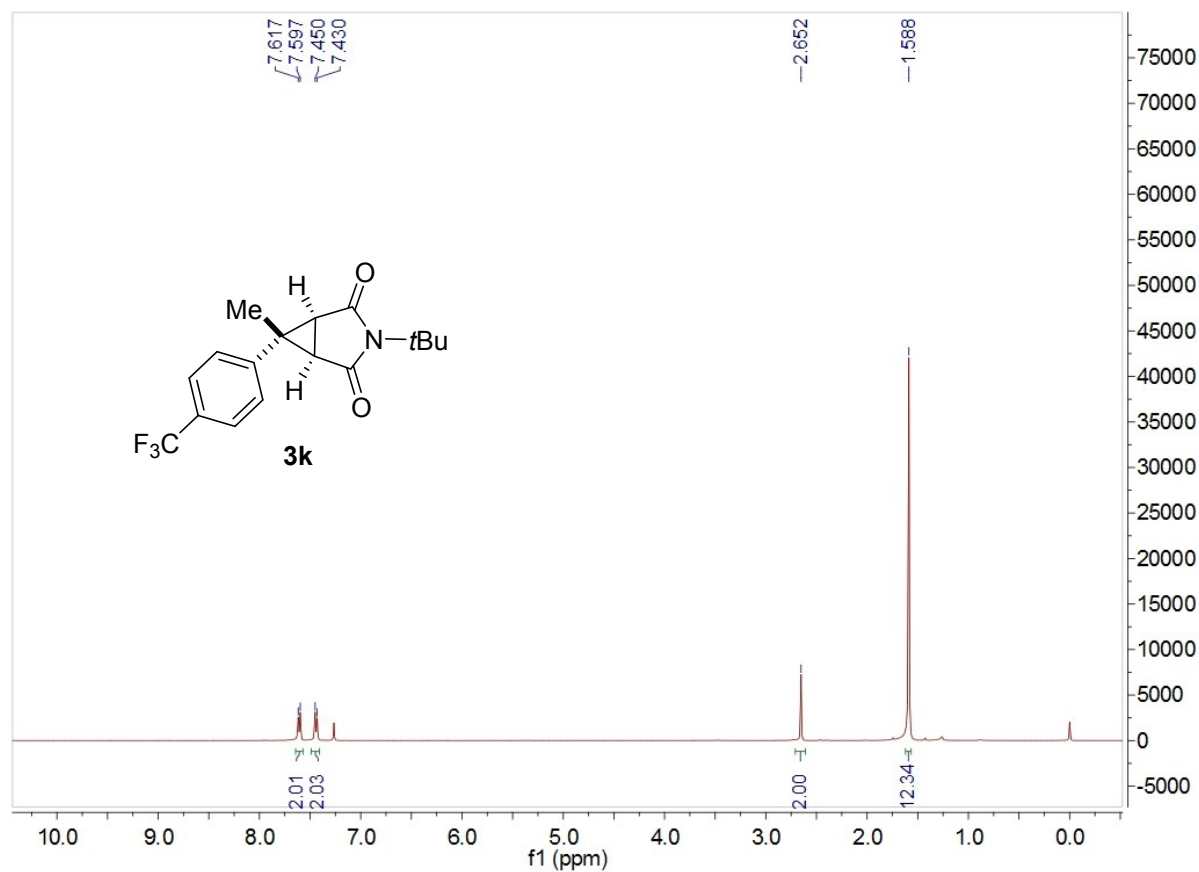

**<sup>13</sup>C NMR (100 MHz, CDCl<sub>3</sub>) spectrum for 3k**

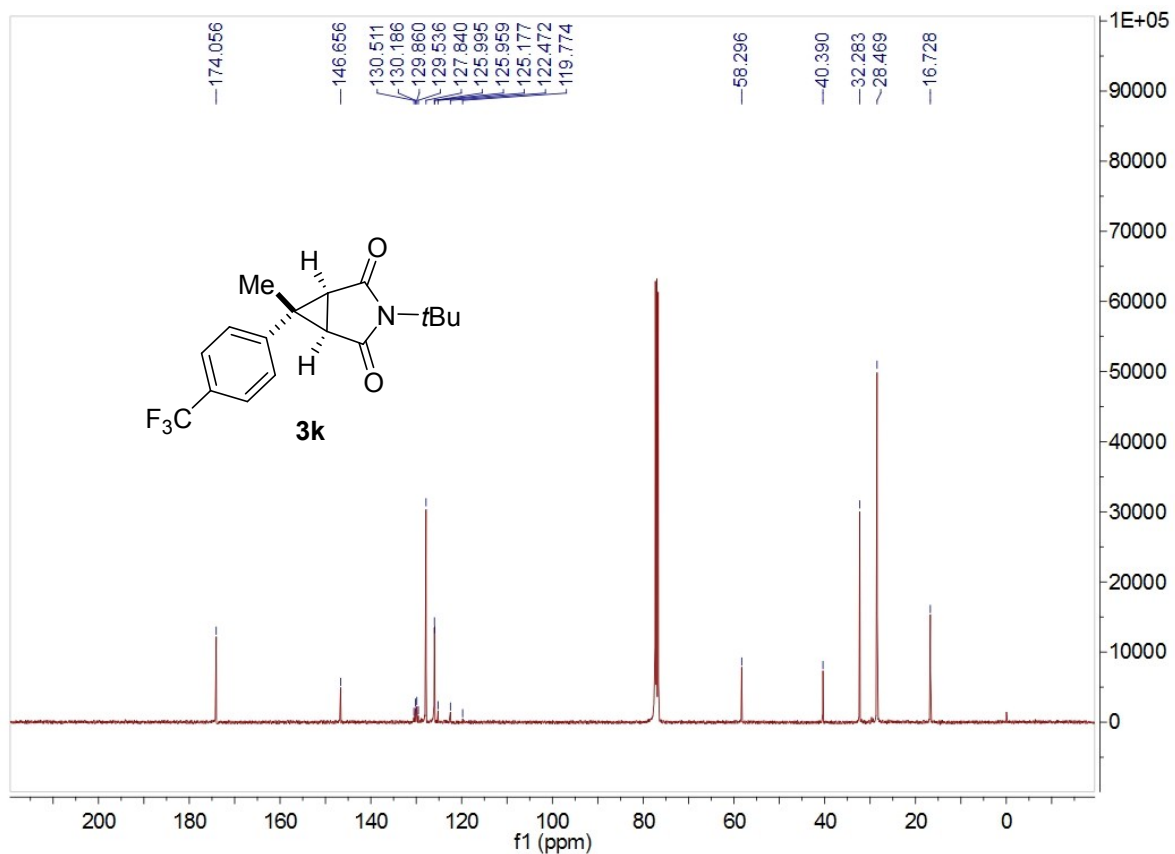

**<sup>19</sup>F NMR (376 MHz, CDCl<sub>3</sub>) spectrum for 3k**

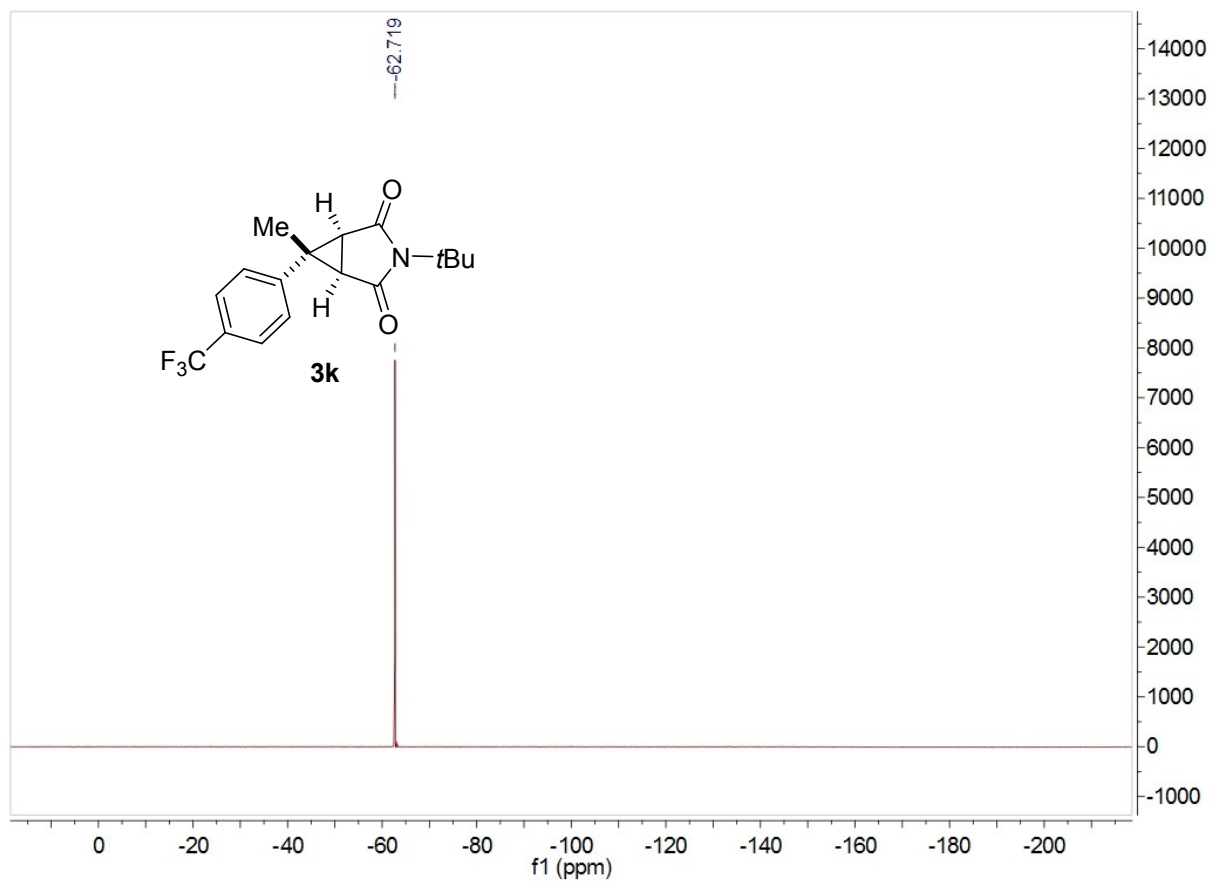



**<sup>1</sup>H NMR (400 MHz, CDCl<sub>3</sub>) spectrum for 3I**

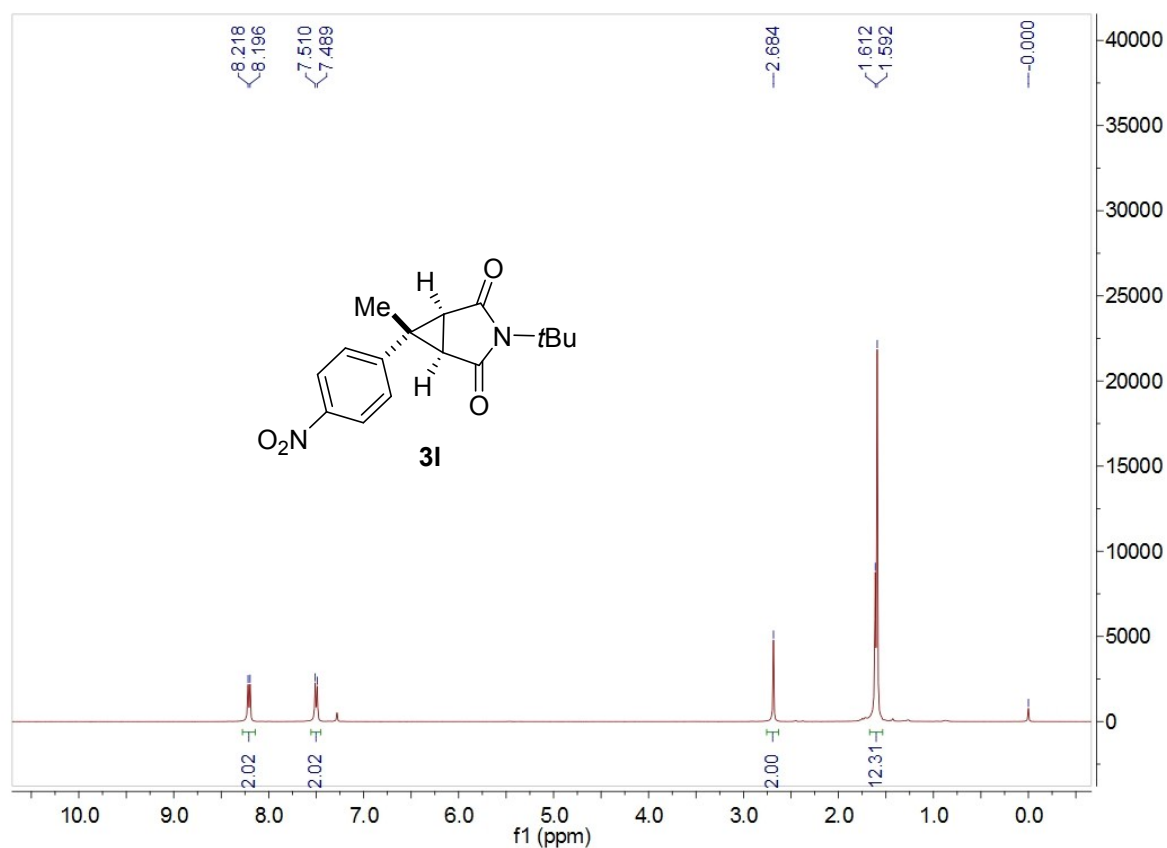

**<sup>13</sup>C NMR (100 MHz, CDCl<sub>3</sub>) spectrum for 3I**

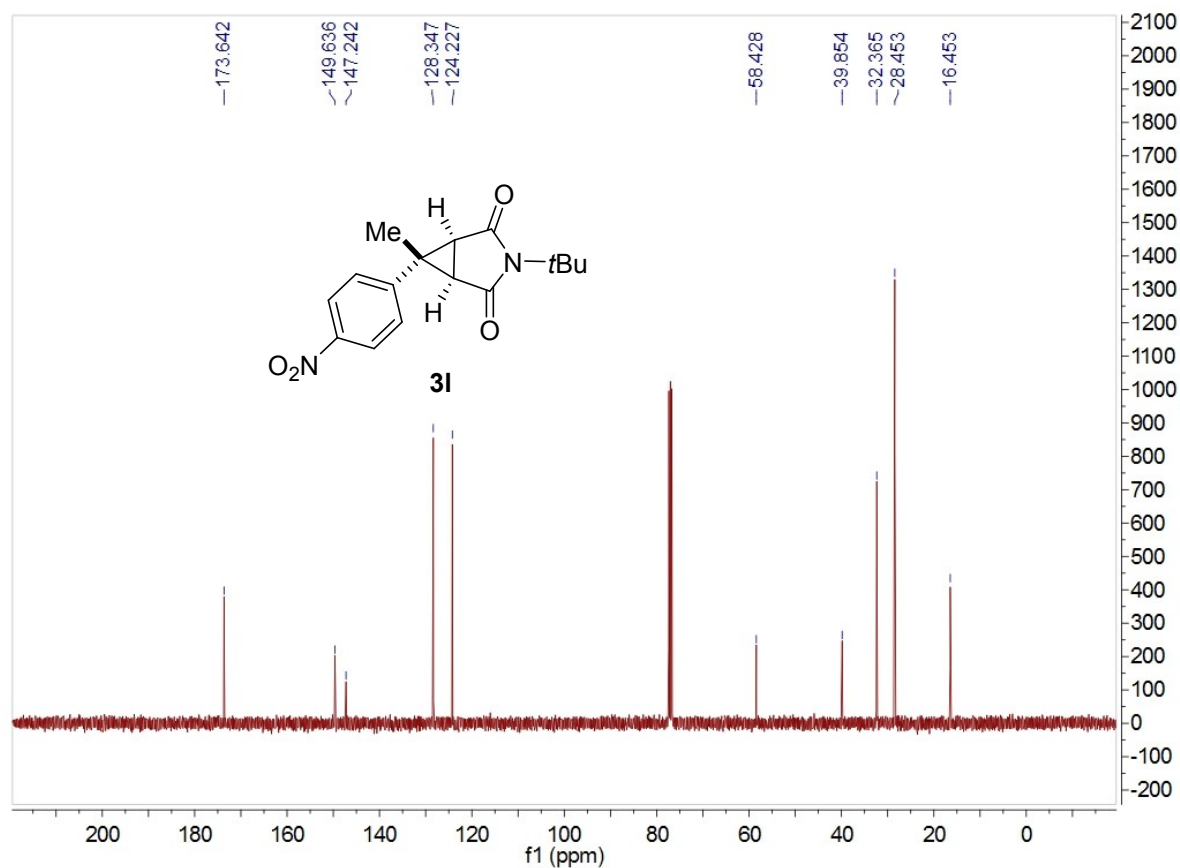

**<sup>1</sup>H NMR (400 MHz, CDCl<sub>3</sub>) spectrum for 3m**

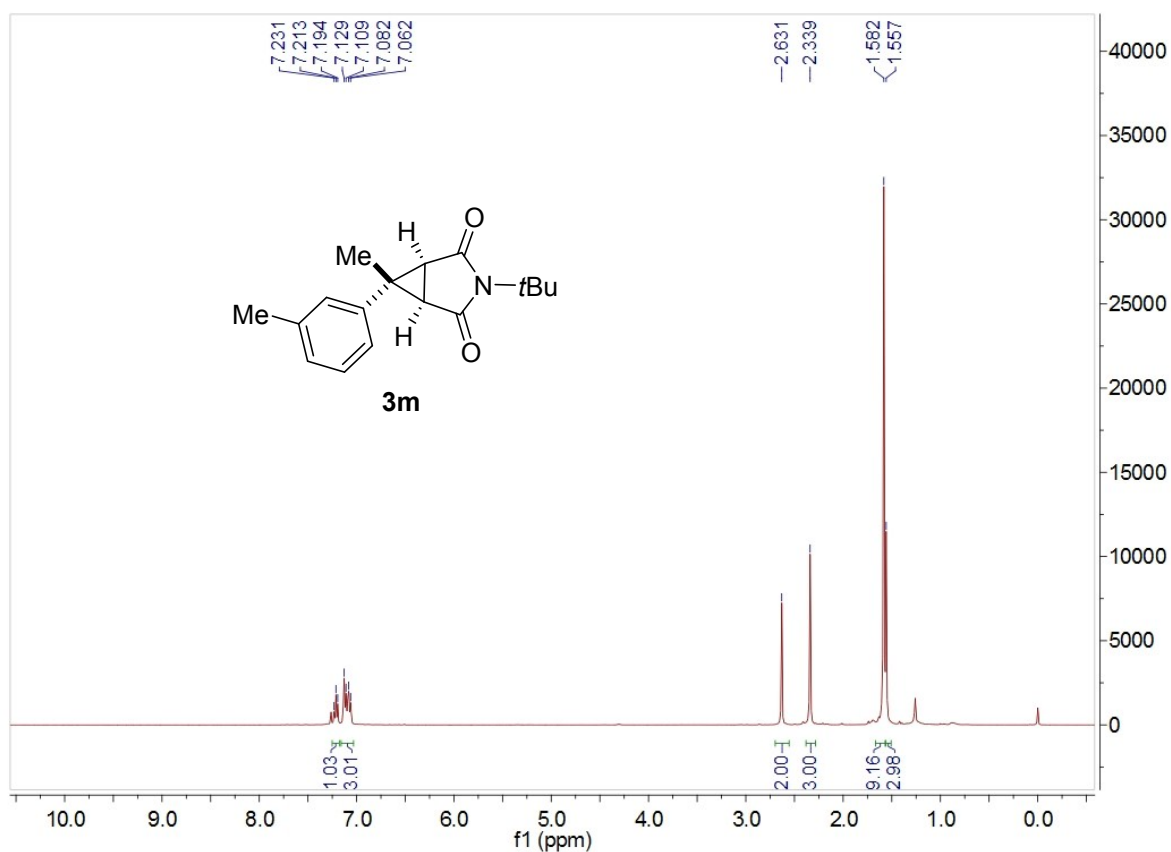

**<sup>13</sup>C NMR (100 MHz, CDCl<sub>3</sub>) spectrum for 3m**

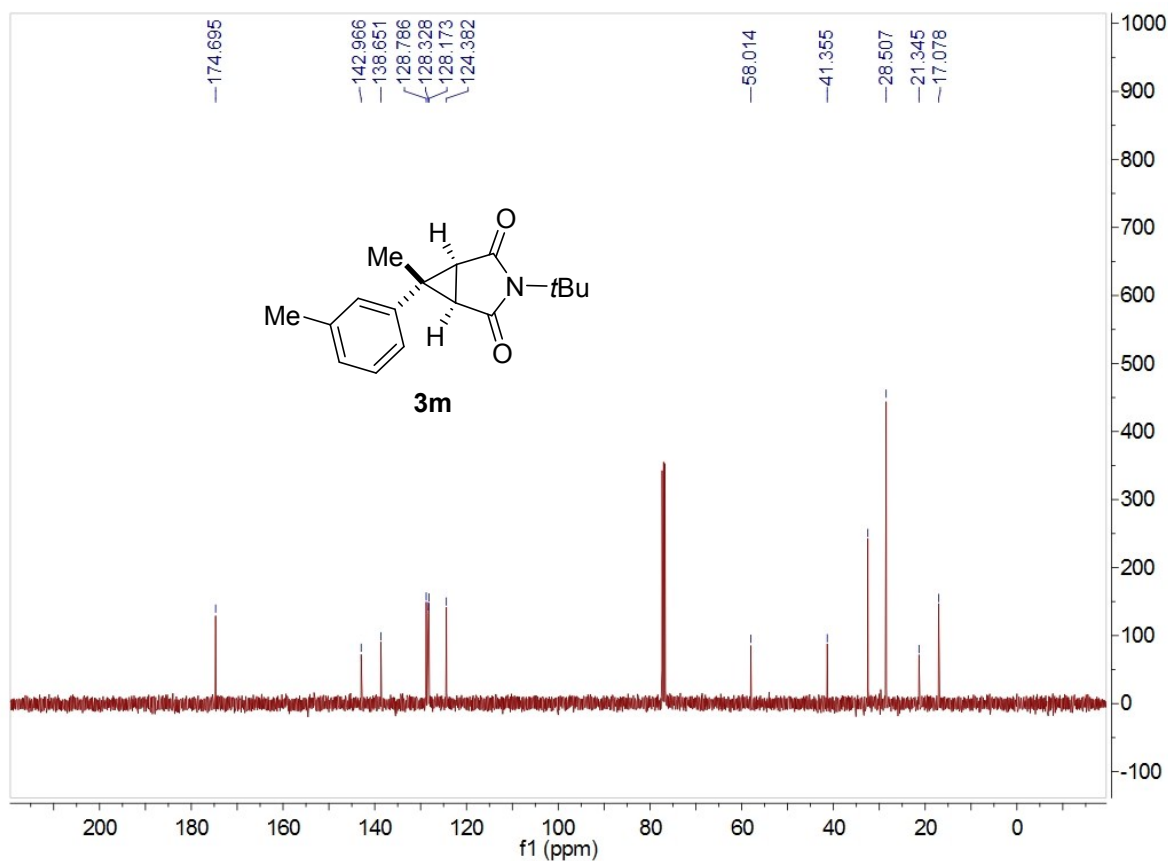

**<sup>1</sup>H NMR (400 MHz, CDCl<sub>3</sub>) spectrum for 3n**

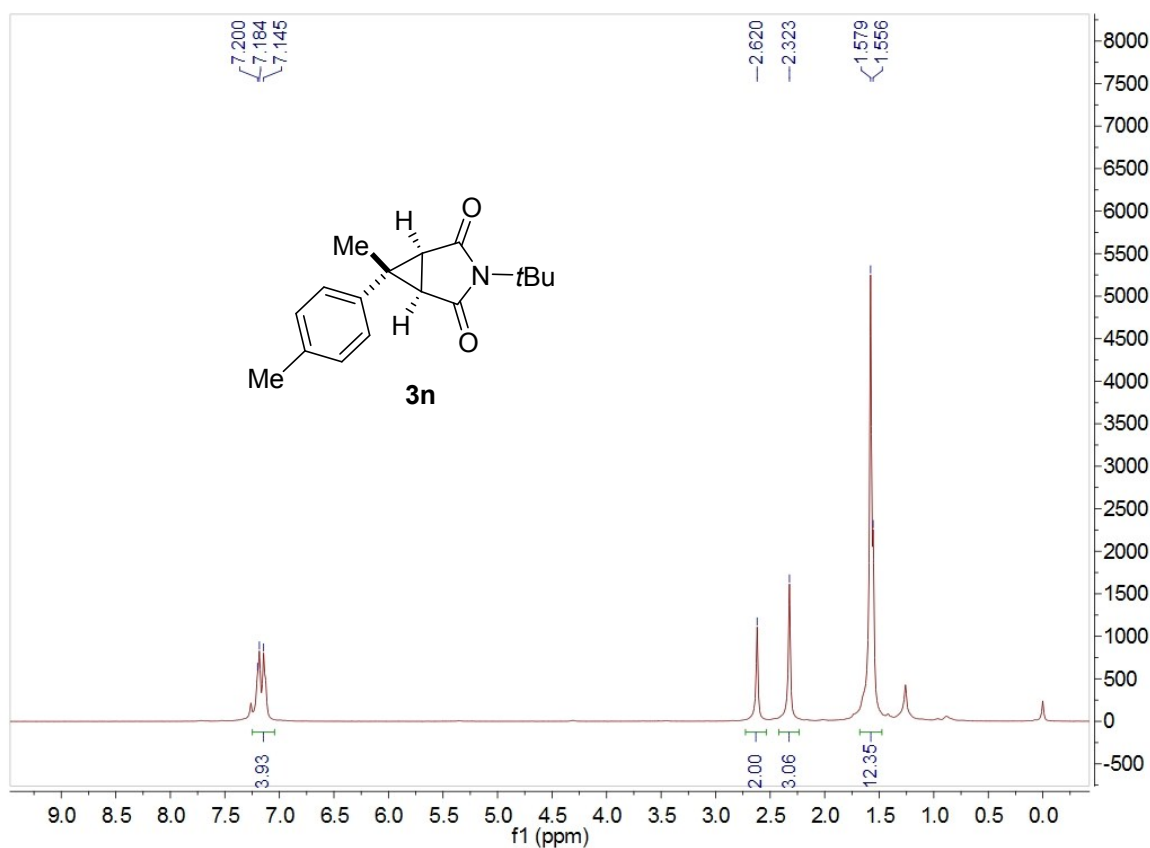

**<sup>13</sup>C NMR (100 MHz, CDCl<sub>3</sub>) spectrum for 3n**

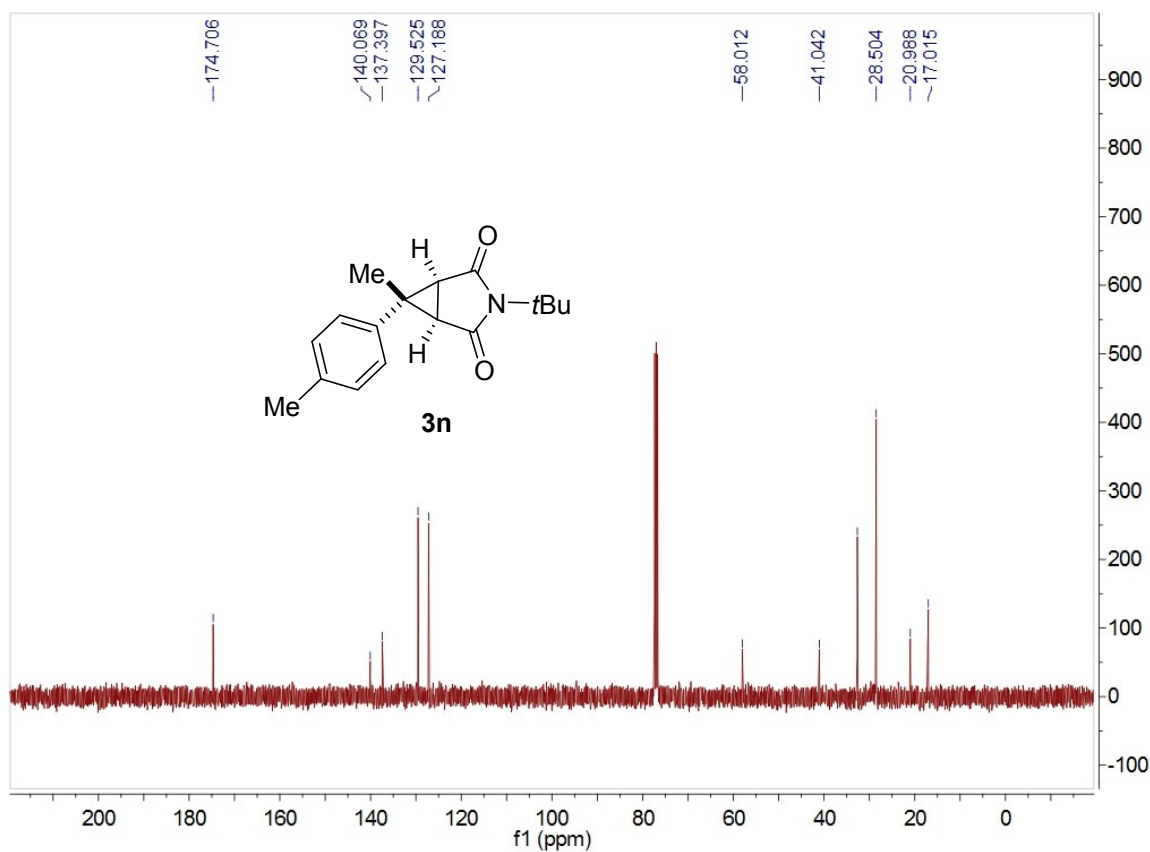

**<sup>1</sup>H NMR (400 MHz, CDCl<sub>3</sub>) spectrum for 3o**

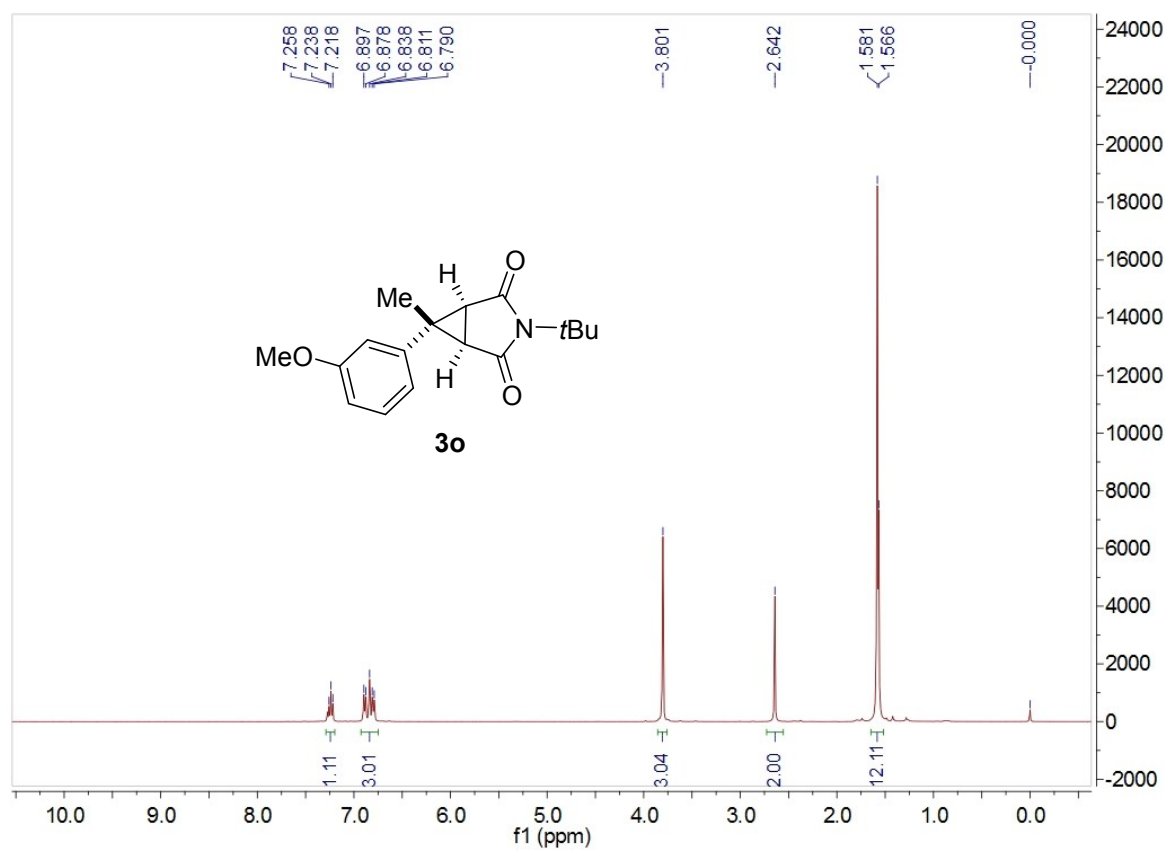

**<sup>13</sup>C NMR (100 MHz, CDCl<sub>3</sub>) spectrum for 3o**

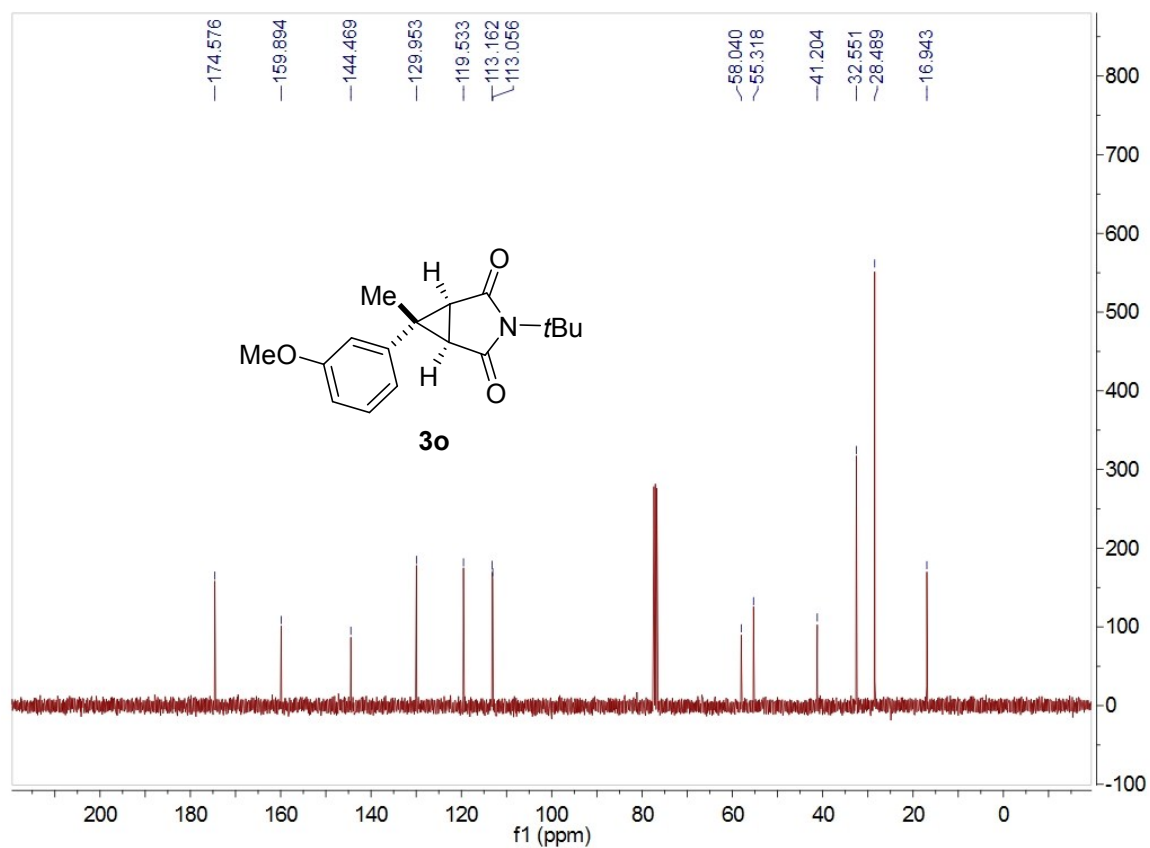

**<sup>1</sup>H NMR (400 MHz, CDCl<sub>3</sub>) spectrum for 3p**

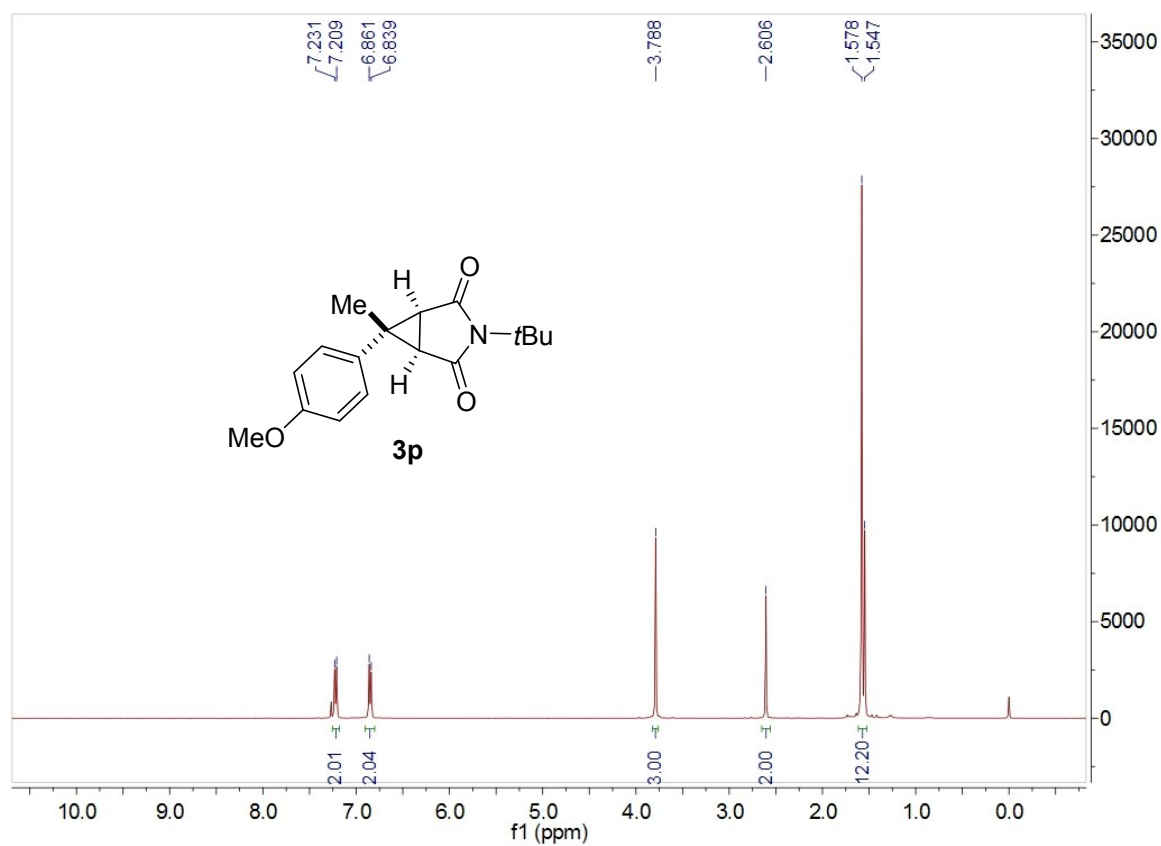

**<sup>13</sup>C NMR (100 MHz, CDCl<sub>3</sub>) spectrum for 3p**

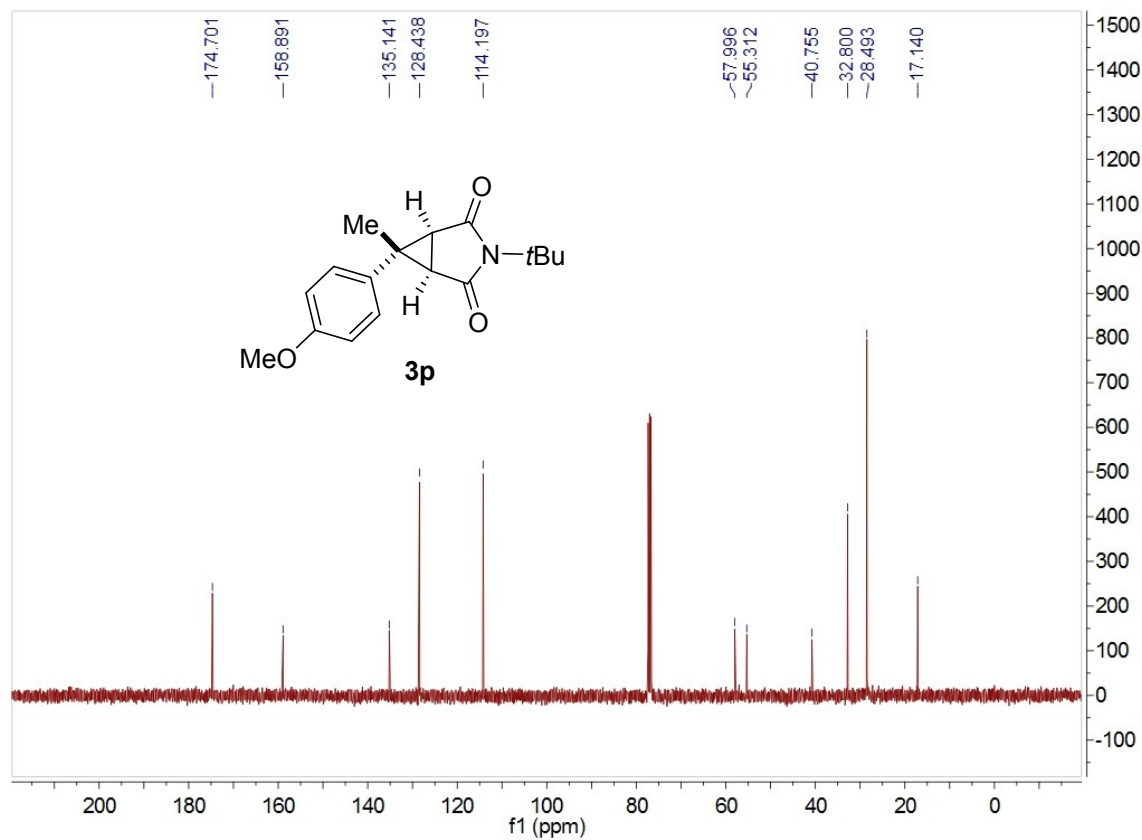

**<sup>1</sup>H NMR (400 MHz, CDCl<sub>3</sub>) spectrum for 3q**

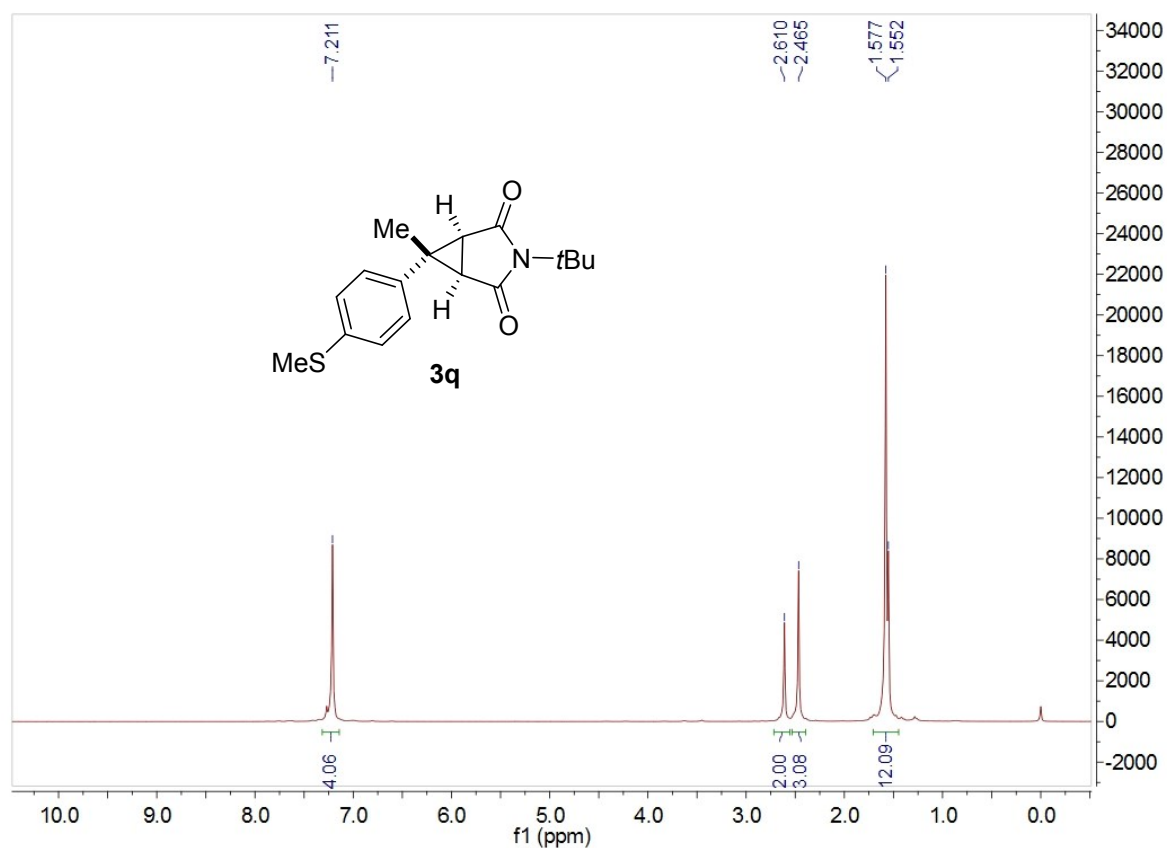

**<sup>13</sup>C NMR (100 MHz, CDCl<sub>3</sub>) spectrum for 3q**

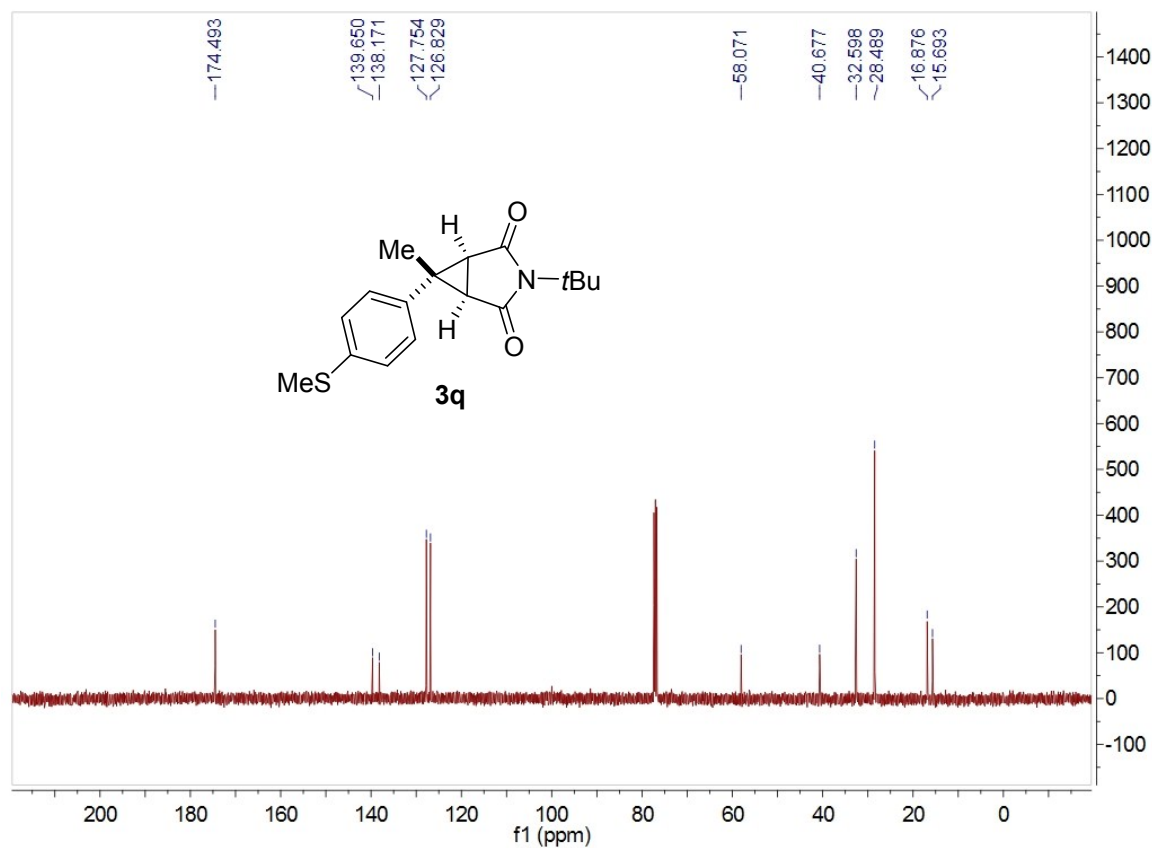

**<sup>1</sup>H NMR (400 MHz, CDCl<sub>3</sub>) spectrum for 3r**

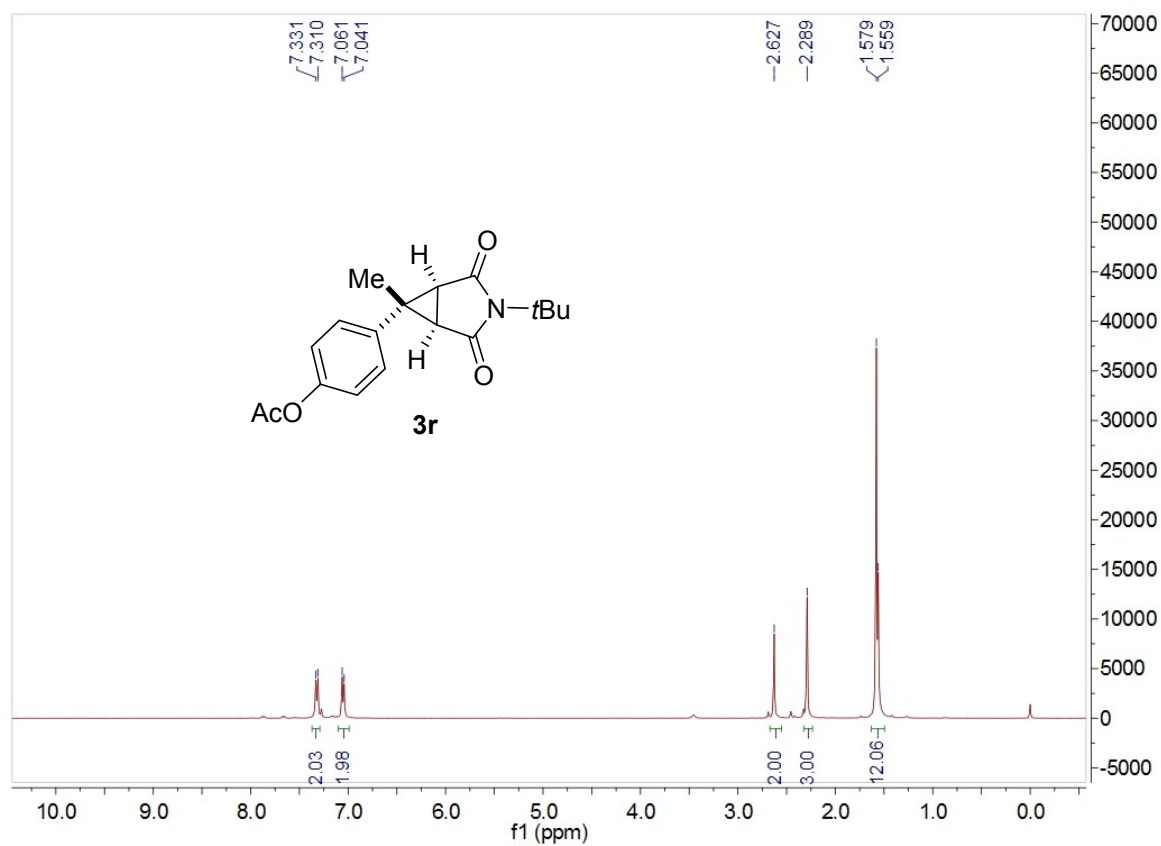

**<sup>13</sup>C NMR (100 MHz, CDCl<sub>3</sub>) spectrum for 3r**

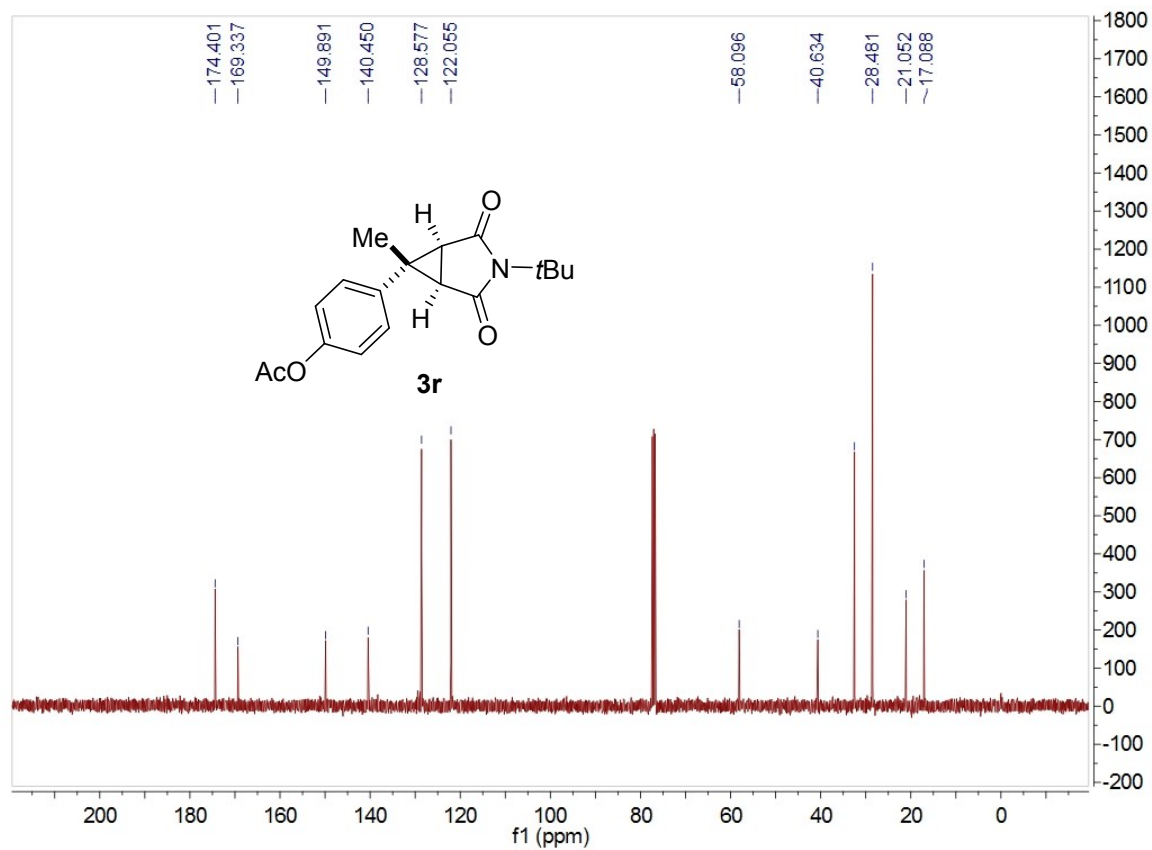

**<sup>1</sup>H NMR (400 MHz, CDCl<sub>3</sub>) spectrum for 3s**

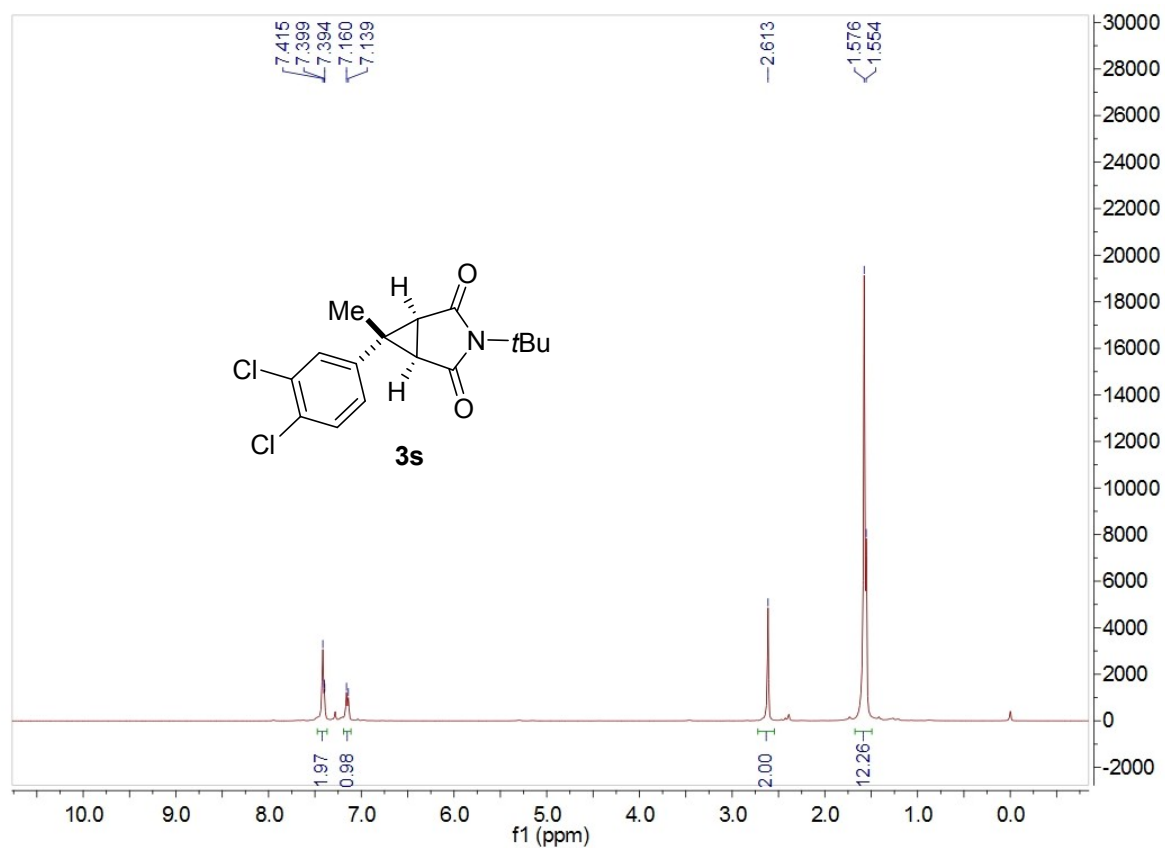

**<sup>13</sup>C NMR (100 MHz, CDCl<sub>3</sub>) spectrum for 3s**

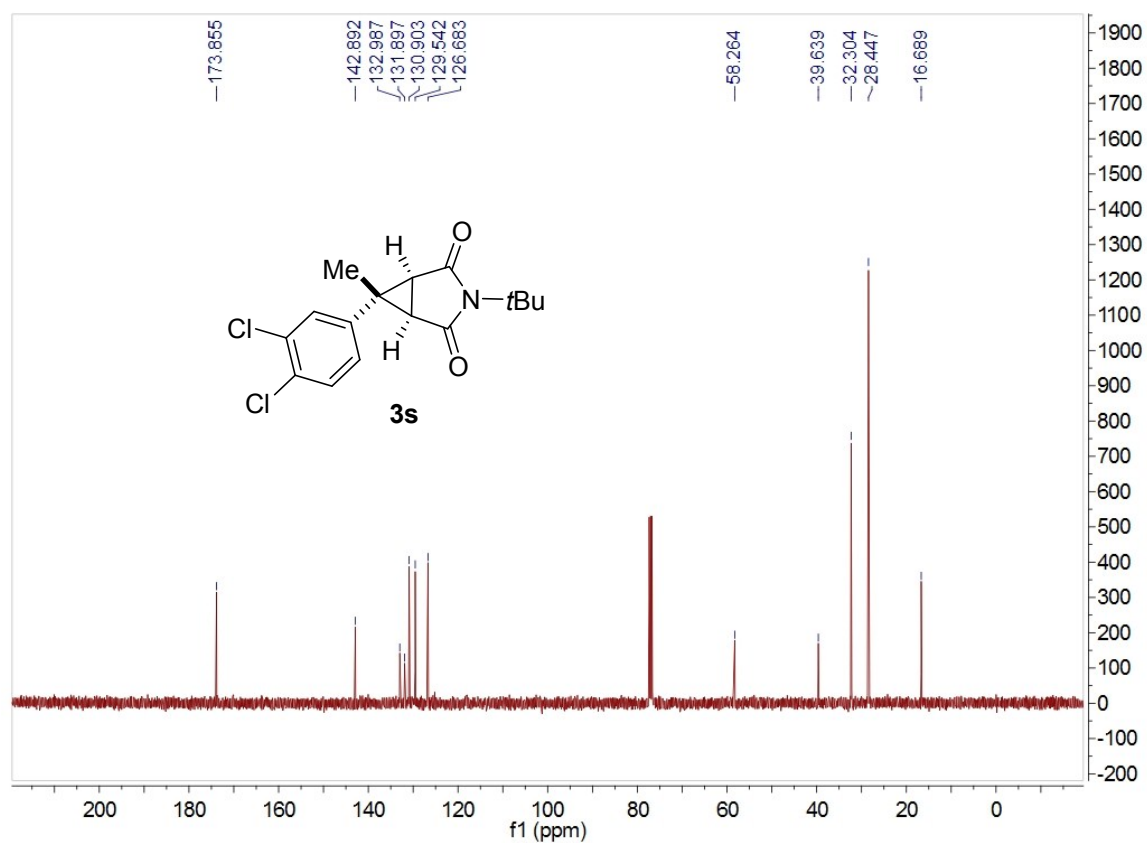



**<sup>1</sup>H NMR (400 MHz, CDCl<sub>3</sub>) spectrum for 3t**

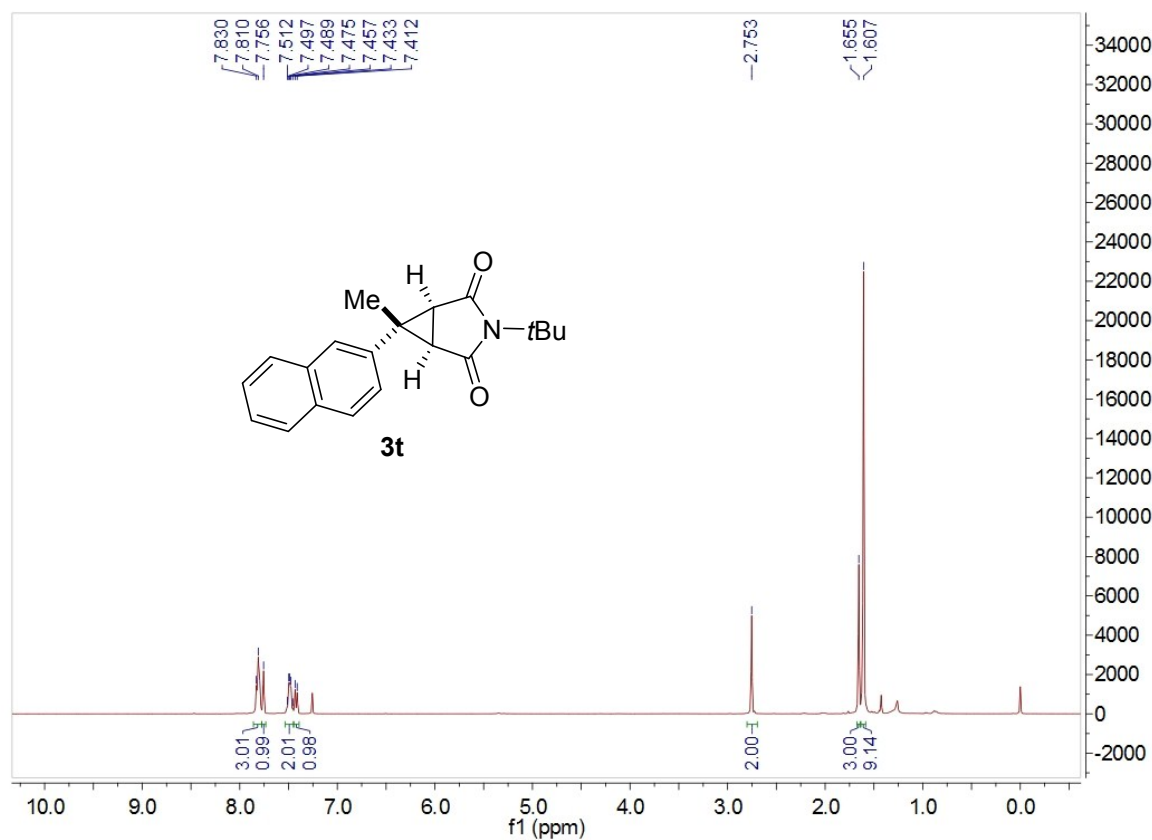

**<sup>13</sup>C NMR (100 MHz, CDCl<sub>3</sub>) spectrum for 3t**

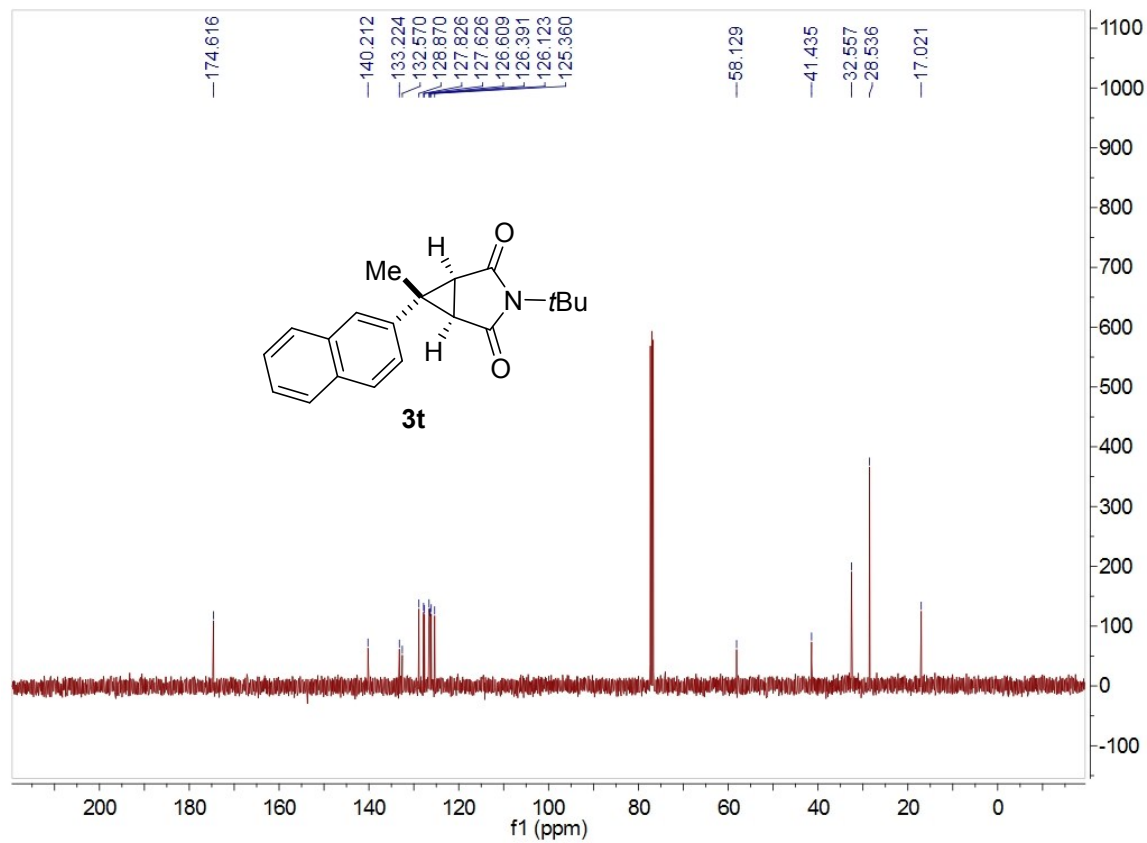

**<sup>1</sup>H NMR (400 MHz, CDCl<sub>3</sub>) spectrum for 3u**

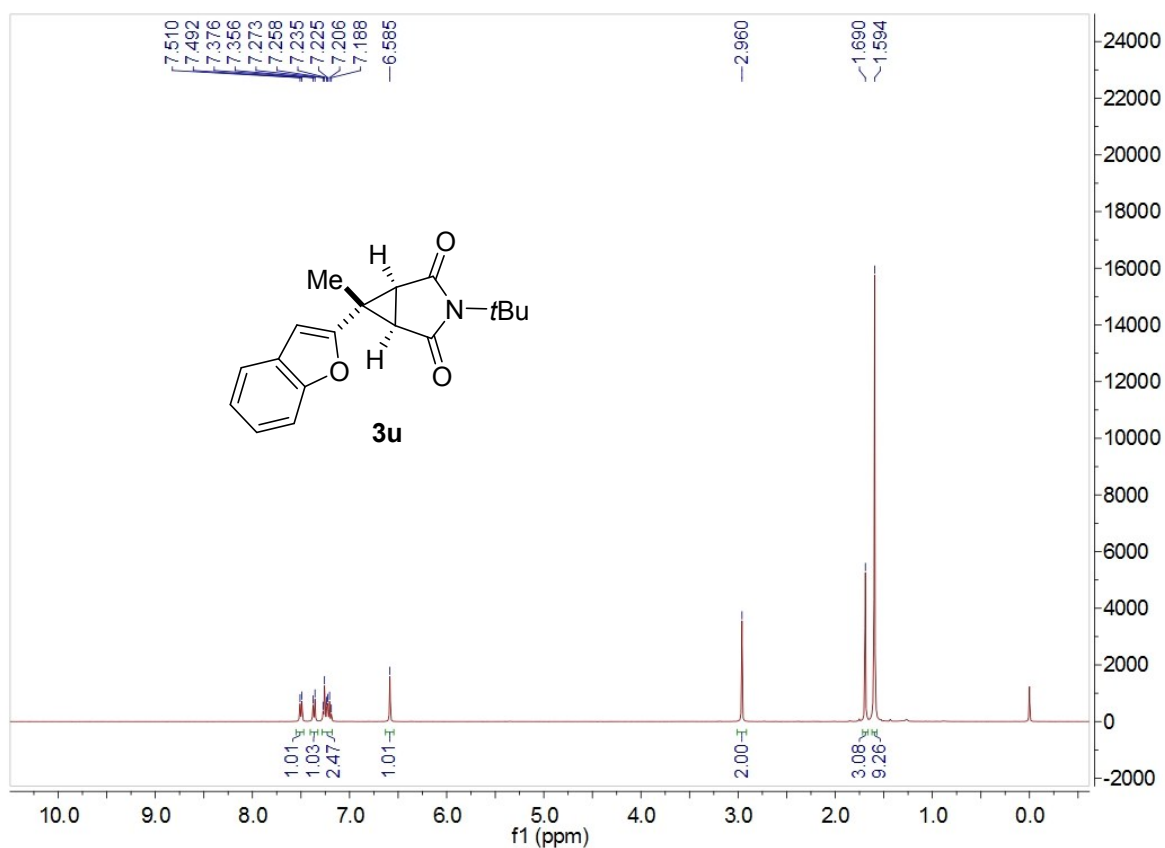

**<sup>13</sup>C NMR (100 MHz, CDCl<sub>3</sub>) spectrum for 3u**

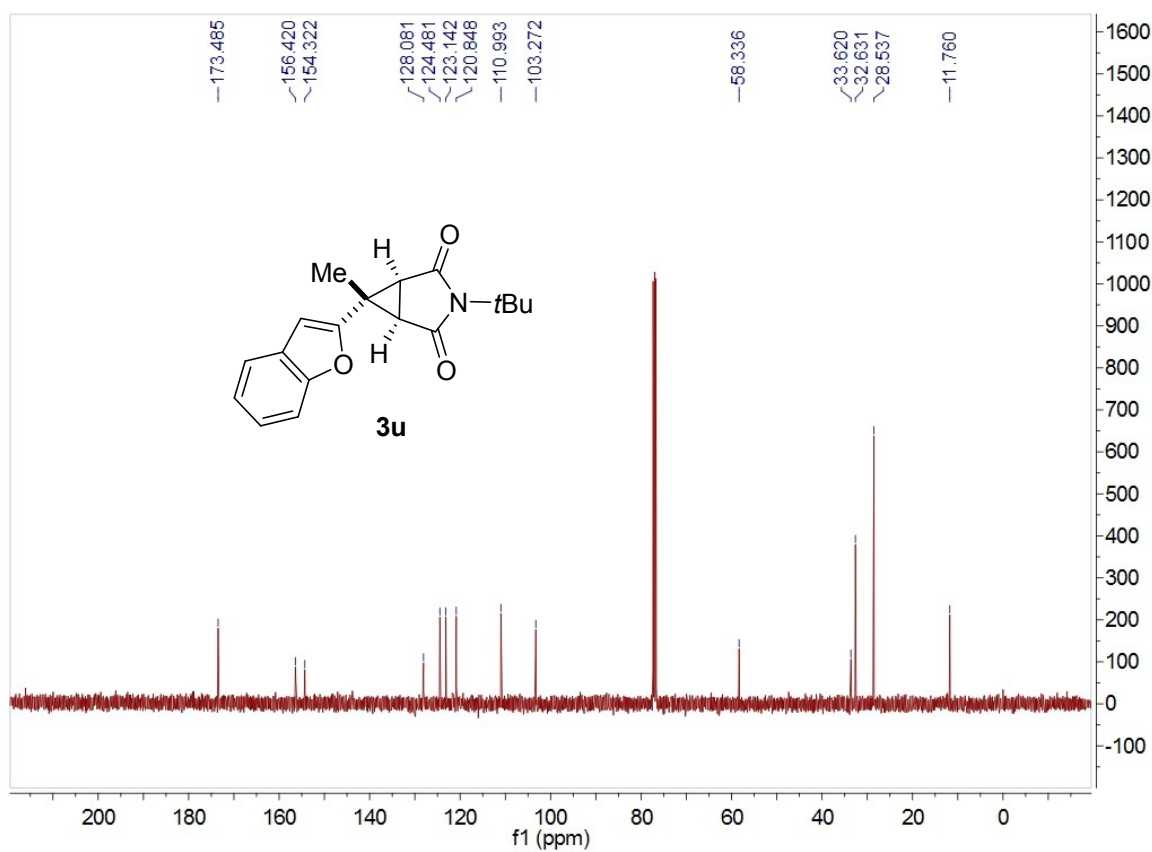

**<sup>1</sup>H NMR (400 MHz, CDCl<sub>3</sub>) spectrum for 3v**

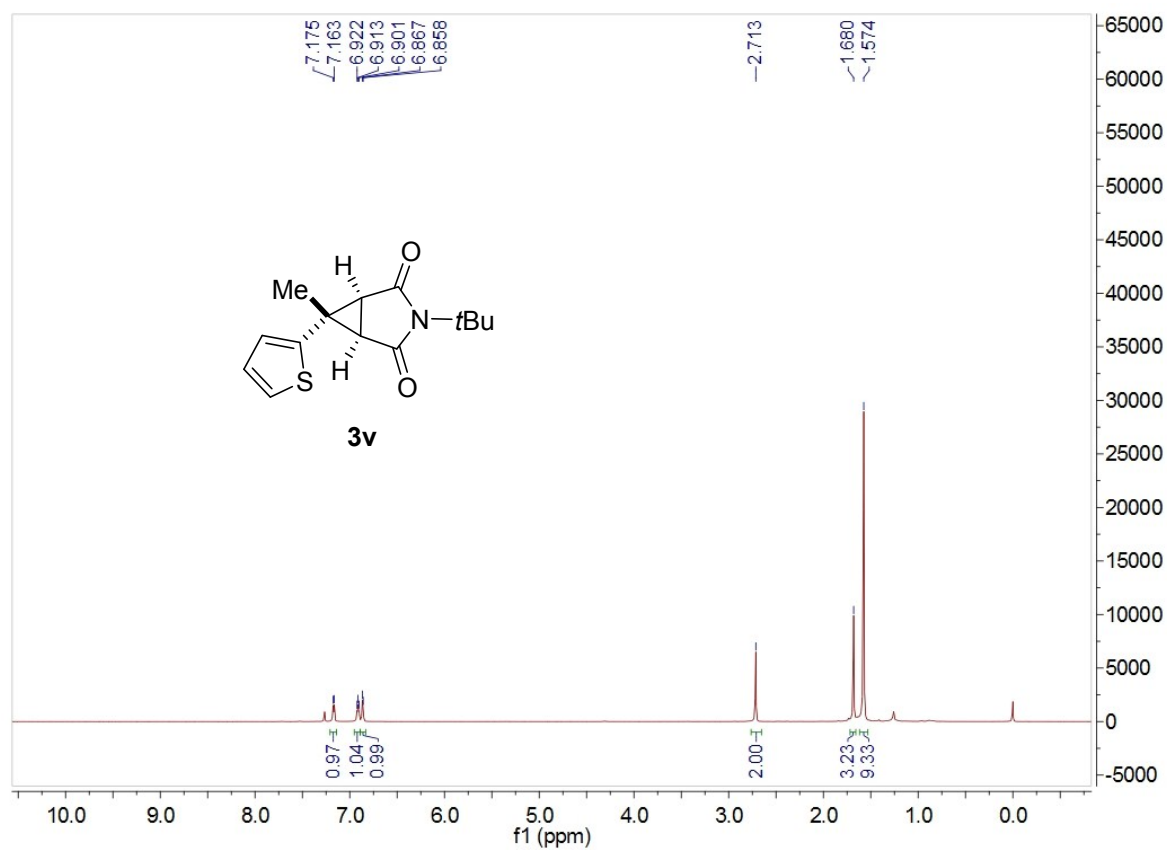

**<sup>13</sup>C NMR (100 MHz, CDCl<sub>3</sub>) spectrum for 3v**

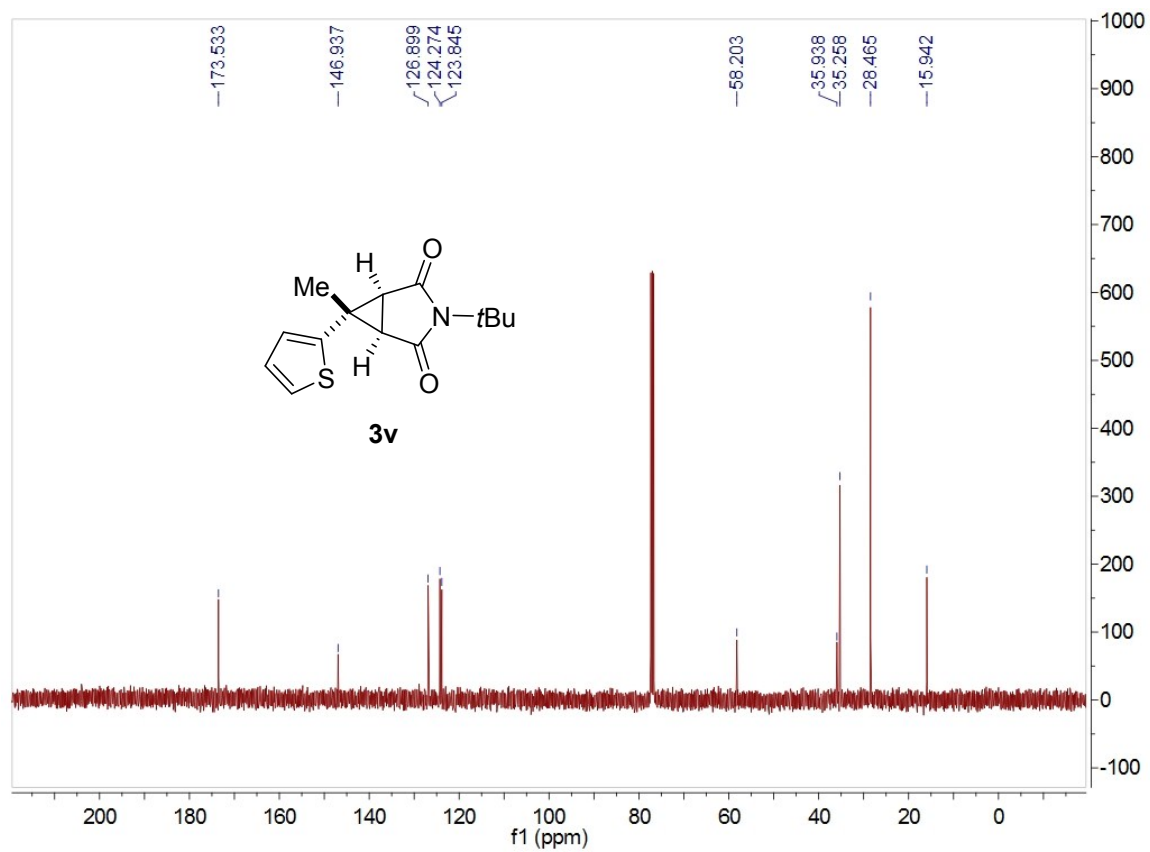

**<sup>1</sup>H NMR (400 MHz, CDCl<sub>3</sub>) spectrum for 3w**

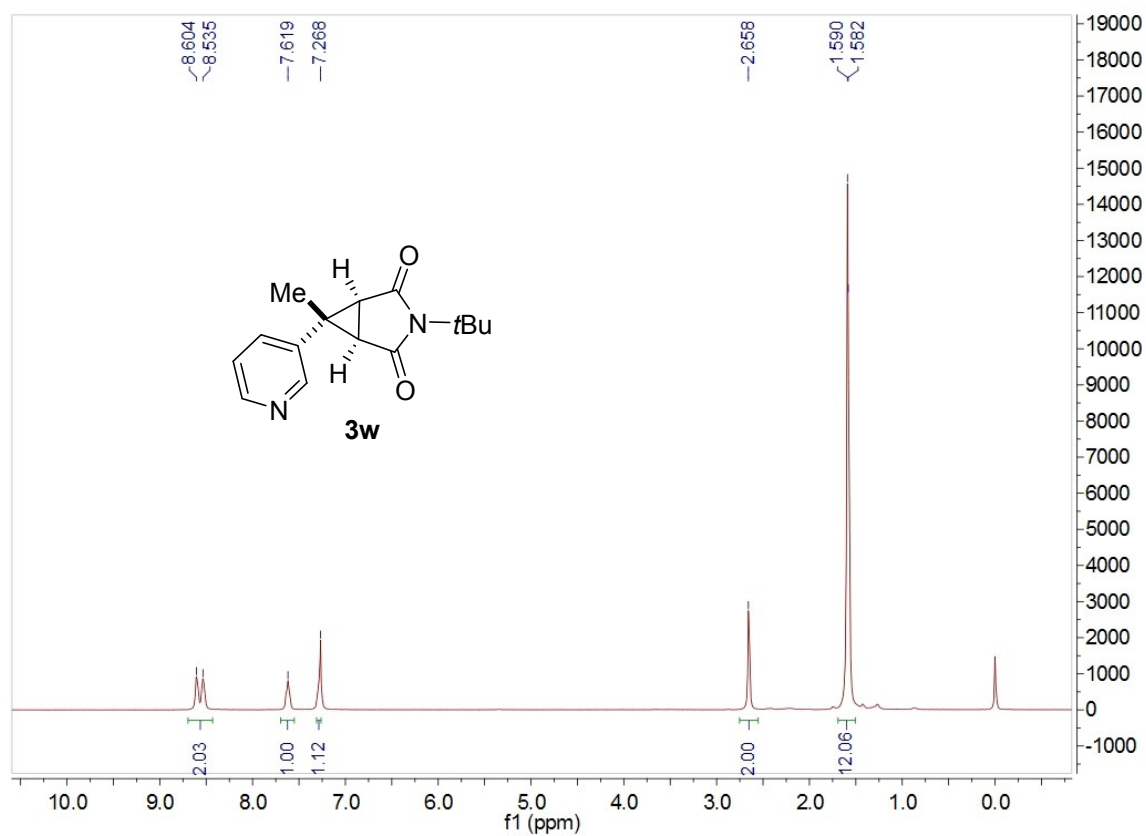

**<sup>13</sup>C NMR (100 MHz, CDCl<sub>3</sub>) spectrum for 3w**

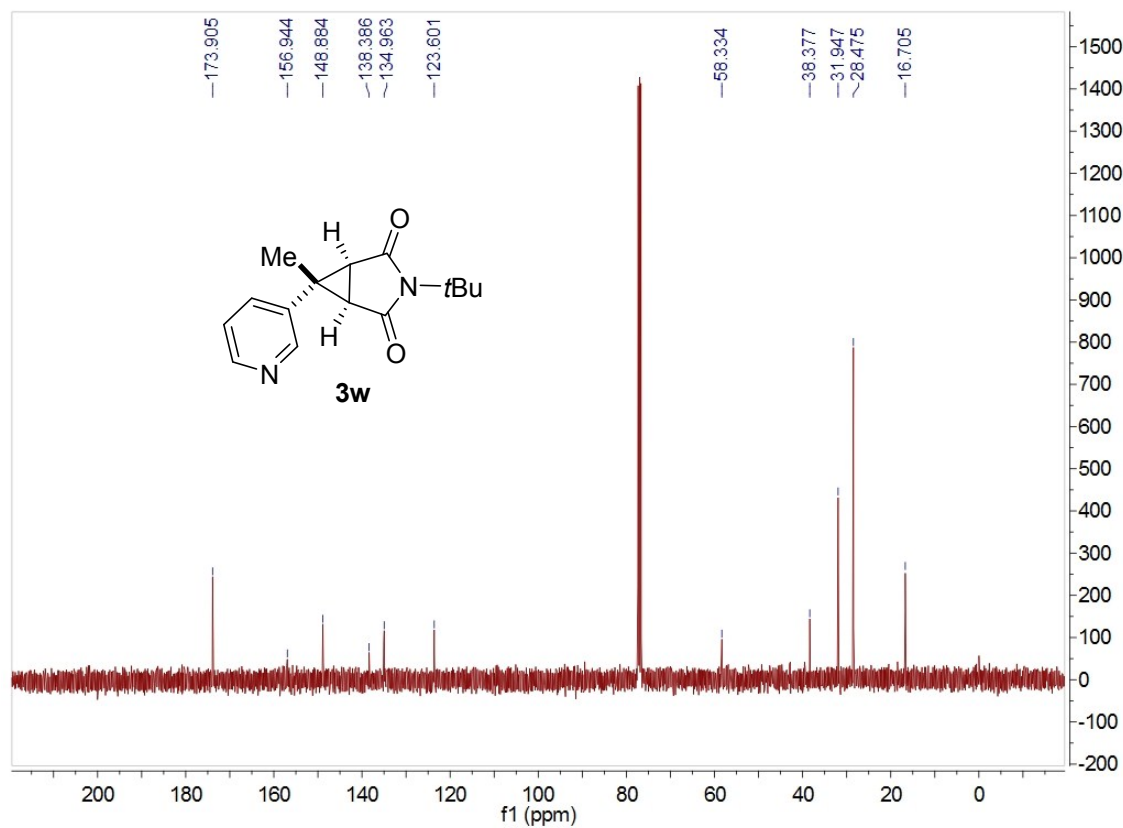

**<sup>1</sup>H NMR (400 MHz, CDCl<sub>3</sub>) spectrum for 3x**

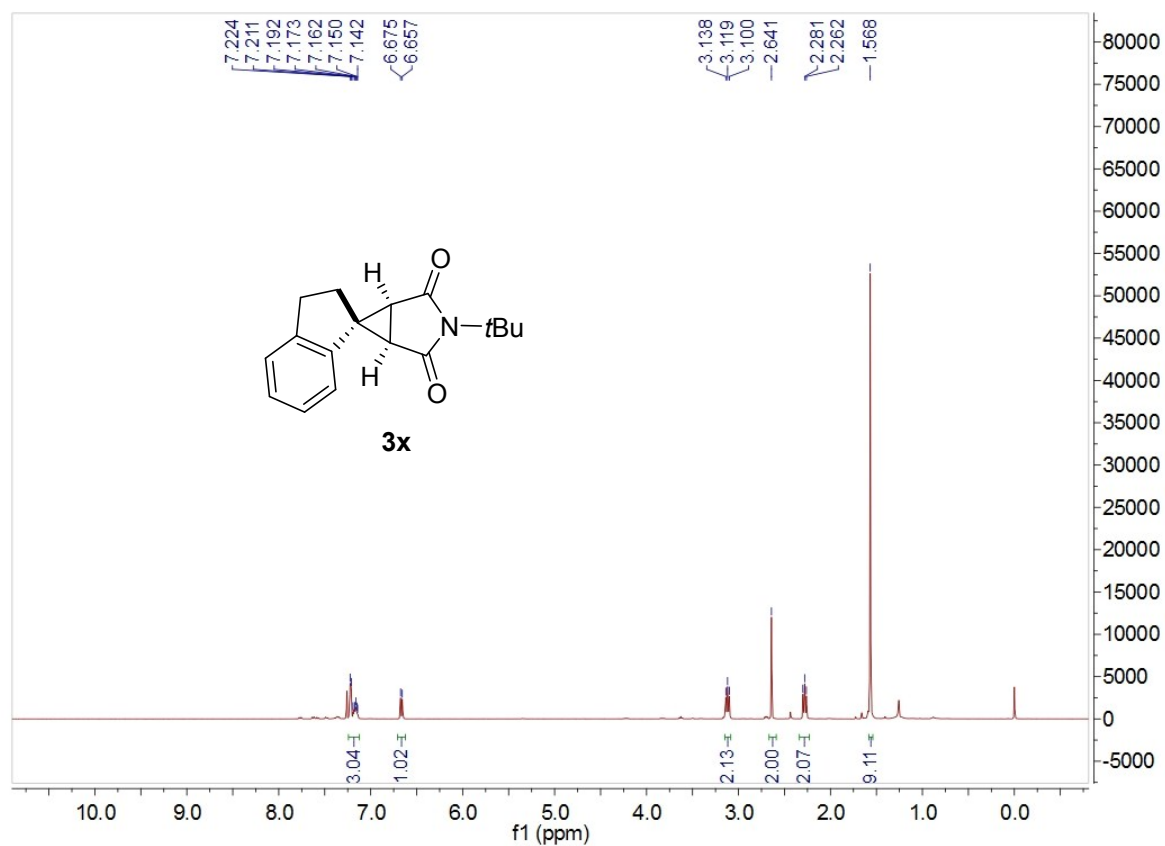

**<sup>13</sup>C NMR (100 MHz, CDCl<sub>3</sub>) spectrum for 3x**

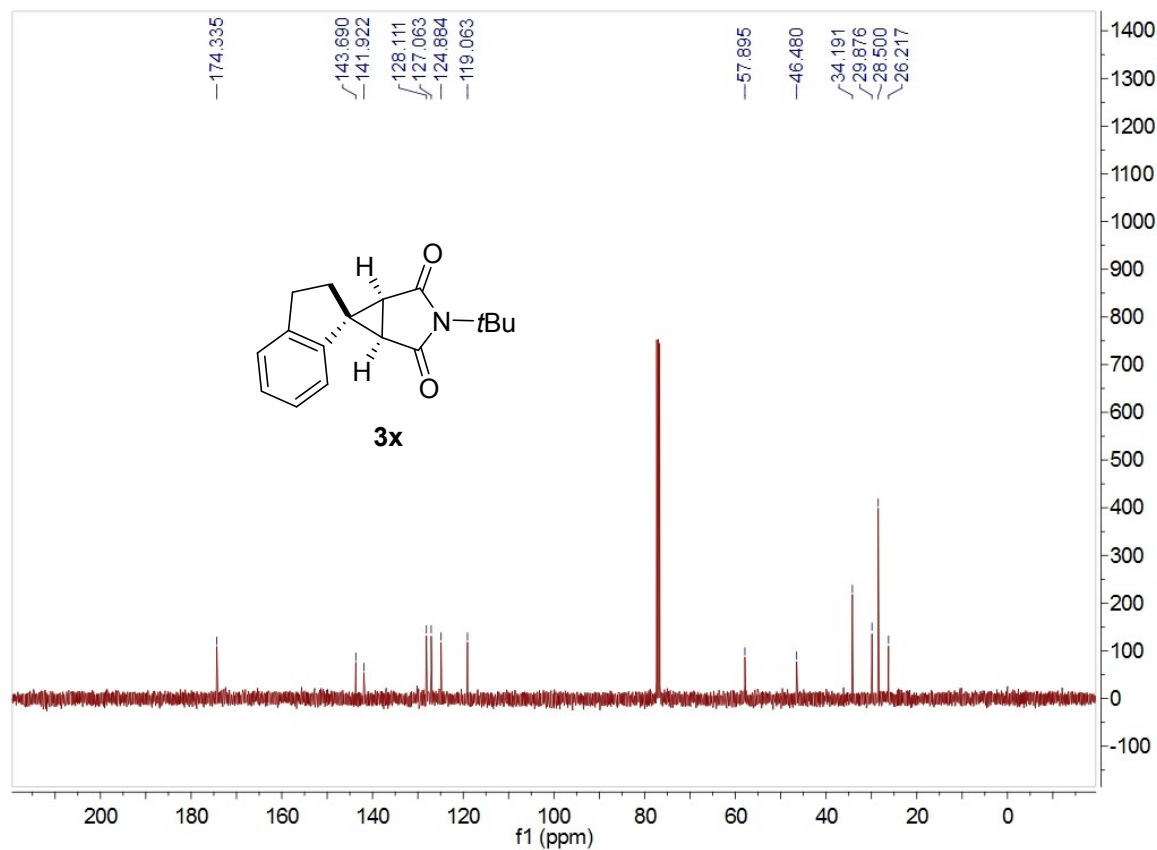

**<sup>1</sup>H NMR (400 MHz, CDCl<sub>3</sub>) spectrum for 3y**

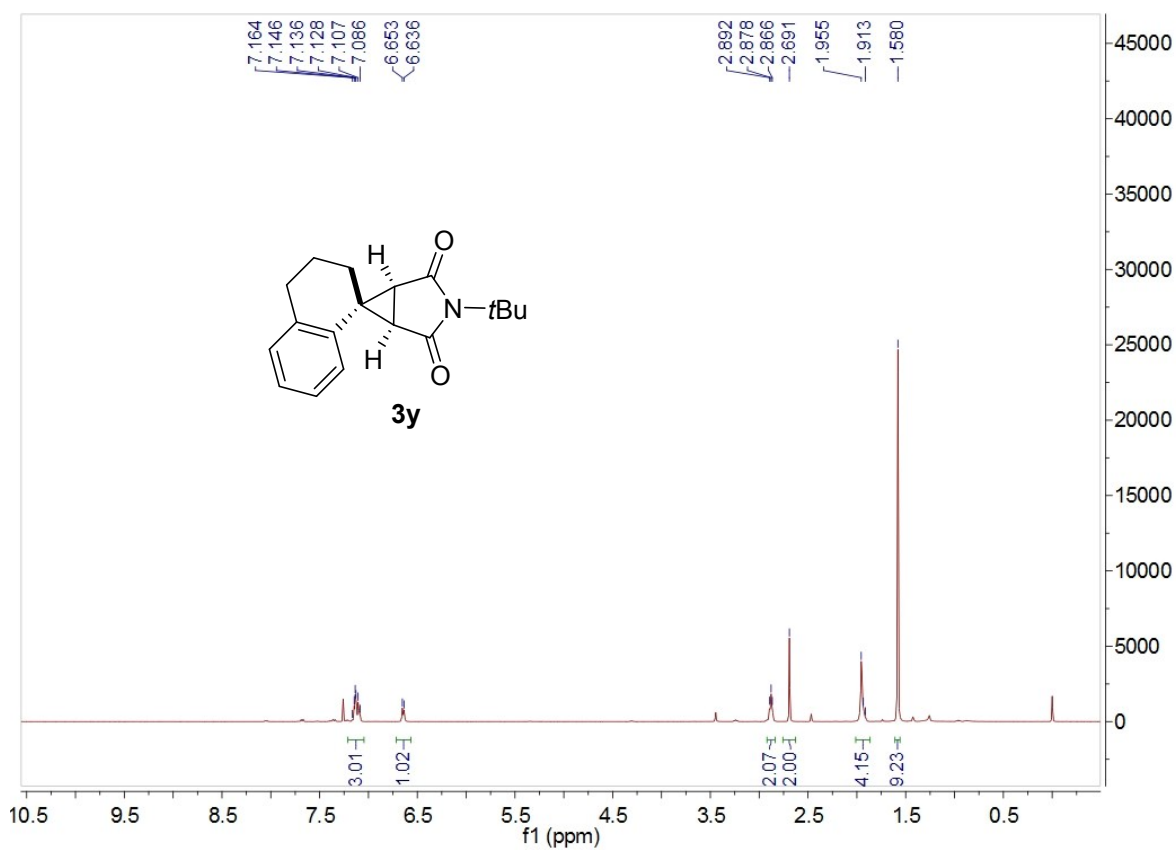

**<sup>13</sup>C NMR (100 MHz, CDCl<sub>3</sub>) spectrum for 3y**

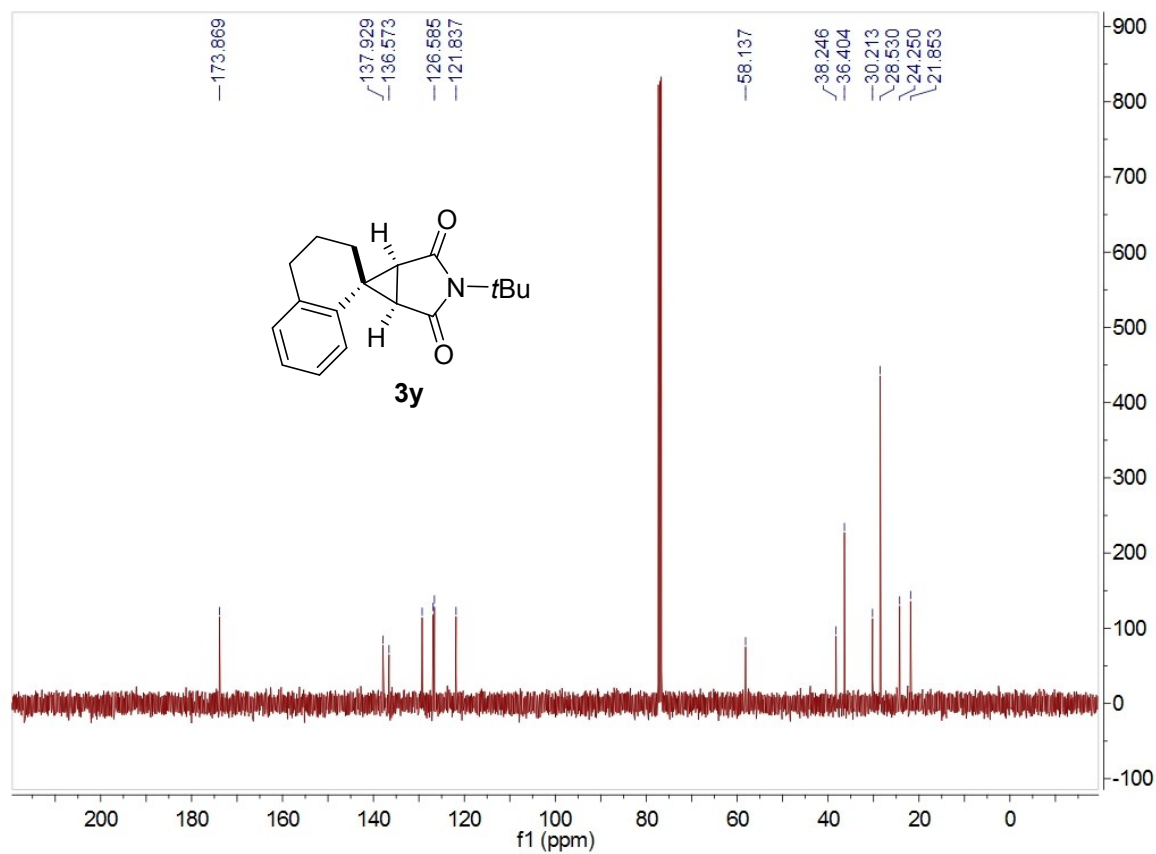

**<sup>1</sup>H NMR (400 MHz, CDCl<sub>3</sub>) spectrum for 3z**

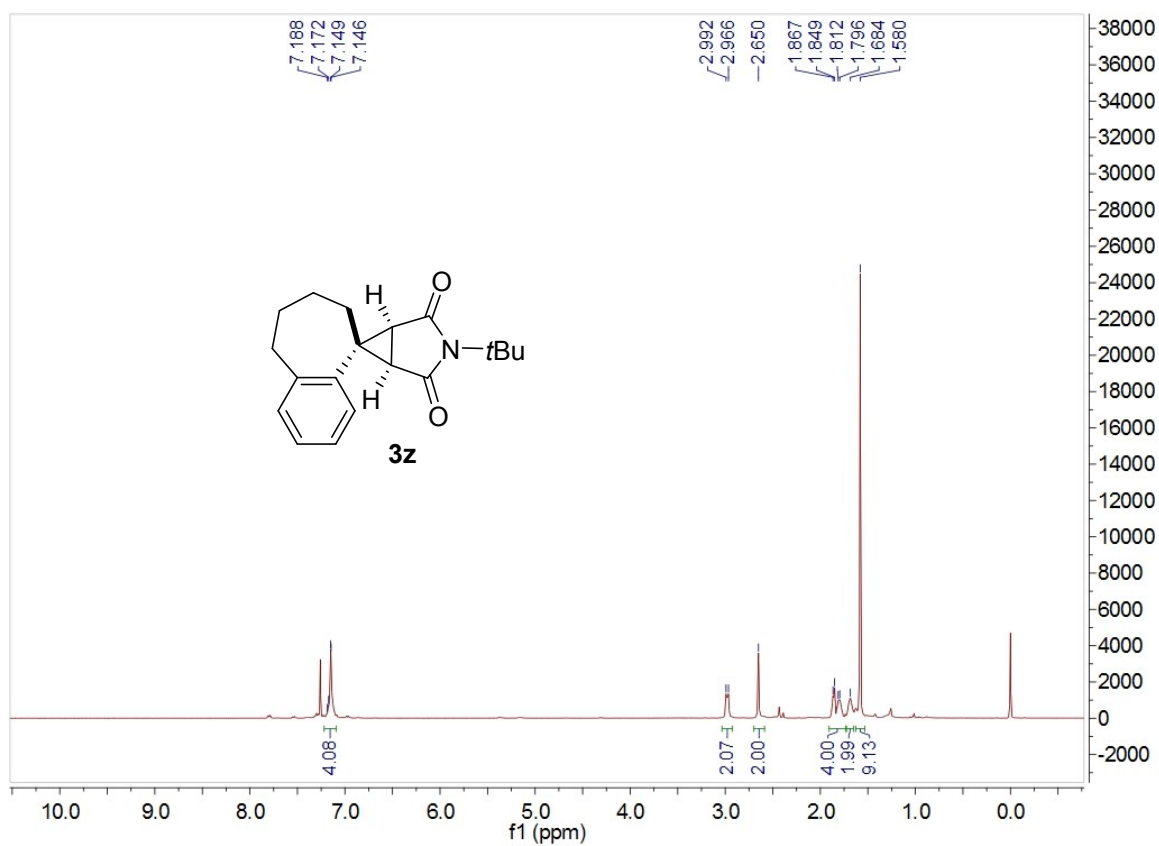

**<sup>13</sup>C NMR (100 MHz, CDCl<sub>3</sub>) spectrum for 3z**

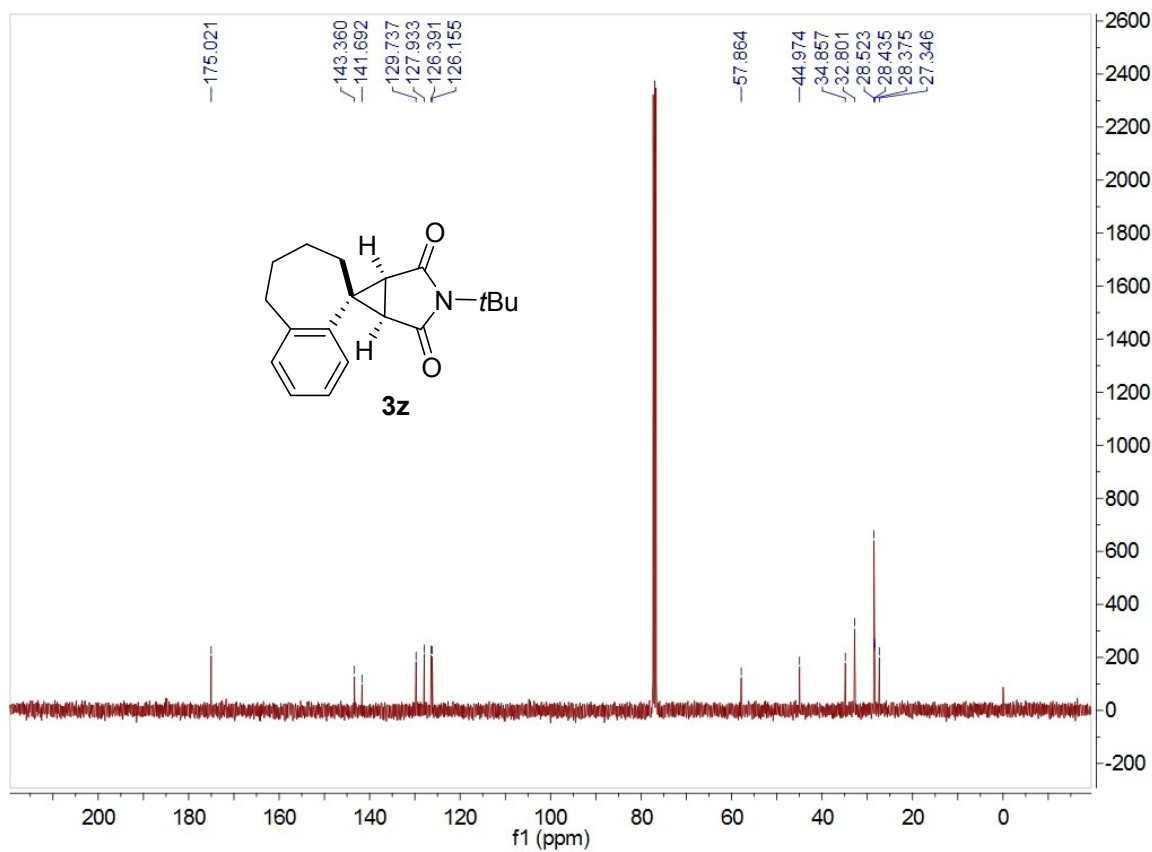

**<sup>1</sup>H NMR (400 MHz, CDCl<sub>3</sub>) spectrum for 3aa**

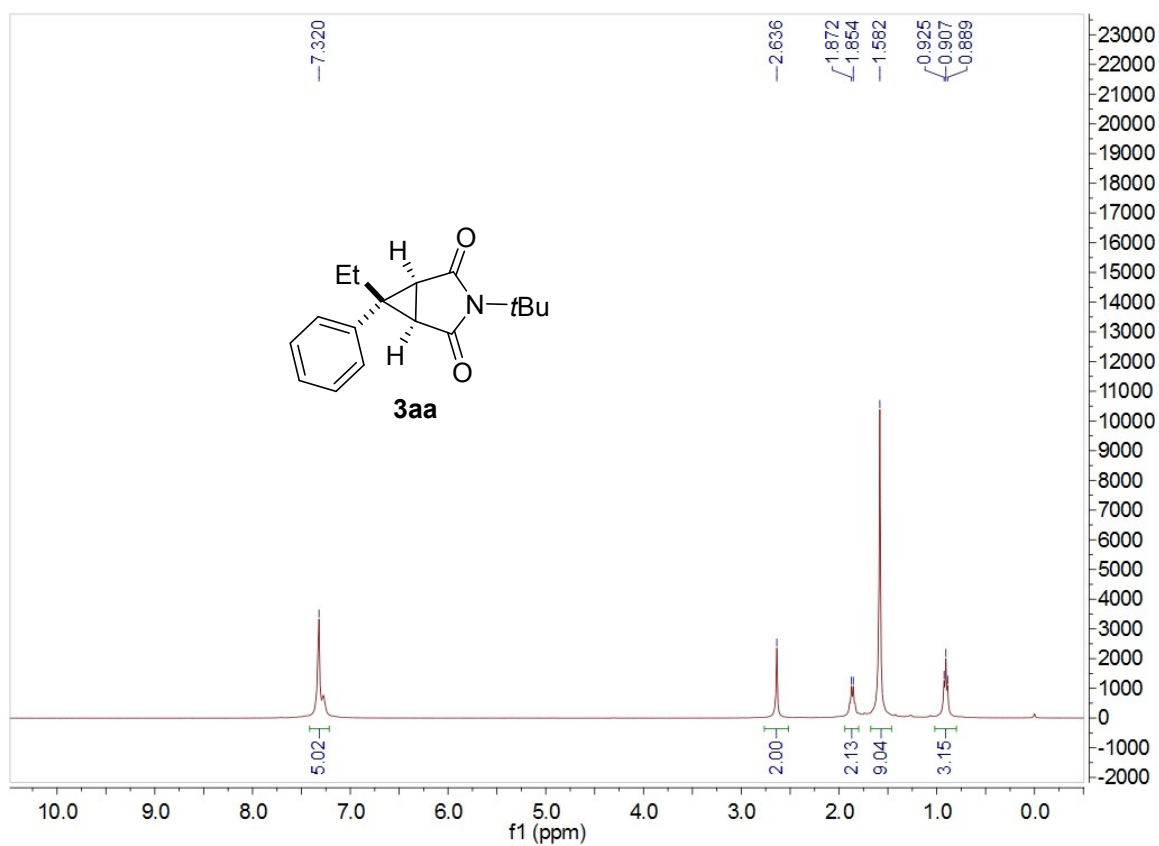

**<sup>13</sup>C NMR (100 MHz, CDCl<sub>3</sub>) spectrum for 3aa**

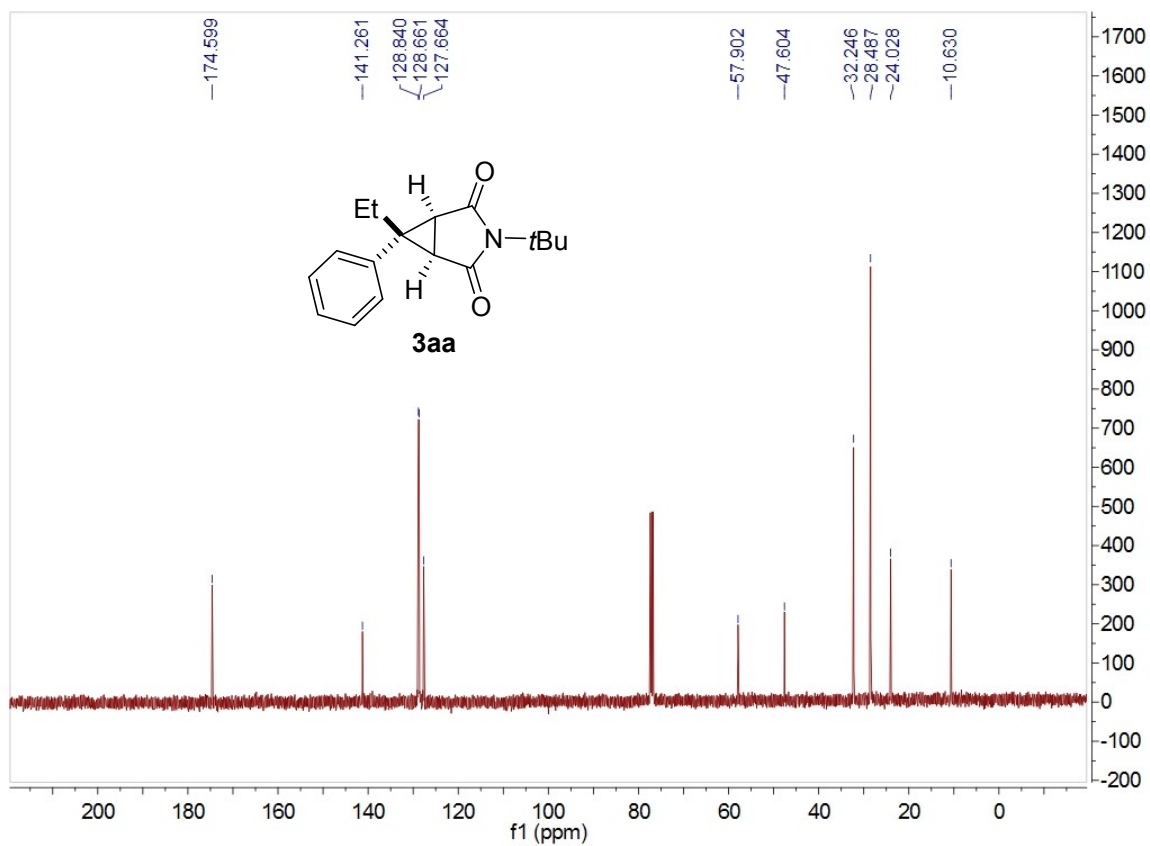



**<sup>1</sup>H NMR (400 MHz, CDCl<sub>3</sub>) spectrum for 3ab**

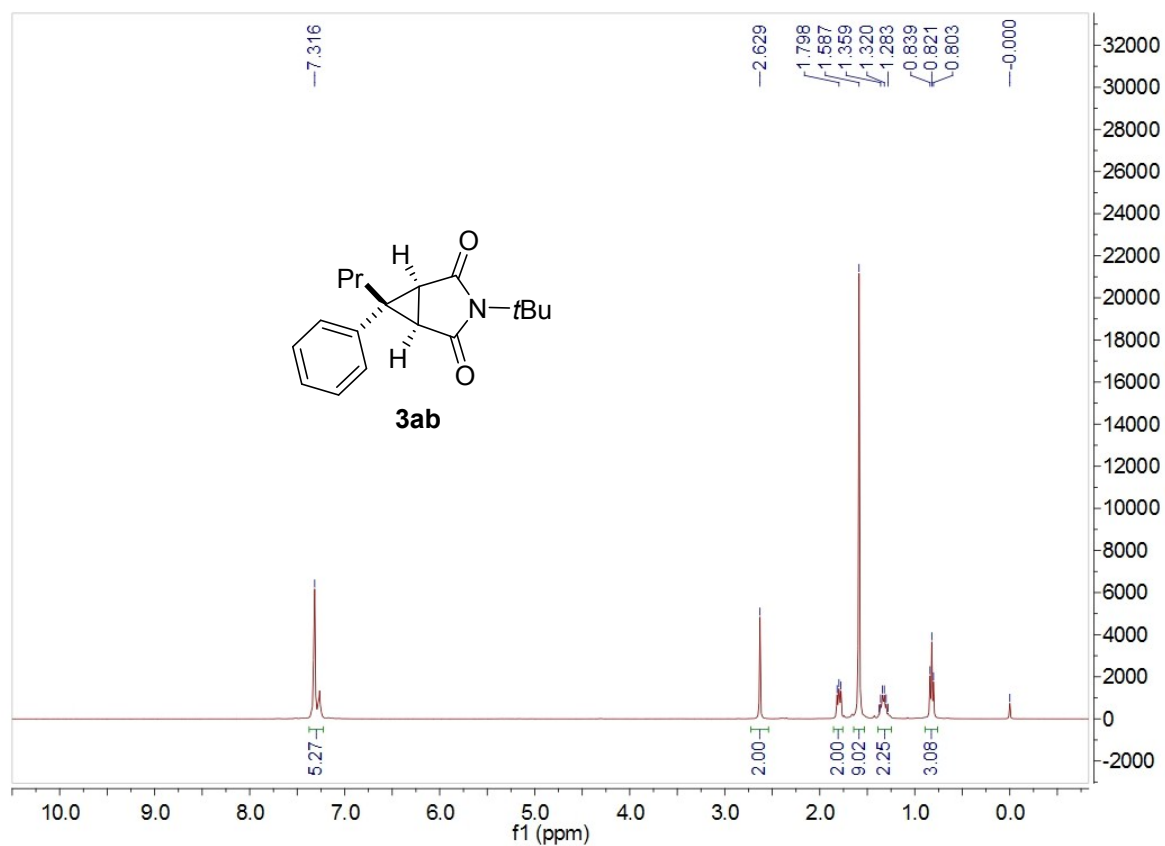

**<sup>13</sup>C NMR (100 MHz, CDCl<sub>3</sub>) spectrum for 3ab**

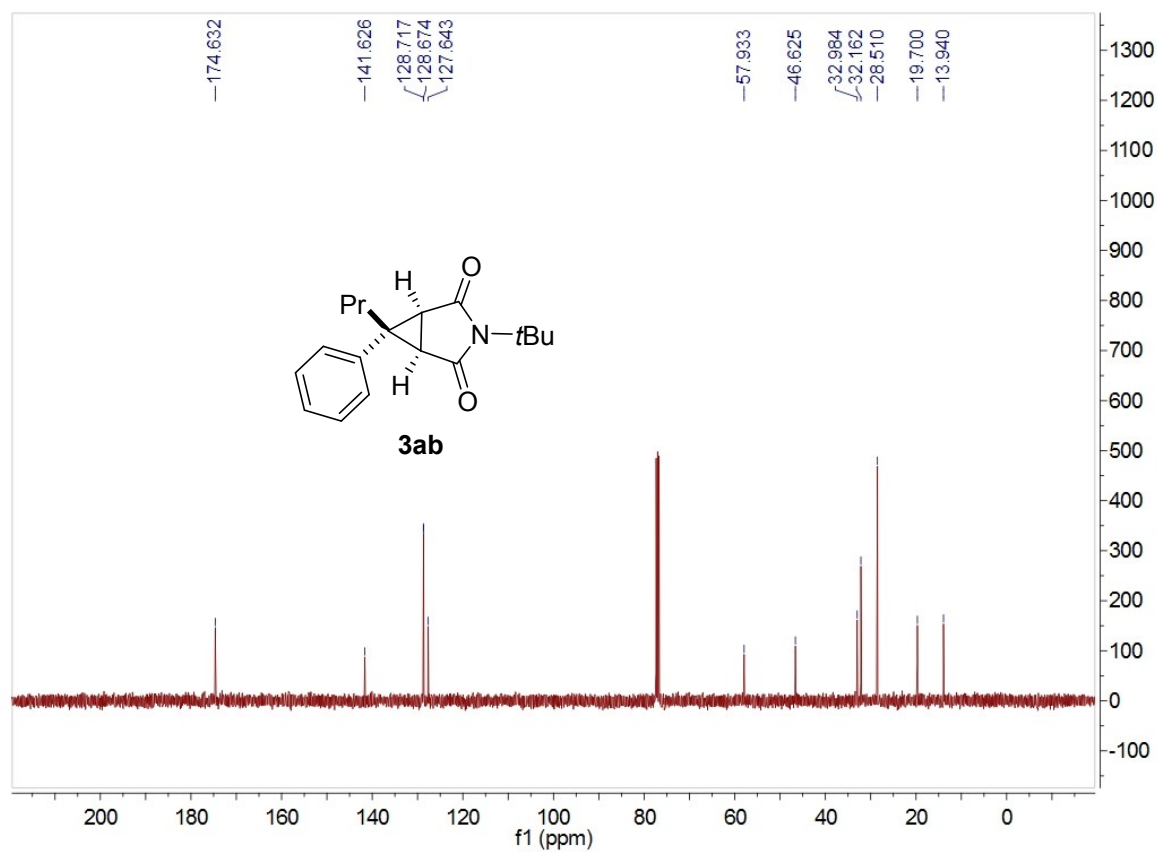

**<sup>1</sup>H NMR (400 MHz, CDCl<sub>3</sub>) spectrum for 3ac**

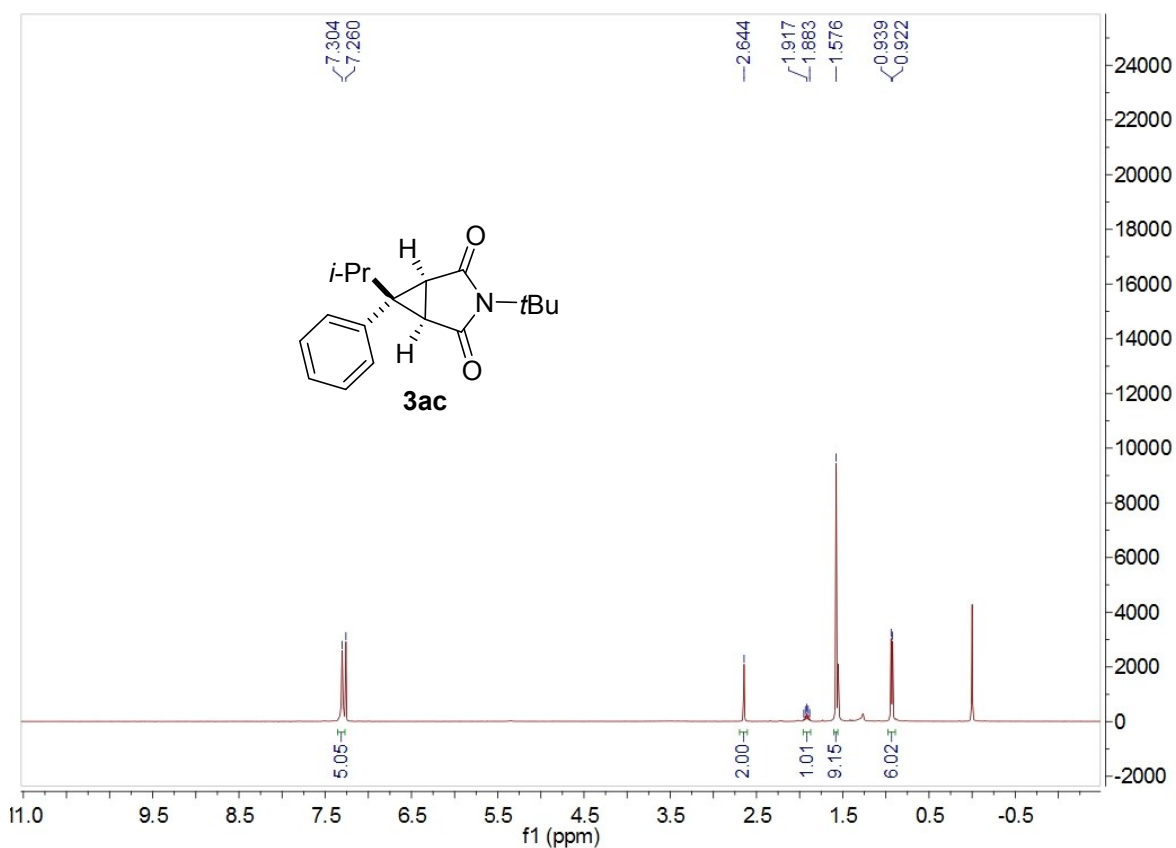

**<sup>13</sup>C NMR (100 MHz, CDCl<sub>3</sub>) spectrum for 3ac**

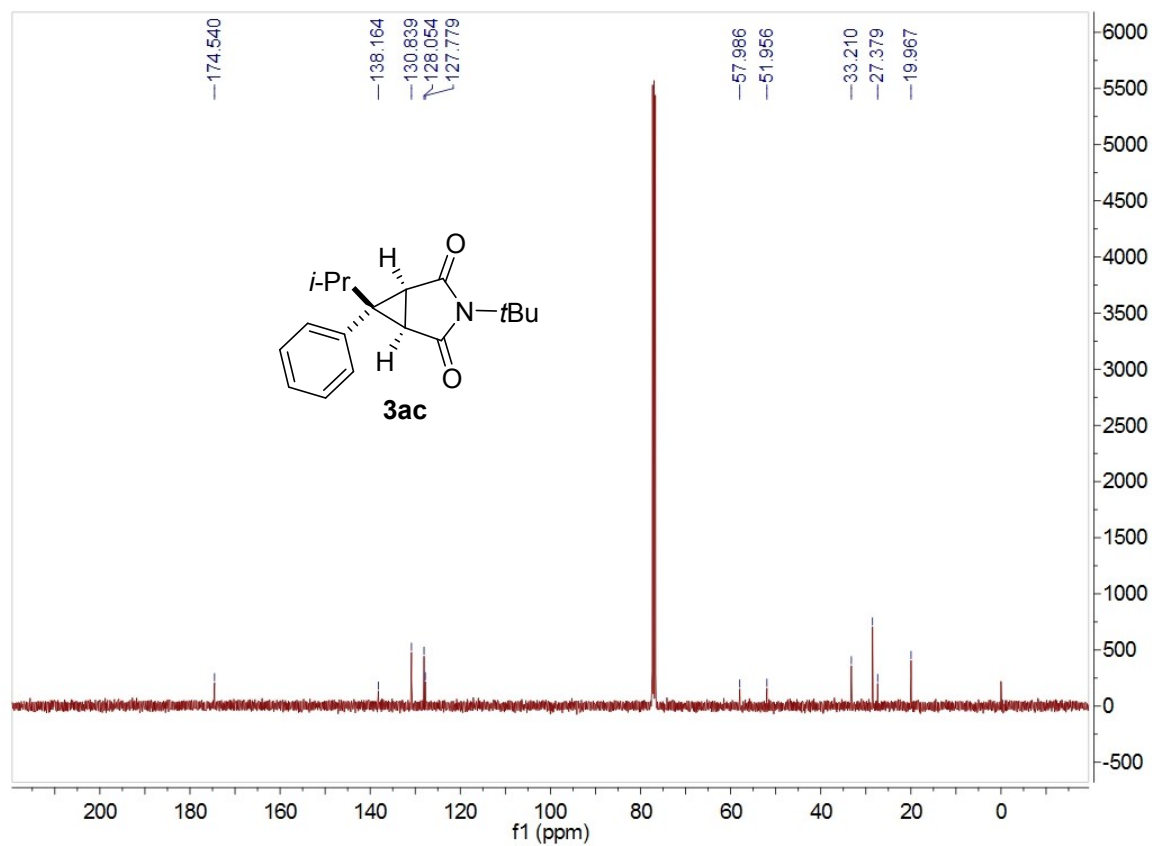

**<sup>1</sup>H NMR (400 MHz, CDCl<sub>3</sub>) spectrum for 3ad**

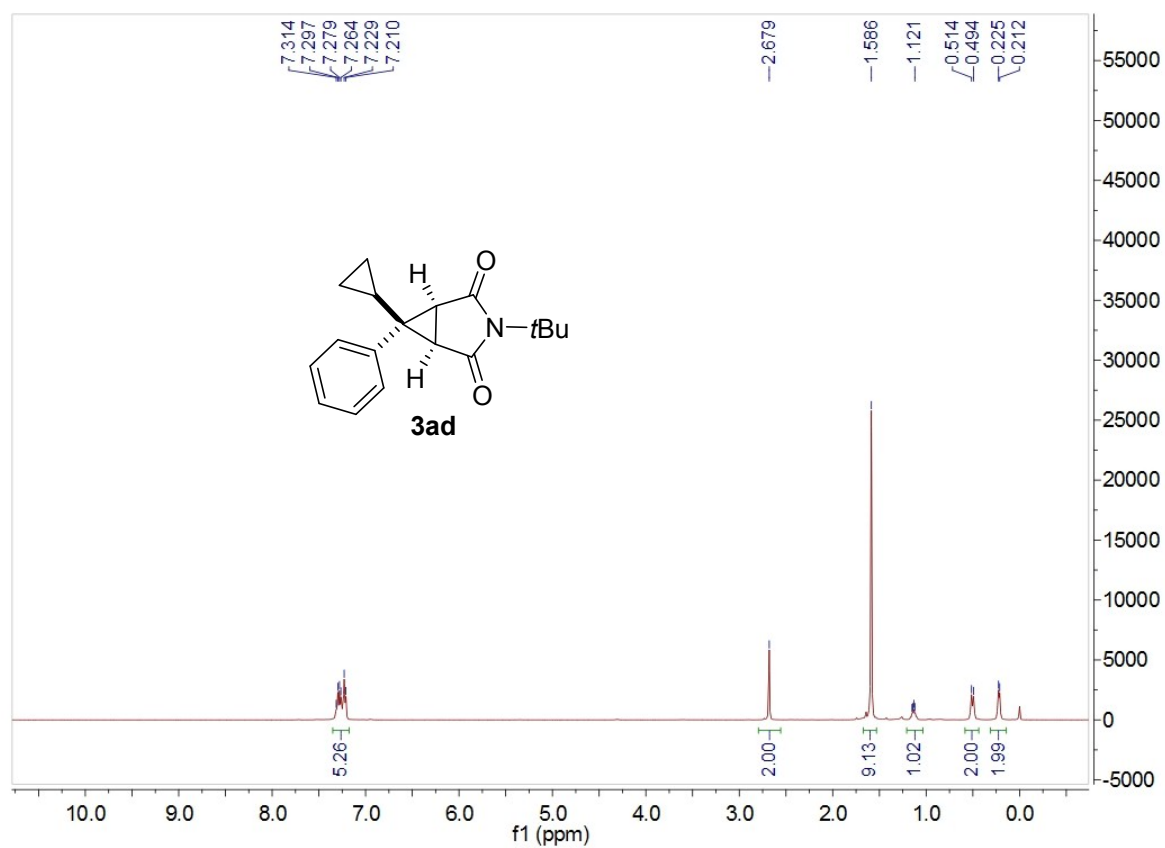

**<sup>13</sup>C NMR (100 MHz, CDCl<sub>3</sub>) spectrum for 3ad**

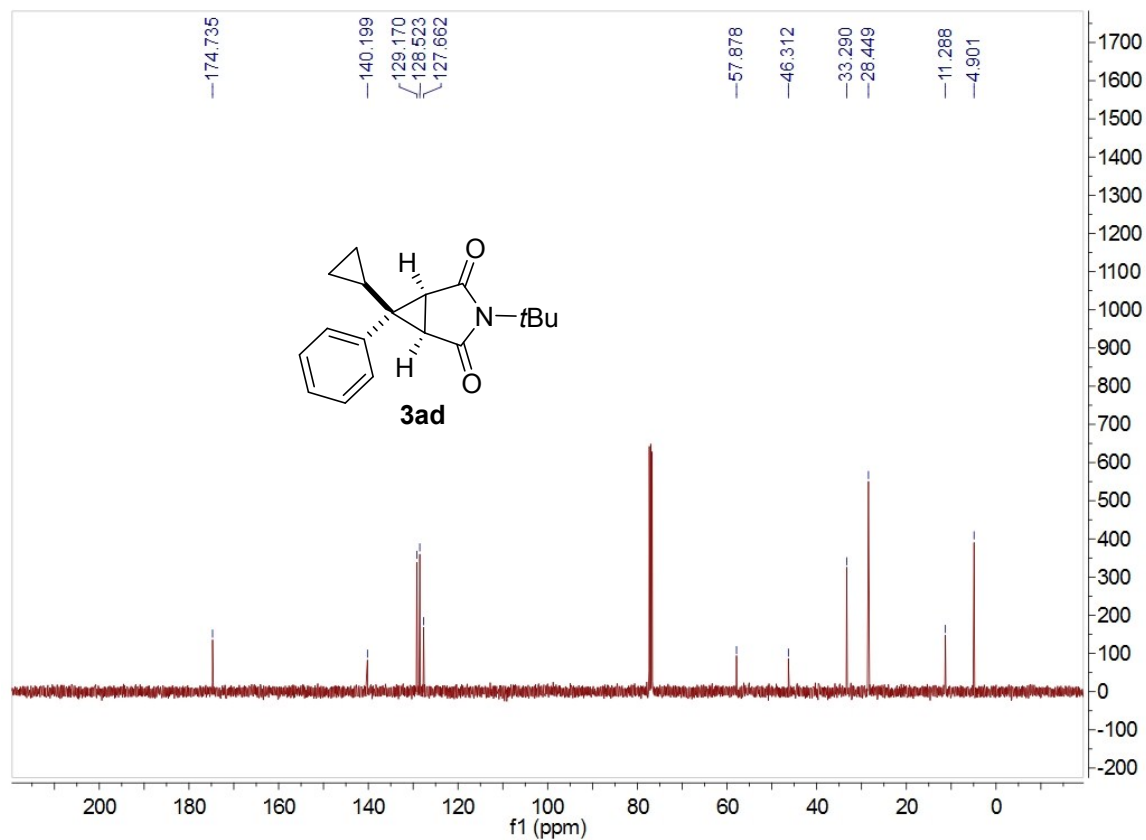

**<sup>1</sup>H NMR (400 MHz, CDCl<sub>3</sub>) spectrum for 3ae**

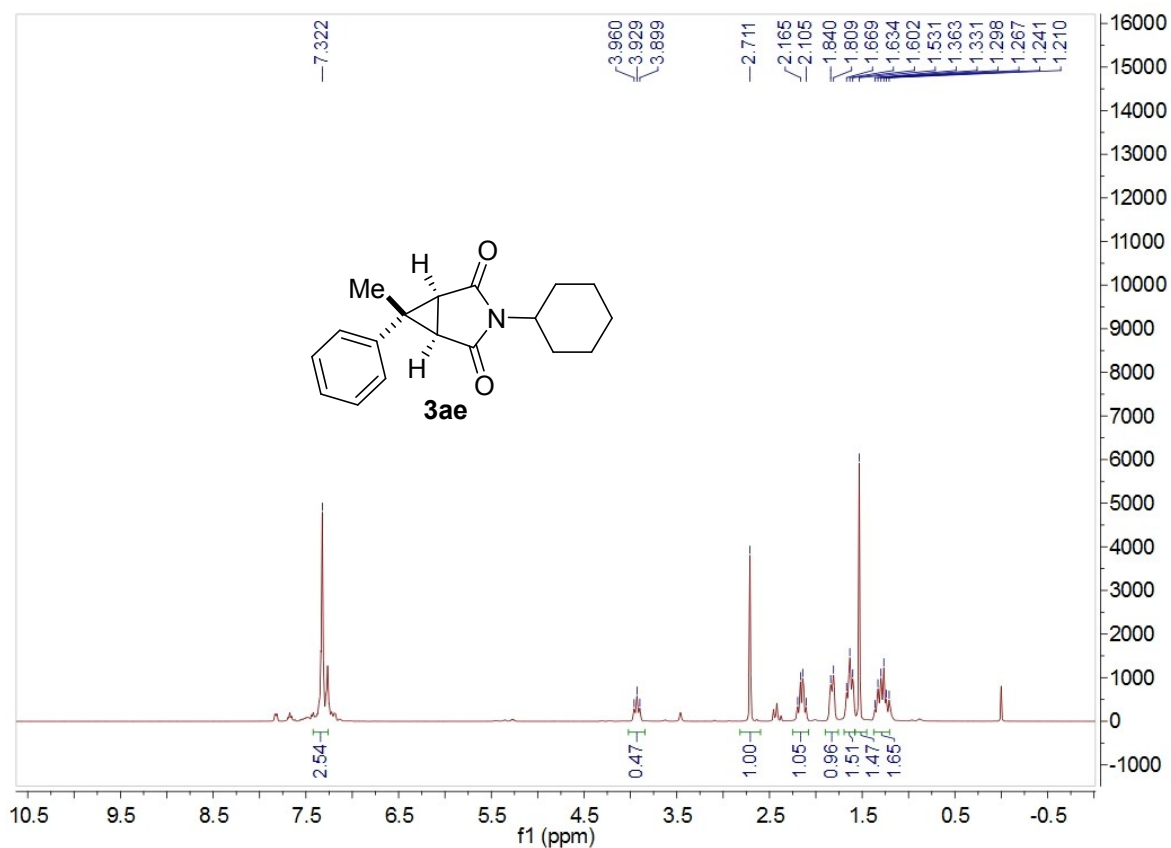

**<sup>13</sup>C NMR (100 MHz, CDCl<sub>3</sub>) spectrum for 3ae**

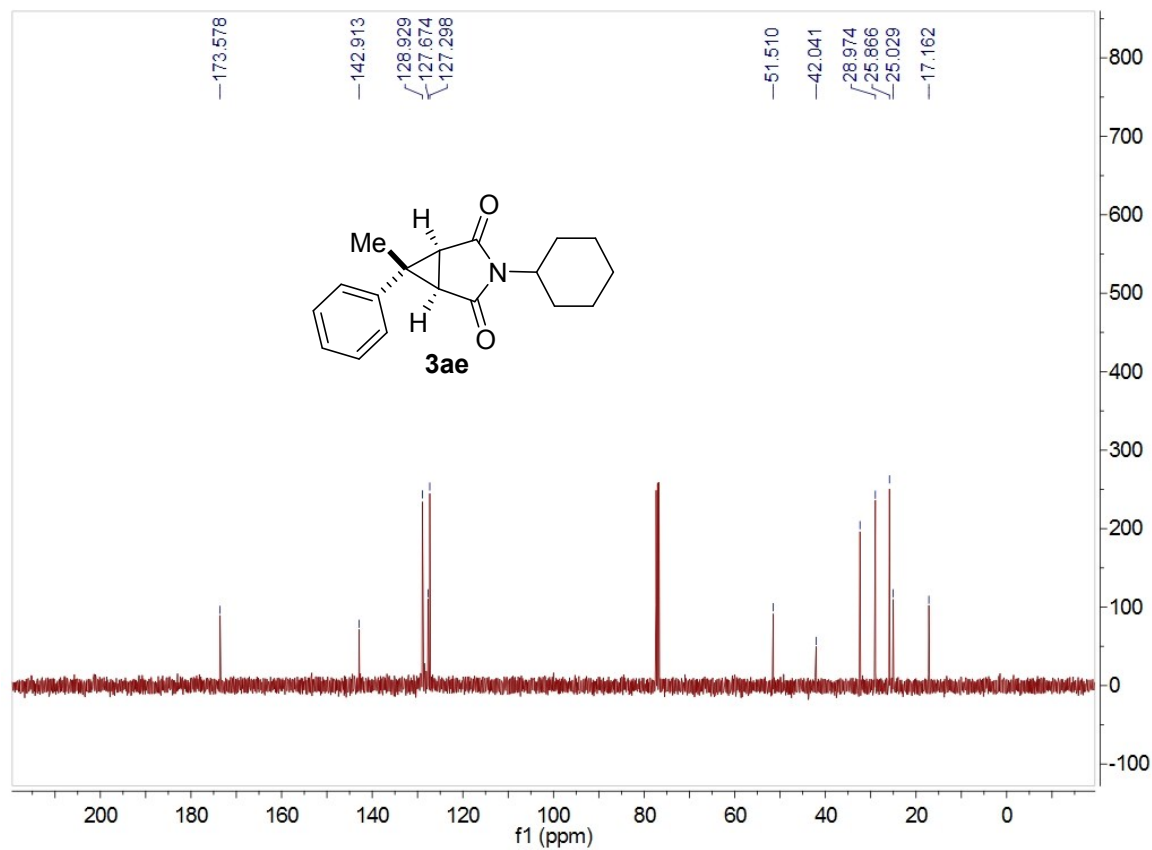

**<sup>1</sup>H NMR (400 MHz, CDCl<sub>3</sub>) spectrum for 3af**

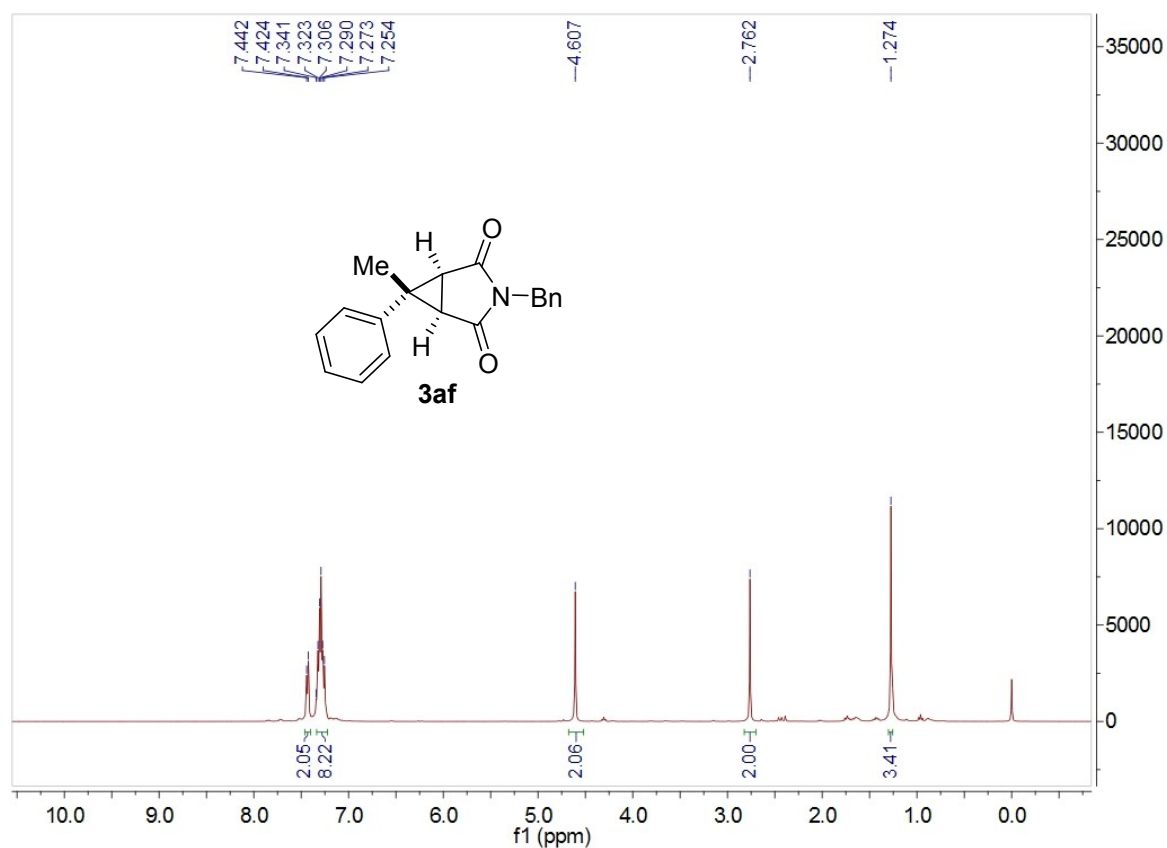

**<sup>13</sup>C NMR (100 MHz, CDCl<sub>3</sub>) spectrum for 3af**

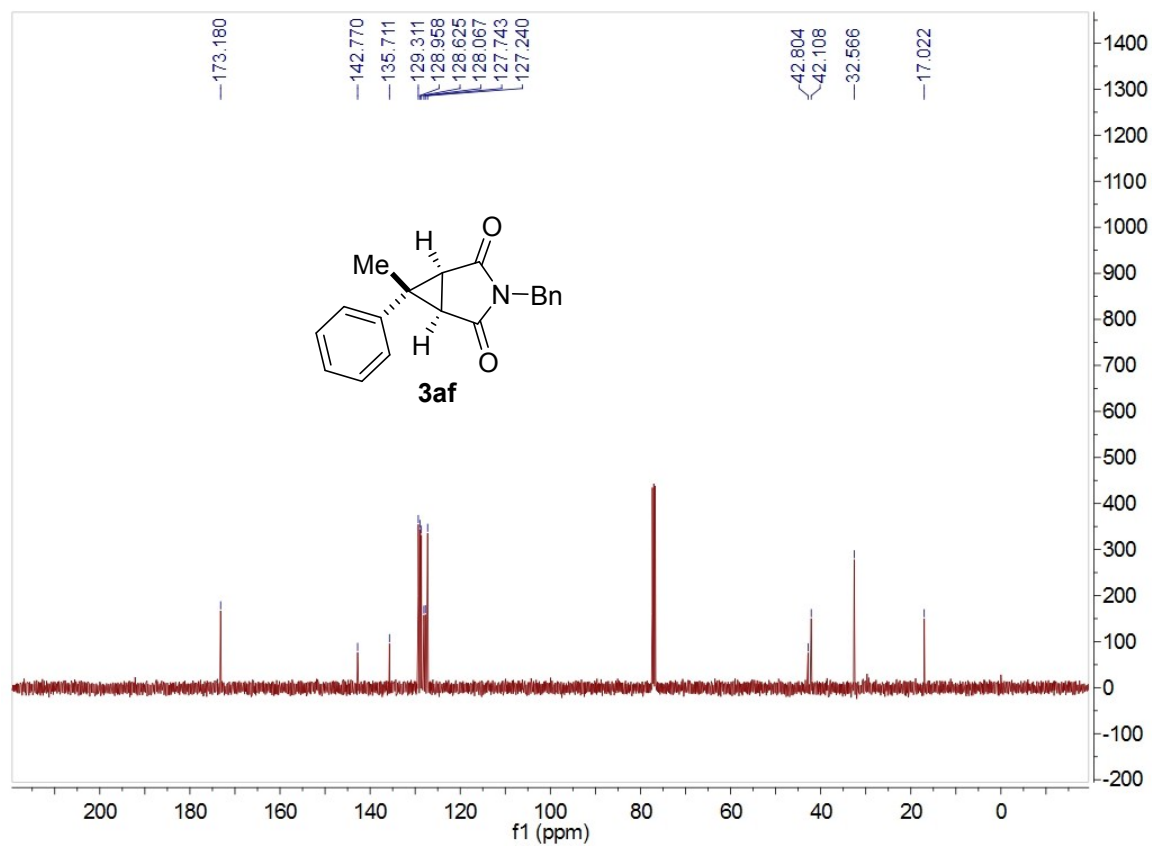

<sup>1</sup>H NMR (400 MHz, CDCl<sub>3</sub>) spectrum for **3ag**

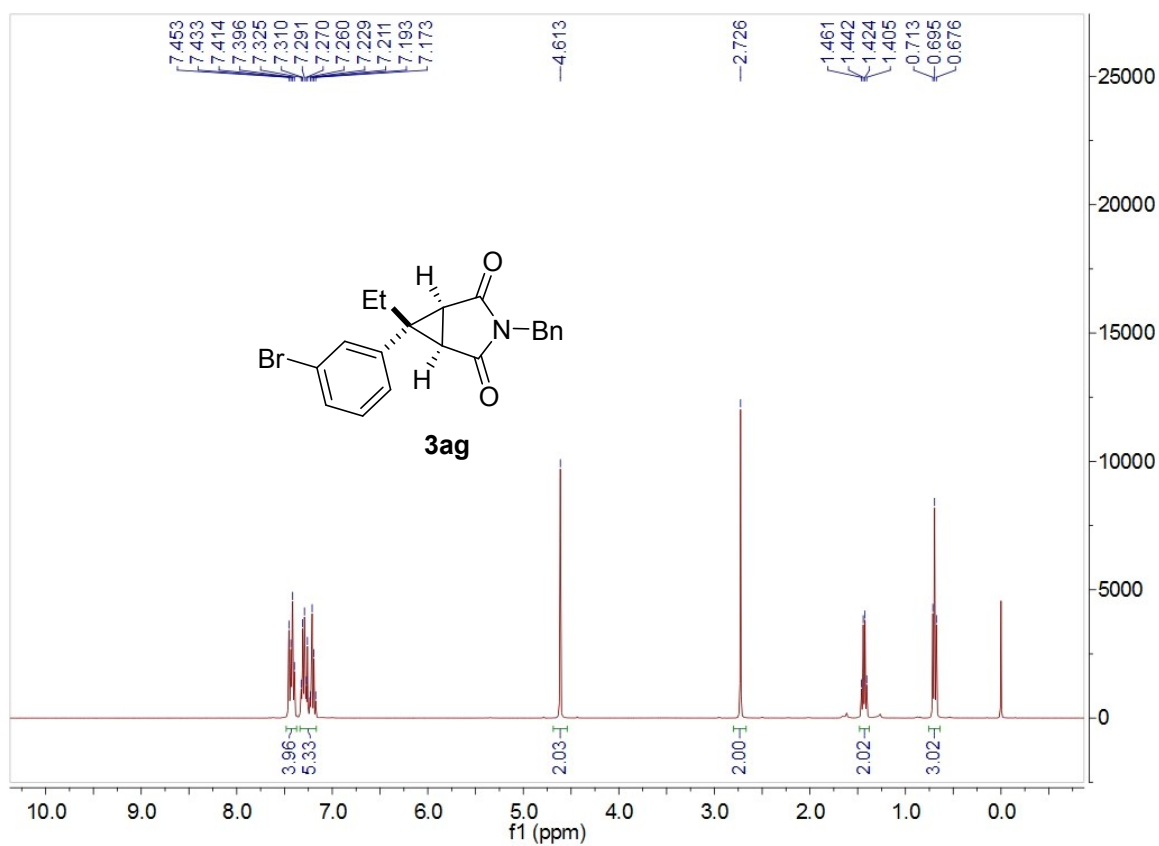

<sup>13</sup>C NMR (100 MHz, CDCl<sub>3</sub>) spectrum for **3ag**

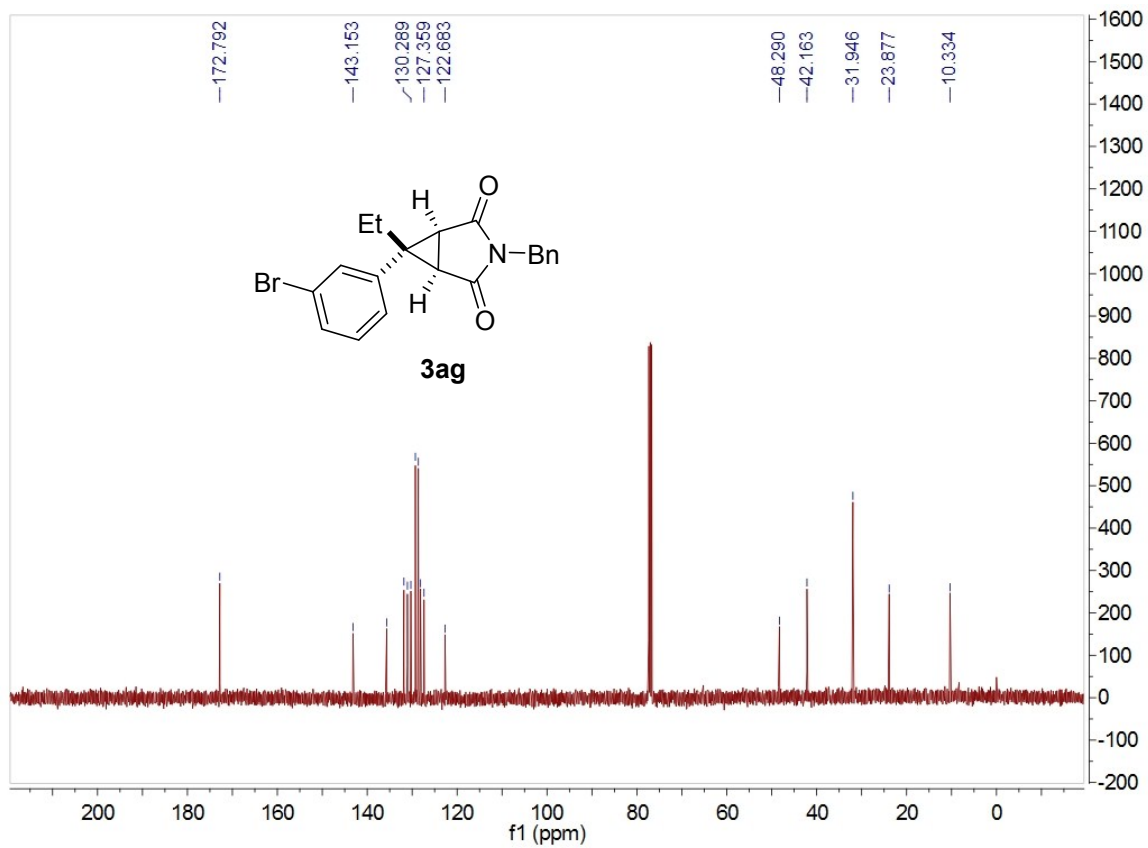

**<sup>1</sup>H NMR (400 MHz, CDCl<sub>3</sub>) spectrum for 4a**

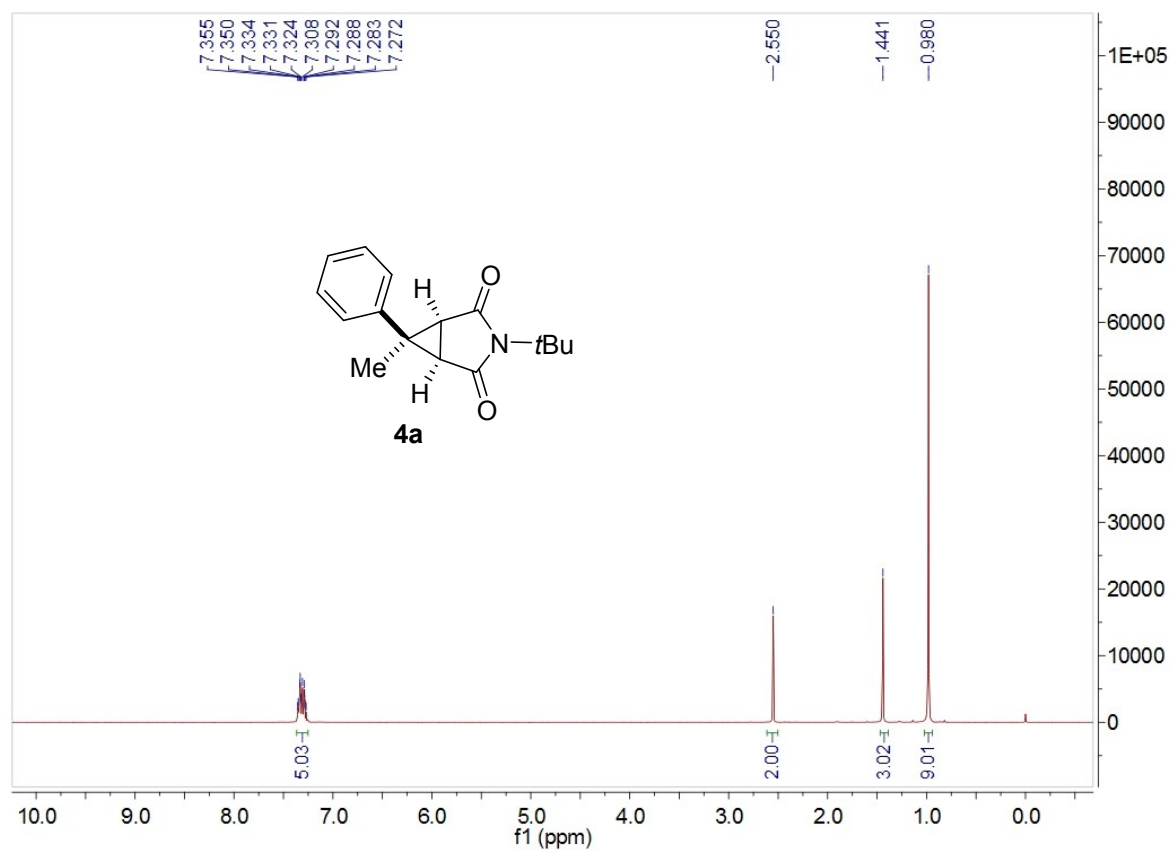

**<sup>13</sup>C NMR (100 MHz, CDCl<sub>3</sub>) spectrum for 4a**

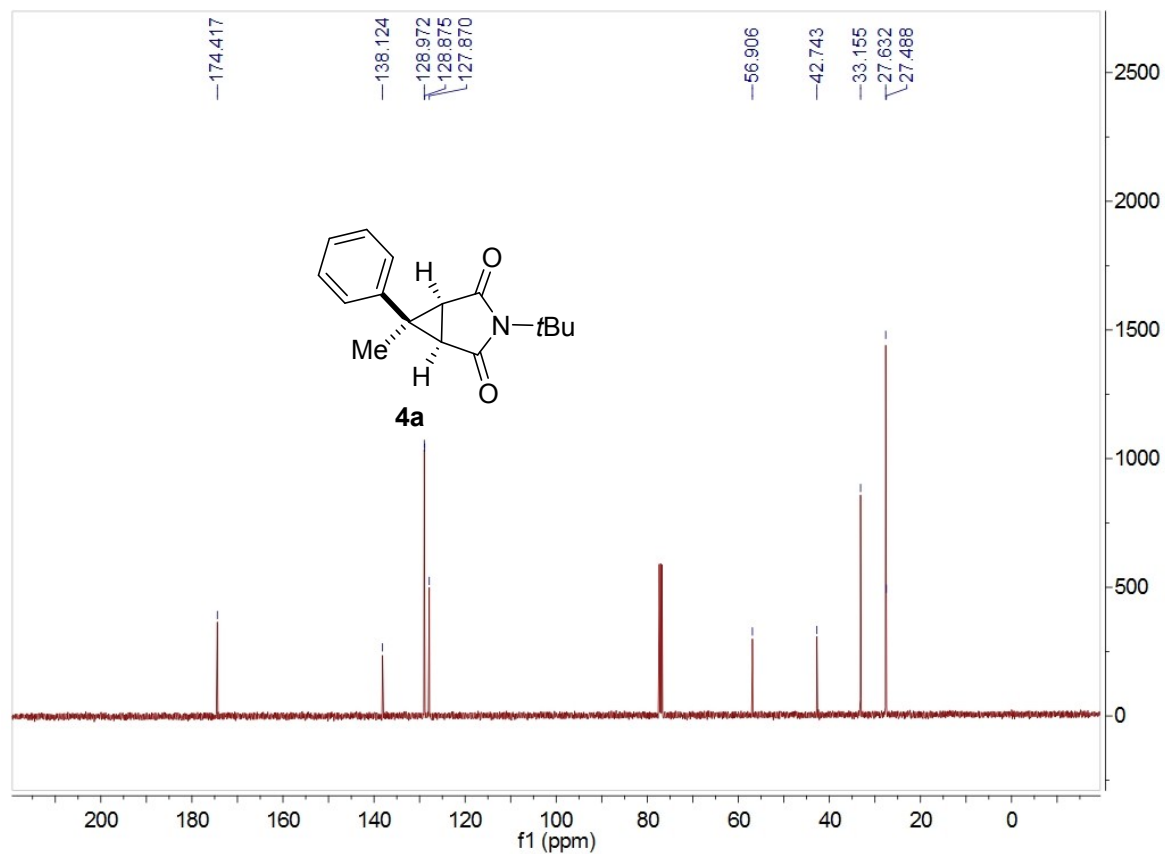

Supplement: c6ob02137a1.pdf [file c6ob02137a1.pdf]
